# Supplementary material for: Identification of immune and stromal cell infiltration-related gene signature for prognosis prediction in acute lymphoblastic leukemia
Source: Aging (Albany NY). 2022 Sep 19;14(18):7470–504. doi: 10.18632/aging.204292 (PMC9550239; doi:10.18632/aging.204292)
Supplement: Supplementary Table 1 [file aging-14-204292-s002.xlsx]

## Sheet: Training cohort 
Supplementary Table 1. Patients' ID and clinical characteristics.
ID	Days_to_last_follow_up	Vital_status	Immunophenotype	Age	Gender	Race	StromalScore	ImmuneScore	TumorPurity
TARGET-10-PATHGY-09A-01R	2125	Alive	T lymphoblastic leukemia/lymphoma	1319	male	white	-1660.77	2092.87	0.784805
TARGET-10-PASWXZ-09A-01R	2440	Alive	T lymphoblastic leukemia/lymphoma	2759	female	white	-1592.99	2073.92	0.780343
TARGET-10-PATRUN-09A-01R	101	Alive	T lymphoblastic leukemia/lymphoma	1763	male	white	-2213.77	949.304	0.913342
TARGET-10-PARBVI-09A-02R	1172	Dead	Precursor B-cell lymphoblastic leukemia	4948	female	white	-1989.01	1212.79	0.88184
TARGET-10-PATLNZ-09A-01R	1221	Alive	T lymphoblastic leukemia/lymphoma	3601	male	white	-1717.44	1824.12	0.813502
TARGET-10-PARFDL-09A-01R	3075	Alive	T lymphoblastic leukemia/lymphoma	7491	male	white	-1985.27	1110.53	0.888566
TARGET-10-PASNJI-09B-01R	2225	Alive	Precursor B-cell lymphoblastic leukemia	1370	male	Unknown	-1490.59	1474.52	0.823849
TARGET-10-PATAYT-09A-01R	2370	Alive	T lymphoblastic leukemia/lymphoma	2158	female	white	-1788.14	1541.15	0.842584
TARGET-10-PATBYK-09A-01R	743	Dead	T lymphoblastic leukemia/lymphoma	6000	female	black or african american	-1727.57	1411.41	0.84801
TARGET-10-PATGXS-09A-01R	2136	Alive	T lymphoblastic leukemia/lymphoma	5075	female	white	-1748.22	1272.27	0.860205
TARGET-10-PASPPN-09A-01R	252	Dead	T lymphoblastic leukemia/lymphoma	4593	male	not reported	-1586.76	1211	0.852613
TARGET-10-PAUAZV-09A-01R	1807	Alive	T lymphoblastic leukemia/lymphoma	3039	male	white	-1735.84	1994.16	0.800357
TARGET-10-PAPTLM-09A-01R	919	Dead	Precursor B-cell lymphoblastic leukemia	679	female	white	-1721.71	1310.23	0.855342
TARGET-10-PARWLP-09A-01R	2884	Alive	T lymphoblastic leukemia/lymphoma	2884	male	white	-1816.15	1531.12	0.845579
TARGET-10-PASZEW-09A-01R	2314	Alive	T lymphoblastic leukemia/lymphoma	2681	female	not reported	-1845.99	1254.28	0.868746
TARGET-10-PANLIC-09A-02R	4015	Alive	Precursor B-cell lymphoblastic leukemia	5421	female	white	-1588.49	1604.65	0.821158
TARGET-10-PARRKK-09A-01R	2752	Alive	T lymphoblastic leukemia/lymphoma	3244	male	white	-1616.83	2077.09	0.782237
TARGET-10-PARJLA-09B-01R	2912	Alive	Precursor B-cell lymphoblastic leukemia	3621	male	white	-1860.7	1354.88	0.862433
TARGET-10-PAPHYN-09B-01R	3012	Unknown	Precursor B-cell lymphoblastic leukemia	2079	male	white	-1422.87	1901.26	0.780576
TARGET-10-PARXCD-09B-01R	1326	Alive	Precursor B-cell lymphoblastic leukemia	5247	female	white	-1871.38	1582.04	0.845916
TARGET-10-PAUAYB-09A-01R	1834	Alive	T lymphoblastic leukemia/lymphoma	6682	male	asian	-2009.34	923.699	0.90234
TARGET-10-PASVPZ-09A-01R	2432	Alive	T lymphoblastic leukemia/lymphoma	1333	male	white	-1984.6	1318.87	0.874076
TARGET-10-PATNIA-09A-01R	2153	Alive	T lymphoblastic leukemia/lymphoma	2401	female	asian	-1795.8	1992.57	0.805741
TARGET-10-PARUFL-09B-01R	2859	Alive	Precursor B-cell lymphoblastic leukemia	1677	female	Unknown	-1524.08	2142.63	0.767551
TARGET-10-PASXMF-09A-01R	2359	Alive	T lymphoblastic leukemia/lymphoma	3815	male	native hawaiian or other pacific islander	-1876.59	1421.23	0.85866
TARGET-10-PAPIJM-09A-02R	1203	Alive	Precursor B-cell lymphoblastic leukemia	3979	male	white	-1854.65	1435.5	0.855924
TARGET-10-PASKXN-09A-01R	579	Alive	T lymphoblastic leukemia/lymphoma	3440	male	white	-2025.28	524.822	0.926897
TARGET-10-PANKGK-09A-01R	2034	Alive	Precursor B-cell lymphoblastic leukemia	4655	male	white	-1449.12	1847.15	0.787895
TARGET-10-PANEUH-09A-01R	4132	Alive	Precursor B-cell lymphoblastic leukemia	648	male	white	-1551.46	1967	0.786309
TARGET-10-PASPBU-09A-01R	2347	Alive	T lymphoblastic leukemia/lymphoma	5673	male	white	-1947.29	1290.79	0.873417
TARGET-10-PARGFL-09A-01R	1893	Dead	T lymphoblastic leukemia/lymphoma	1499	male	white	-1984.15	1283.83	0.876532
TARGET-10-PAPGYC-09A-01R	2003	Dead	Precursor B-cell lymphoblastic leukemia	1335	female	white	-1351.41	2795.86	0.6844
TARGET-10-PATIBE-09A-01R	2124	Alive	T lymphoblastic leukemia/lymphoma	4106	female	black or african american	-1866.73	1660.21	0.839371
TARGET-10-PAUACG-09A-01R	1777	Alive	T lymphoblastic leukemia/lymphoma	1807	male	white	-1715.35	802.615	0.891111
TARGET-10-PATHJF-09A-01R	2039	Unknown	T lymphoblastic leukemia/lymphoma	3743	female	white	-1369.01	2098.17	0.757044
TARGET-10-PASLBB-09A-01R	2478	Alive	T lymphoblastic leukemia/lymphoma	2874	male	white	-1799.24	1082.88	0.877662
TARGET-10-PAPHGD-09A-01R	3579	Alive	Precursor B-cell lymphoblastic leukemia	651	male	white	-1687.39	2055.51	0.790591
TARGET-10-PANKAK-09A-01R	1095	Dead	Precursor B-cell lymphoblastic leukemia	2342	male	white	-1734.13	1651.12	0.829378
TARGET-10-PANWEZ-09B-01R	3145	Unknown	Precursor B-cell lymphoblastic leukemia	5236	female	white	-1692.16	1146.43	0.865384
TARGET-10-PAPJHR-09A-01R	1186	Dead	Precursor B-cell lymphoblastic leukemia	4016	male	white	-1795.72	1567.48	0.841099
TARGET-10-PATKYI-09A-01R	2009	Alive	T lymphoblastic leukemia/lymphoma	7614	male	black or african american	-1489.23	1098.61	0.853751
TARGET-10-PANWYH-09B-01R	1418	Dead	Precursor B-cell lymphoblastic leukemia	1786	male	white	-1363.05	1783.47	0.785866
TARGET-10-PASSRP-09A-01R	1231	Alive	T lymphoblastic leukemia/lymphoma	1643	male	white	-1878.4	1693.32	0.837656
TARGET-10-PASUIN-09A-01R	2564	Alive	T lymphoblastic leukemia/lymphoma	5004	male	native hawaiian or other pacific islander	-2090.25	1226.81	0.887804
TARGET-10-PASHXL-09A-01R	2491	Alive	T lymphoblastic leukemia/lymphoma	4942	female	black or african american	-2034.21	1375.87	0.873549
TARGET-10-PAMXSP-09A-01R	4383	Alive	Precursor B-cell lymphoblastic leukemia	1223	male	white	-1233.79	2432.56	0.710243
TARGET-10-PASMGZ-09B-01R	2403	Alive	Precursor B-cell lymphoblastic leukemia	1646	female	white	-1723.64	1437.28	0.845683
TARGET-10-PANWYH-09A-02R	1418	Dead	Precursor B-cell lymphoblastic leukemia	1786	male	white	-1223.99	2122.51	0.740569
TARGET-10-PARFLV-09A-01R	334	Dead	Precursor B-cell lymphoblastic leukemia	5906	male	white	-1645.27	1999.17	0.791868
TARGET-10-PARNMV-09A-01R	2905	Alive	T lymphoblastic leukemia/lymphoma	3481	male	white	-1860.04	1614.24	0.84249
TARGET-10-PARFTR-09A-01R	465	Dead	Precursor B-cell lymphoblastic leukemia	2127	male	white	-1481.03	1945.77	0.781827
TARGET-10-PATGLV-09A-01R	2289	Alive	T lymphoblastic leukemia/lymphoma	2257	male	white	-1501.81	1587.14	0.815321
TARGET-10-PARPNM-09A-01R	233	Dead	Precursor B-cell lymphoblastic leukemia	4941	female	black or african american	-2053.44	1920.4	0.833458
TARGET-10-PATRNA-09A-01R	2079	Alive	T lymphoblastic leukemia/lymphoma	803	male	white	-1593.25	2285.6	0.760563
TARGET-10-PAPJHB-09A-01R	1870	Alive	Precursor B-cell lymphoblastic leukemia	2005	female	white	-1474.88	2083.28	0.768506
TARGET-10-PAMXHJ-09A-01R	4089	Alive	Precursor B-cell lymphoblastic leukemia	2219	male	white	-1595.72	2306.18	0.758835
TARGET-10-PASHDV-09A-01R	2671	Alive	T lymphoblastic leukemia/lymphoma	4257	male	white	-1702.06	1467.95	0.841565
TARGET-10-PASSSR-09A-01R	2463	Alive	T lymphoblastic leukemia/lymphoma	2878	male	asian	-2060.56	1555.51	0.862376
TARGET-10-PASJYI-09A-01R	2439	Alive	T lymphoblastic leukemia/lymphoma	5228	male	white	-1504.35	1805.07	0.796611
TARGET-10-PATWXC-09A-01R	1839	Alive	T lymphoblastic leukemia/lymphoma	5488	male	white	-1784.44	2087.44	0.796408
TARGET-10-PATYCH-09A-01R	1854	Alive	T lymphoblastic leukemia/lymphoma	1432	male	white	-1570.78	2365.06	0.750764
TARGET-10-PATRHL-09A-01R	2043	Alive	T lymphoblastic leukemia/lymphoma	2299	male	white	-1656.22	1950.17	0.797211
TARGET-10-PATLHS-09A-01R	1553	Unknown	T lymphoblastic leukemia/lymphoma	4004	male	white	-1845.92	1454.57	0.853806
TARGET-10-PAPBCI-09A-01R	3085	Dead	Precursor B-cell lymphoblastic leukemia	3625	male	white	-1484.86	1633.79	0.809881
TARGET-10-PARMRF-09A-01R	2989	Alive	T lymphoblastic leukemia/lymphoma	2186	male	white	-1556.53	2431.97	0.742842
TARGET-10-PANWHW-09A-01R	1916	Alive	Precursor B-cell lymphoblastic leukemia	1468	female	white	-1620.94	1314.93	0.847219
TARGET-10-PARLST-09A-01R	3058	Alive	T lymphoblastic leukemia/lymphoma	3448	male	white	-1160.94	2665.76	0.677912
TARGET-10-PATGZA-09A-01R	2184	Alive	T lymphoblastic leukemia/lymphoma	5253	female	white	-1243.75	2018.16	0.752688
TARGET-10-PAPBFN-09A-01R	1508	Dead	Precursor B-cell lymphoblastic leukemia	3976	male	white	-1567.79	2168.3	0.769246
TARGET-10-PASUGC-09A-01R	2411	Alive	T lymphoblastic leukemia/lymphoma	3515	male	white	-1868.99	1212.15	0.873442
TARGET-10-PASXSI-09A-01R	2420	Alive	T lymphoblastic leukemia/lymphoma	3272	male	not reported	-1929.56	1698.13	0.841352
TARGET-10-PATFWF-09A-01R	208	Alive	T lymphoblastic leukemia/lymphoma	6364	male	not reported	-1548.16	1918.17	0.790421
TARGET-10-PATMVH-09A-01R	2079	Alive	T lymphoblastic leukemia/lymphoma	6724	male	white	-2082.98	1663.89	0.85592
TARGET-10-PAPNNX-09A-02R	846	Dead	Precursor B-cell lymphoblastic leukemia	5486	male	black or african american	-1765.2	1281.2	0.860808
TARGET-10-PATMTV-09A-01R	2179	Alive	T lymphoblastic leukemia/lymphoma	4045	male	white	-1906.95	1497.06	0.855221
TARGET-10-PASFHR-09A-01R	2633	Alive	T lymphoblastic leukemia/lymphoma	5323	male	white	-1758.39	1639.96	0.832272
TARGET-10-PATEVE-09B-01R	2150	Alive	Precursor B-cell lymphoblastic leukemia	2758	male	white	-1922.63	742.61	0.908225
TARGET-10-PARJPL-09A-01R	3158	Alive	T lymphoblastic leukemia/lymphoma	1374	male	white	-1893.46	1759.47	0.833536
TARGET-10-PATXNR-09A-01R	1869	Alive	T lymphoblastic leukemia/lymphoma	6258	female	white	-2002.49	1632	0.852209
TARGET-10-PASTYT-09B-01R	2433	Alive	Precursor B-cell lymphoblastic leukemia	1106	male	white	-1766.82	1977.71	0.804512
TARGET-10-PATAXS-09A-01R	2252	Alive	T lymphoblastic leukemia/lymphoma	367	male	asian	-1437.28	2068.46	0.766362
TARGET-15-SJMPAL042943-09A-01R	740	Dead	Mixed phenotype acute leukemia with t(v;11q23); MLL rearranged	121	female	Unknown	-1500.95	2056.42	0.773455
TARGET-15-SJMPAL043774-09B-01R	156	Dead	Mixed phenotype acute leukemia with t(v;11q23); MLL rearranged	12	male	Unknown	-1179.27	2400.83	0.707884
TARGET-10-PASXUU-09A-01R	2306	Alive	T lymphoblastic leukemia/lymphoma	2562	male	white	-2045.89	1272.09	0.881672
TARGET-10-PARVMR-09A-01R	2841	Alive	T lymphoblastic leukemia/lymphoma	1811	male	not reported	-1877.49	1610.85	0.844134
TARGET-10-PATYMP-09A-01R	1759	Alive	T lymphoblastic leukemia/lymphoma	6742	male	not reported	-1936.23	1504.82	0.856854
TARGET-10-PATDBU-09A-01R	2334	Alive	T lymphoblastic leukemia/lymphoma	3551	male	white	-2026.18	1203.85	0.885011
TARGET-10-PATBGC-09A-01R	1841	Unknown	T lymphoblastic leukemia/lymphoma	3946	female	black or african american	-1576.09	1550.83	0.824613
TARGET-10-PARHBI-09A-01R	3010	Alive	T lymphoblastic leukemia/lymphoma	2883	male	white	-1735.24	1502.86	0.841427
TARGET-10-PARSZH-09A-01R	2400	Alive	Precursor B-cell lymphoblastic leukemia	4719	female	white	-1429.54	2724.14	0.700271
TARGET-10-PARXMC-09A-01R	2818	Alive	Precursor B-cell lymphoblastic leukemia	2526	female	Unknown	-1744.63	1507.65	0.841792
TARGET-10-PASXZH-09B-01R	2245	Alive	Precursor B-cell lymphoblastic leukemia	1182	male	white	-1405.49	1838.97	0.78468
TARGET-10-PATBDJ-09A-01R	2344	Alive	T lymphoblastic leukemia/lymphoma	5803	male	black or african american	-1540.06	2234.48	0.760366
TARGET-10-PASLAB-09A-01R	2517	Alive	T lymphoblastic leukemia/lymphoma	1757	female	white	-1905.77	1651.2	0.843183
TARGET-10-PASMIC-09A-01R	2500	Alive	T lymphoblastic leukemia/lymphoma	4916	female	white	-1922.95	1356.74	0.866886
TARGET-10-PASTSR-09B-01R	2482	Alive	Precursor B-cell lymphoblastic leukemia	3813	male	white	-2041.31	1098.03	0.893137
TARGET-10-PATMRE-09A-01R	2099	Alive	T lymphoblastic leukemia/lymphoma	2472	male	black or african american	-1504.73	1581.52	0.816046
TARGET-10-PANKAK-09A-02R	1095	Dead	Precursor B-cell lymphoblastic leukemia	2342	male	white	-1841.49	1353.4	0.861113
TARGET-10-PAUCDY-09A-01R	1793	Alive	T lymphoblastic leukemia/lymphoma	3632	male	white	-1492.21	2067.76	0.771582
TARGET-10-PASKAD-09A-01R	2536	Alive	T lymphoblastic leukemia/lymphoma	3809	female	white	-1574.57	2669.32	0.720909
TARGET-10-PARPUL-09A-01R	2825	Alive	T lymphoblastic leukemia/lymphoma	820	male	white	-1726	2379.11	0.76429
TARGET-10-PARBRK-09A-01R	99	Dead	Precursor B-cell lymphoblastic leukemia	2636	female	black or african american	-1477.87	2263.44	0.751608
TARGET-10-PATLHH-09A-01R	2162	Alive	T lymphoblastic leukemia/lymphoma	2830	male	white	-1914.38	1906.49	0.823168
TARGET-10-PATGWP-09A-01R	2203	Alive	T lymphoblastic leukemia/lymphoma	5192	male	black or african american	-1503.24	2066.52	0.772727
TARGET-10-PARACA-09A-01R	806	Dead	Precursor B-cell lymphoblastic leukemia	972	male	black or african american	-1712.68	2326.39	0.768007
TARGET-10-PAUCDC-09A-01R	1867	Alive	T lymphoblastic leukemia/lymphoma	6151	male	white	-1964.74	1277.25	0.875623
TARGET-10-PARDWN-09B-01R	3010	Alive	Precursor B-cell lymphoblastic leukemia	719	female	white	-1682.29	1627.96	0.82702
TARGET-10-PARFXJ-09A-01R	2988	Alive	T lymphoblastic leukemia/lymphoma	4245	male	white	-1623.31	1441.04	0.83743
TARGET-10-PARTLY-09A-01R	3058	Alive	T lymphoblastic leukemia/lymphoma	4492	male	white	-868.228	1980.15	0.719159
TARGET-10-PAPNNX-09A-01R	846	Dead	Precursor B-cell lymphoblastic leukemia	5486	male	black or african american	-1684.44	1548.76	0.833672
TARGET-10-PASTXU-09A-01R	2002	Unknown	T lymphoblastic leukemia/lymphoma	4711	female	native hawaiian or other pacific islander	-1912.44	1350.46	0.866577
TARGET-10-PAPECF-09A-01R	1290	Alive	Precursor B-cell lymphoblastic leukemia	785	female	white	-1411.88	3005.94	0.668224
TARGET-10-PATBTX-09A-01R	2185	Alive	T lymphoblastic leukemia/lymphoma	1152	male	white	-1173.97	2872.93	0.65669
TARGET-10-PAUBCT-09A-01R	1845	Alive	T lymphoblastic leukemia/lymphoma	4757	male	white	-878.831	2982.57	0.610748
TARGET-10-PANEHF-09A-01R	1299	Alive	Precursor B-cell lymphoblastic leukemia	5715	male	asian	-1575.07	1962.96	0.788811
TARGET-10-PANSFD-09A-01R	561	Dead	Precursor B-cell lymphoblastic leukemia	1987	male	white	-1387.13	2827.74	0.684811
TARGET-10-PANNGL-09A-01R	2514	Unknown	Precursor B-cell lymphoblastic leukemia	4694	female	white	-1602.44	1775.36	0.80781
TARGET-10-PALJDL-09A-01R	4750	Alive	Mixed phenotype acute leukemia, B/myeloid, NOS	1167	male	white	-1632.61	2033.44	0.787642
TARGET-10-PAMDRM-09A-01R	1213	Dead	Precursor B-cell lymphoblastic leukemia	2875	male	asian	-1543.6	2112.58	0.772195
TARGET-10-PASSPP-09A-01R	2386	Alive	T lymphoblastic leukemia/lymphoma	3642	male	not reported	-1984.96	1407.9	0.86768
TARGET-10-PASFLK-09A-01R	2675	Alive	T lymphoblastic leukemia/lymphoma	4390	male	white	-1372.98	1863.21	0.779488
TARGET-10-PAPAGK-09A-01R	3529	Alive	Precursor B-cell lymphoblastic leukemia	853	female	black or african american	-1767.64	2025.91	0.800362
TARGET-10-PATALJ-09A-01R	1902	Alive	T lymphoblastic leukemia/lymphoma	4669	male	black or african american	-1239.91	2455.67	0.708486
TARGET-10-PATHFE-09A-01R	2178	Alive	T lymphoblastic leukemia/lymphoma	4081	male	white	-1927.62	1267.65	0.873665
TARGET-10-PARLJA-09A-01R	2932	Alive	T lymphoblastic leukemia/lymphoma	3151	male	white	-1563.24	1531.63	0.825139
TARGET-10-PARXVS-09A-01R	2291	Dead	T lymphoblastic leukemia/lymphoma	4292	male	white	-1940.5	1481.48	0.858936
TARGET-10-PASHNK-09A-01R	2578	Alive	T lymphoblastic leukemia/lymphoma	2416	male	white	-2092.2	932.362	0.906981
TARGET-10-PARWID-09A-01R	2648	Alive	T lymphoblastic leukemia/lymphoma	7053	male	black or african american	-1770.55	1100.64	0.874373
TARGET-10-PATJBC-09A-01R	2203	Alive	T lymphoblastic leukemia/lymphoma	1948	male	white	-1898.29	1252.45	0.872655
TARGET-10-PATSIY-09A-01R	2090	Alive	T lymphoblastic leukemia/lymphoma	3404	male	white	-1947.8	864.379	0.9022
TARGET-10-PAPSPN-09A-01R	733	Dead	Precursor B-cell lymphoblastic leukemia	4173	male	white	-1473.86	2305.94	0.747088
TARGET-10-PASTHE-09A-01R	2543	Alive	T lymphoblastic leukemia/lymphoma	2327	female	asian	-1942.46	1301.96	0.872271
TARGET-10-PATDLG-09A-01R	2351	Alive	T lymphoblastic leukemia/lymphoma	4306	male	white	-1786.56	1585.89	0.838903
TARGET-10-PANRYM-09A-01R	1675	Alive	Precursor B-cell lymphoblastic leukemia	852	female	white	-1426.92	2548.43	0.718181
TARGET-10-PARSLL-09B-01R	2531	Alive	Precursor B-cell lymphoblastic leukemia	1652	female	white	-1505.33	1945.88	0.784036
TARGET-10-PAPBZK-09A-01R	790	Dead	Precursor B-cell lymphoblastic leukemia	6713	male	white	-1346.58	3293.61	0.6288
TARGET-10-PAPRMM-09B-01R	117	Dead	Precursor B-cell lymphoblastic leukemia	1374	male	white	-1598.73	1566.9	0.825158
TARGET-10-PAPJXI-09A-01R	3229	Alive	Precursor B-cell lymphoblastic leukemia	3250	female	white	-1402.27	2052.35	0.764577
TARGET-10-PASZIY-09A-01R	2369	Alive	T lymphoblastic leukemia/lymphoma	5234	male	white	-1818.9	1686.94	0.833372
TARGET-10-PANSUL-09A-01R	1068	Dead	Precursor B-cell lymphoblastic leukemia	886	male	white	-1703.28	1901.48	0.805616
TARGET-10-PASREU-09B-01R	2402	Alive	Precursor B-cell lymphoblastic leukemia	682	female	white	-1573.29	1733.88	0.808876
TARGET-10-PASSEF-09A-01R	2487	Alive	T lymphoblastic leukemia/lymphoma	1806	female	not reported	-1974.95	1418.04	0.866206
TARGET-10-PARKLK-09A-01R	29	Alive	T lymphoblastic leukemia/lymphoma	662	male	white	-1953.53	1300.35	0.87318
TARGET-10-PAUAFN-09A-01R	1854	Alive	T lymphoblastic leukemia/lymphoma	1437	male	not reported	-1883.17	1546.67	0.849588
TARGET-10-PASKSY-09A-01R	2367	Alive	T lymphoblastic leukemia/lymphoma	3552	male	white	-1385.48	2387.25	0.730299
TARGET-10-PASKTG-09A-01R	2128	Unknown	T lymphoblastic leukemia/lymphoma	2130	male	white	-2006.52	1462.01	0.865294
TARGET-10-PAPESW-09A-02R	3542	Alive	Precursor B-cell lymphoblastic leukemia	1054	female	white	-1454.41	2161.4	0.759166
TARGET-10-PAPEFH-09A-01R	852	Dead	Precursor B-cell lymphoblastic leukemia	2543	female	white	-1609.03	2102.44	0.779196
TARGET-10-PANATY-09B-01R	4077	Alive	Precursor B-cell lymphoblastic leukemia	1542	female	white	-1400.96	1955.25	0.773564
TARGET-10-PARMMV-09A-01R	3052	Alive	T lymphoblastic leukemia/lymphoma	2322	male	white	-1676.86	1798.27	0.812243
TARGET-10-PATMYZ-09A-01R	2108	Alive	T lymphoblastic leukemia/lymphoma	4421	male	white	-1548.71	1452.13	0.83049
TARGET-10-PARAPE-09B-01R	2991	Alive	Precursor B-cell lymphoblastic leukemia	1176	female	white	-1689.59	1774.96	0.815318
TARGET-10-PANDBX-09B-01R	1719	Dead	Precursor B-cell lymphoblastic leukemia	1398	female	white	-1380.94	2002.15	0.767302
TARGET-10-PATDFE-09A-01R	2365	Alive	T lymphoblastic leukemia/lymphoma	1835	female	white	-1687.32	2037.66	0.792186
TARGET-10-PATXSK-09A-01R	1991	Alive	T lymphoblastic leukemia/lymphoma	2279	male	white	-1704.16	1367.34	0.849613
TARGET-10-PAUBXP-09A-01R	1747	Alive	T lymphoblastic leukemia/lymphoma	3035	male	white	-1926.48	1432.11	0.861582
TARGET-10-PAPDKJ-09A-01R	1456	Dead	Precursor B-cell lymphoblastic leukemia	1449	male	black or african american	-1646.52	1903.18	0.800503
TARGET-10-PARVWD-09A-01R	255	Dead	Precursor B-cell lymphoblastic leukemia	6375	male	black or african american	-1591.97	1900.09	0.795953
TARGET-10-PARMFF-09A-01R	3189	Alive	T lymphoblastic leukemia/lymphoma	3039	male	white	-1288.75	2517.37	0.707152
TARGET-10-PATWJU-09A-01R	2013	Alive	T lymphoblastic leukemia/lymphoma	2127	male	white	-1929.71	1784.17	0.834471
TARGET-10-PASYIS-09A-01R	2288	Alive	T lymphoblastic leukemia/lymphoma	2937	female	white	-1702.19	1054.93	0.872755
TARGET-10-PATWIJ-09A-01R	1941	Alive	T lymphoblastic leukemia/lymphoma	5187	male	white	-1822.84	1570.23	0.843028
TARGET-10-PATFVG-09A-01R	2191	Alive	T lymphoblastic leukemia/lymphoma	2130	male	white	-1701.22	1557.51	0.834323
TARGET-10-PAUAJA-09A-01R	1875	Alive	T lymphoblastic leukemia/lymphoma	4343	male	not reported	-1694.28	1730.29	0.819491
TARGET-10-PAPEWB-09A-01R	3430	Alive	Precursor B-cell lymphoblastic leukemia	2606	female	white	-1527.8	1782.68	0.80066
TARGET-10-PASNEH-09A-01R	2579	Alive	T lymphoblastic leukemia/lymphoma	2167	male	white	-2024.38	1543.94	0.860542
TARGET-10-PAUBTC-09A-01R	1833	Alive	T lymphoblastic leukemia/lymphoma	667	female	not reported	-1853.09	1543.53	0.847496
TARGET-10-PANYGB-09A-01R	2110	Dead	Precursor B-cell lymphoblastic leukemia	2788	female	Unknown	-2101.07	1360.75	0.879343
TARGET-10-PARTKL-09A-02R	900	Dead	Precursor B-cell lymphoblastic leukemia	1089	female	white	-1546.62	1933.34	0.788916
TARGET-10-PATGKE-09A-01R	2006	Alive	T lymphoblastic leukemia/lymphoma	4202	male	white	-1606.74	2506.84	0.740414
TARGET-10-PAPDUV-09A-02R	3501	Alive	Precursor B-cell lymphoblastic leukemia	1986	female	asian	-1314.4	2098.45	0.751755
TARGET-10-PANYZE-09A-01R	3065	Dead	Precursor B-cell lymphoblastic leukemia	1479	female	white	-1632.65	1922.55	0.797569
TARGET-10-PARSJG-09A-01R	2737	Alive	T lymphoblastic leukemia/lymphoma	4371	male	white	-1663.16	1776.75	0.812913
TARGET-10-PATGYH-09A-01R	2154	Alive	T lymphoblastic leukemia/lymphoma	5959	male	black or african american	-1834.84	1357.8	0.860287
TARGET-10-PATBDK-09A-01R	2312	Alive	T lymphoblastic leukemia/lymphoma	2901	male	white	-1979.55	2009.25	0.820022
TARGET-10-PATJLT-09A-01R	2201	Alive	T lymphoblastic leukemia/lymphoma	4416	male	white	-1990.79	1140.91	0.886886
TARGET-10-PARNSP-09A-01R	3086	Alive	T lymphoblastic leukemia/lymphoma	2206	male	white	-2067.33	1032.57	0.899096
TARGET-10-PARIYD-09A-01R	3108	Alive	T lymphoblastic leukemia/lymphoma	3278	male	white	-1549.44	1988.14	0.784204
TARGET-10-PAPIRZ-09A-01R	1008	Dead	Precursor B-cell lymphoblastic leukemia	4892	female	white	-1819.75	2432.46	0.768101
TARGET-10-PATWYL-09A-01R	1838	Alive	T lymphoblastic leukemia/lymphoma	5586	male	white	-1718.83	1698.23	0.824225
TARGET-10-PANJPG-09A-01R	4072	Alive	Precursor B-cell lymphoblastic leukemia	4810	female	white	-1523.88	2215.01	0.760679
TARGET-10-PAPJIB-09A-01R	1344	Dead	Precursor B-cell lymphoblastic leukemia	903	female	white	-1478.39	2188.02	0.758914
TARGET-10-PASWZJ-09A-01R	2403	Alive	T lymphoblastic leukemia/lymphoma	1908	male	black or african american	-1885.76	869.468	0.897906
TARGET-10-PANSHK-09A-01R	2447	Dead	Precursor B-cell lymphoblastic leukemia	837	male	white	-1719.78	1853.1	0.811222
TARGET-10-PASUBW-09A-01R	474	Dead	Precursor B-cell lymphoblastic leukemia	5098	male	white	-1961.06	1206.97	0.880303
TARGET-10-PANPJI-09A-01R	4081	Alive	Precursor B-cell lymphoblastic leukemia	6270	female	asian	-1030.62	2045.66	0.728968
TARGET-10-PAPLUG-09A-01R	1155	Dead	Precursor B-cell lymphoblastic leukemia	506	male	Unknown	-1612.84	1736.51	0.81205
TARGET-10-PASHUP-09A-01R	2443	Alive	T lymphoblastic leukemia/lymphoma	3534	male	white	-1988.65	1969.34	0.824118
TARGET-10-PATXAL-09A-01R	235	Unknown	T lymphoblastic leukemia/lymphoma	5626	male	black or african american	-1853.42	1523.57	0.849073
TARGET-10-PAPFXN-09A-01R	1160	Alive	Precursor B-cell lymphoblastic leukemia	673	female	asian	-1341.24	2336.43	0.73096
TARGET-10-PARVEI-09A-01R	2769	Alive	T lymphoblastic leukemia/lymphoma	1253	female	white	-1823.8	1311.96	0.86288
TARGET-10-PARAYM-09A-01R	3399	Alive	T lymphoblastic leukemia/lymphoma	5569	male	white	-2045.26	947.211	0.903124
TARGET-10-PATSLH-09A-01R	1807	Alive	T lymphoblastic leukemia/lymphoma	824	male	white	-1843.74	1357.44	0.86098
TARGET-10-PASSHC-09A-01R	2483	Alive	T lymphoblastic leukemia/lymphoma	5570	male	white	-2167.89	1025.95	0.905871
TARGET-10-PANSXG-09A-02R	3830	Alive	Precursor B-cell lymphoblastic leukemia	2775	female	white	-1638.53	2104.52	0.781713
TARGET-10-PAPHMH-09A-02R	397	Dead	Precursor B-cell lymphoblastic leukemia	10946	female	white	-1644.27	1603.6	0.82589
TARGET-10-PARSET-09A-01R	356	Unknown	T lymphoblastic leukemia/lymphoma	3986	male	black or african american	-1370.23	2221.95	0.745168
TARGET-10-PATEFF-09A-01R	2114	Alive	T lymphoblastic leukemia/lymphoma	2366	male	white	-1785.91	1744.62	0.825941
TARGET-10-PAPFWH-09A-01R	819	Dead	Precursor B-cell lymphoblastic leukemia	6103	female	Unknown	-1332.43	2431.71	0.720448
TARGET-10-PANWHW-09A-02R	1916	Alive	Precursor B-cell lymphoblastic leukemia	1468	female	white	-1866.72	1214.83	0.873088
TARGET-10-PARASZ-09A-01R	3087	Alive	T lymphoblastic leukemia/lymphoma	1610	female	white	-1538.07	2109.02	0.772012
TARGET-10-PAREGZ-09A-01R	3087	Alive	T lymphoblastic leukemia/lymphoma	3128	female	white	-1338.9	1562.65	0.803389
TARGET-10-PANYEJ-09A-01R	3875	Alive	Precursor B-cell lymphoblastic leukemia	679	male	white	-912.468	1649.66	0.756273
TARGET-10-PATZFF-09A-01R	1832	Alive	T lymphoblastic leukemia/lymphoma	3906	female	white	-1746.97	1626.2	0.832462
TARGET-10-PATITB-09A-01R	2191	Alive	T lymphoblastic leukemia/lymphoma	5514	male	black or african american	-1475.99	1685.57	0.804627
TARGET-10-PARPRW-09A-01R	442	Dead	Precursor B-cell lymphoblastic leukemia	5479	female	Unknown	-1626.42	2319.05	0.760536
TARGET-10-PAPBSY-09A-01R	665	Dead	Precursor B-cell lymphoblastic leukemia	883	male	black or african american	-1747.48	1674.15	0.828583
TARGET-10-PANUHA-09A-01R	4017	Alive	Precursor B-cell lymphoblastic leukemia	1302	male	white	-1708.06	1445.54	0.84381
TARGET-10-PAPHZT-09A-01R	3393	Alive	Precursor B-cell lymphoblastic leukemia	551	female	white	-1452.79	2611.43	0.714378
TARGET-10-PARNXJ-09A-01R	2840	Alive	T lymphoblastic leukemia/lymphoma	1760	male	not reported	-1738.31	2129.49	0.788514
TARGET-10-PATDDZ-09A-01R	2183	Unknown	T lymphoblastic leukemia/lymphoma	4600	male	white	-1969.23	1380.73	0.868512
TARGET-10-PAPEJN-09A-01R	934	Dead	Precursor B-cell lymphoblastic leukemia	1129	male	Unknown	-1567.63	1717.99	0.809757
TARGET-10-PARFIH-09A-01R	1099	Alive	T lymphoblastic leukemia/lymphoma	1925	male	white	-1987	990.019	0.896654
TARGET-10-PANZPJ-09A-02R	953	Dead	Precursor B-cell lymphoblastic leukemia	4756	male	Unknown	-1337	2429.98	0.721089
TARGET-10-PASPDS-09A-01R	2626	Alive	T lymphoblastic leukemia/lymphoma	3990	male	not reported	-1855.47	1896.95	0.819031
TARGET-10-PANJWJ-09A-01R	3684	Alive	Precursor B-cell lymphoblastic leukemia	4018	male	white	-1073.99	2592.04	0.676483
TARGET-10-PATCDM-09A-01R	949	Dead	T lymphoblastic leukemia/lymphoma	1192	male	white	-1900.26	1440.24	0.859011
TARGET-10-PASDYM-09B-01R	2653	Alive	Precursor B-cell lymphoblastic leukemia	7209	male	white	-1912.66	1124.4	0.882671
TARGET-10-PATJZK-09A-01R	1335	Unknown	T lymphoblastic leukemia/lymphoma	6843	male	white	-1798.91	1693.99	0.831171
TARGET-10-PATZVD-09A-01R	1908	Alive	T lymphoblastic leukemia/lymphoma	1518	male	not reported	-1885.88	1193.34	0.875981
TARGET-10-PATFJP-09A-01R	2025	Alive	T lymphoblastic leukemia/lymphoma	3249	male	white	-1593.81	2314.75	0.757831
TARGET-10-PATFYZ-09A-01R	2317	Alive	T lymphoblastic leukemia/lymphoma	5624	male	white	-1560.15	2076.9	0.777044
TARGET-10-PARFPJ-09A-01R	2946	Alive	T lymphoblastic leukemia/lymphoma	1348	male	not reported	-1277.45	2423.28	0.715692
TARGET-10-PARJSR-09A-01R	853	Dead	Precursor B-cell lymphoblastic leukemia	4093	male	white	-1636.1	1448.66	0.837845
TARGET-10-PARJAY-09A-01R	2889	Alive	T lymphoblastic leukemia/lymphoma	5652	female	not reported	-1526.9	1771.09	0.801599
TARGET-10-PATRXL-09A-01R	1795	Alive	T lymphoblastic leukemia/lymphoma	1767	male	white	-1979.77	1051.61	0.892136
TARGET-10-PASINX-09A-01R	2516	Alive	T lymphoblastic leukemia/lymphoma	4148	male	white	-1586.52	2102.94	0.777074
TARGET-10-PARPET-09A-01R	1939	Unknown	T lymphoblastic leukemia/lymphoma	1811	female	black or african american	-1861.72	1627.66	0.84156
TARGET-10-PAPHZT-09B-01R	3393	Alive	Precursor B-cell lymphoblastic leukemia	551	female	white	-1410.41	2599.55	0.711238
TARGET-10-PAPVTA-09A-02R	3217	Alive	Precursor B-cell lymphoblastic leukemia	1020	male	white	-1537.42	1747.67	0.804568
TARGET-10-PATWHB-09A-01R	1914	Alive	T lymphoblastic leukemia/lymphoma	3904	female	white	-1629.91	1759.27	0.811562
TARGET-10-PAPKNC-09A-01R	1413	Dead	Precursor B-cell lymphoblastic leukemia	6599	male	black or african american	-1326.91	2455.82	0.717424
TARGET-10-PAPCUR-09A-01R	369	Dead	Precursor B-cell lymphoblastic leukemia	1098	female	white	-914.182	3304.62	0.576893
TARGET-10-PARNJB-09A-01R	3148	Alive	T lymphoblastic leukemia/lymphoma	8232	female	white	-1421.43	2263.38	0.746124
TARGET-10-PASWXB-09A-01R	2288	Alive	T lymphoblastic leukemia/lymphoma	3526	male	white	-1794.57	1493.72	0.846816
TARGET-10-PARWDM-09B-01R	821	Unknown	T lymphoblastic leukemia/lymphoma	5814	female	white	-1675.06	1814.8	0.81067
TARGET-10-PASKGG-09A-01R	33	Alive	T lymphoblastic leukemia/lymphoma	5682	male	white	-1573.48	1993.34	0.785918
TARGET-10-PANWHJ-09A-01R	3770	Alive	Precursor B-cell lymphoblastic leukemia	1131	male	white	-1566.91	2263.67	0.760143
TARGET-10-PATHBG-09A-01R	2176	Alive	T lymphoblastic leukemia/lymphoma	1081	female	white	-1236.96	1854.43	0.767654
TARGET-10-PARSNX-09A-01R	2077	Unknown	T lymphoblastic leukemia/lymphoma	4915	male	black or african american	-1663.7	2464.65	0.750117
TARGET-10-PARTJL-09A-02R	968	Alive	Precursor B-cell lymphoblastic leukemia	1060	female	white	-1541.07	2820.09	0.701902
TARGET-10-PARJZZ-09A-01R	993	Dead	Precursor B-cell lymphoblastic leukemia	1538	male	white	-1526.72	2853.66	0.696875
TARGET-10-PATITY-09A-01R	2156	Alive	T lymphoblastic leukemia/lymphoma	3125	male	white	-2151.89	685.417	0.925013
TARGET-10-PASEVJ-09B-01R	892	Dead	Precursor B-cell lymphoblastic leukemia	4086	female	Unknown	-1464.22	2096.24	0.766283
TARGET-10-PATMAF-09A-01R	1469	Unknown	T lymphoblastic leukemia/lymphoma	6011	male	white	-1626.43	1491.13	0.833642
TARGET-10-PASXIL-09A-01R	2493	Alive	T lymphoblastic leukemia/lymphoma	3222	male	white	-2316.13	1075.69	0.911901
TARGET-10-PARAKF-09A-01R	1942	Alive	Precursor B-cell lymphoblastic leukemia	3051	female	white	-1750.72	1853.97	0.813796
TARGET-10-PASFKA-09A-01R	2609	Alive	T lymphoblastic leukemia/lymphoma	4666	male	white	-1757.75	2030.94	0.799047
TARGET-10-PAPHJF-09A-01R	483	Dead	Precursor B-cell lymphoblastic leukemia	2511	female	white	-1610.89	1700.87	0.814926
TARGET-10-PAPVTA-09A-01R	3217	Alive	Precursor B-cell lymphoblastic leukemia	1020	male	white	-1560.94	1814.91	0.80074
TARGET-10-PANSPW-09A-01R	870	Dead	Precursor B-cell lymphoblastic leukemia	4798	male	asian	-1600.66	2580.49	0.732496
TARGET-10-PASTPT-09A-01R	2490	Alive	T lymphoblastic leukemia/lymphoma	1774	female	white	-1853.35	1360	0.861506
TARGET-10-PAPKNJ-09B-01R	3476	Alive	Precursor B-cell lymphoblastic leukemia	1577	female	white	-1708.71	1736.64	0.82017
TARGET-10-PATCJJ-09B-01R	2296	Alive	Precursor B-cell lymphoblastic leukemia	3777	female	white	-1585.04	1663.36	0.815917
TARGET-10-PATDMN-09A-01R	2323	Alive	T lymphoblastic leukemia/lymphoma	2526	male	white	-1758.29	1457.44	0.846816
TARGET-10-PATXNK-09A-01R	1865	Alive	T lymphoblastic leukemia/lymphoma	3428	male	white	-1971.79	1520.31	0.858369
TARGET-10-PASXUC-09A-01R	2238	Alive	T lymphoblastic leukemia/lymphoma	2490	female	asian	-2071.9	1164.87	0.890731
TARGET-10-PANSIA-09A-02R	3931	Alive	Precursor B-cell lymphoblastic leukemia	2041	female	white	-1337.08	2028.89	0.760614
TARGET-10-PANRWG-09A-01R	3769	Alive	Precursor B-cell lymphoblastic leukemia	978	male	white	-1297.99	2669.61	0.692155
TARGET-10-PATPDA-09A-01R	1815	Alive	T lymphoblastic leukemia/lymphoma	747	male	white	-1574.4	2103.03	0.775946
TARGET-10-PASJLN-09A-01R	2662	Alive	T lymphoblastic leukemia/lymphoma	3991	male	white	-1833.44	1898.29	0.817058
TARGET-10-PASRCV-09A-01R	2451	Alive	T lymphoblastic leukemia/lymphoma	1241	female	white	-1854.94	1623.75	0.841333
TARGET-10-PARWRJ-09B-01R	2915	Alive	Precursor B-cell lymphoblastic leukemia	383	female	Unknown	-1704.87	1783.23	0.815913
TARGET-10-PARNBN-09A-01R	1687	Unknown	T lymphoblastic leukemia/lymphoma	3674	male	not reported	-1448.47	1891.69	0.783793
TARGET-10-PASXLZ-09A-01R	2312	Alive	T lymphoblastic leukemia/lymphoma	1910	male	white	-1828.56	1411.07	0.855798
TARGET-10-PASWNU-09A-01R	2070	Alive	T lymphoblastic leukemia/lymphoma	5580	female	white	-2135.48	788.649	0.918198
TARGET-10-PASYCN-09A-01R	2313	Alive	T lymphoblastic leukemia/lymphoma	4009	male	white	-1684.75	2348.71	0.763262
TARGET-10-PATGVX-09A-01R	2305	Alive	T lymphoblastic leukemia/lymphoma	2668	male	white	-1690.71	1317.01	0.852455
TARGET-10-PARJNX-09A-01R	3006	Alive	T lymphoblastic leukemia/lymphoma	1131	female	black or african american	-1789.6	1118.94	0.874427
TARGET-10-PARZYX-09B-01R	2766	Alive	Precursor B-cell lymphoblastic leukemia	4164	male	white	-1932.57	1248.35	0.875391
TARGET-10-PASKIC-09A-01R	2710	Alive	T lymphoblastic leukemia/lymphoma	4092	male	white	-2103.12	1224.59	0.888821
TARGET-10-PARHBT-09A-01R	2956	Alive	T lymphoblastic leukemia/lymphoma	6213	male	white	-1752.98	1689.49	0.827774
TARGET-10-PATZYC-09A-01R	1882	Alive	T lymphoblastic leukemia/lymphoma	1350	male	white	-1683.49	2017.42	0.793654
TARGET-10-PARTBP-09A-01R	3083	Alive	T lymphoblastic leukemia/lymphoma	2057	male	white	-1716.25	1717.8	0.82238
TARGET-10-PATYWV-09A-01R	1649	Dead	T lymphoblastic leukemia/lymphoma	2799	male	white	-1765.84	1934.05	0.808217
TARGET-10-PATRAB-09A-01R	2146	Alive	T lymphoblastic leukemia/lymphoma	1707	female	white	-1751.87	2090.44	0.793239
TARGET-10-PAPZNK-09A-01R	883	Dead	Precursor B-cell lymphoblastic leukemia	3658	female	black or african american	-1988.17	2078.38	0.814906
TARGET-10-PANLIC-09A-01R	4015	Alive	Precursor B-cell lymphoblastic leukemia	5421	female	white	-1485.84	1834.13	0.79237
TARGET-10-PATGMP-09A-01R	2180	Alive	T lymphoblastic leukemia/lymphoma	3924	male	white	-1525.75	2341.72	0.748657
TARGET-10-PARUAT-09B-01R	2964	Alive	Precursor B-cell lymphoblastic leukemia	912	female	white	-1620.37	1844.81	0.803329
TARGET-15-SJMPAL044950-09A-01R	301	Dead	Mixed phenotype acute leukemia with t(v;11q23); MLL rearranged	41	male	Unknown	-809.468	2788.11	0.625184
TARGET-10-PASVIN-09A-01R	2428	Alive	T lymphoblastic leukemia/lymphoma	2619	male	white	-1739.74	1583.89	0.835304
TARGET-15-SJMPAL040026-09A-01R	30	Dead	Mixed phenotype acute leukemia with t(v;11q23); MLL rearranged	182	male	Unknown	-991.986	2290.72	0.699837
TARGET-15-SJMPAL017977-09A-01R	1	Dead	Mixed phenotype acute leukemia with t(v;11q23); MLL rearranged	54	female	Unknown	-362.689	2917.68	0.556998
TARGET-15-SJMPAL041122-09A-01R	323	Alive	Mixed phenotype acute leukemia with t(v;11q23); MLL rearranged	486	female	Unknown	-1141.62	2053.27	0.739273
TARGET-10-PATEVL-09A-01R	2339	Alive	T lymphoblastic leukemia/lymphoma	1228	male	black or african american	-1818.57	1796.46	0.82435
TARGET-10-PATFRM-09A-01R	2203	Alive	T lymphoblastic leukemia/lymphoma	6696	male	white	-444.837	2840.68	0.576245
TARGET-10-PARUGP-09A-01R	289	Dead	Precursor B-cell lymphoblastic leukemia	759	male	white	-1957.14	1778.6	0.837131
TARGET-10-PASIIY-09A-01R	1370	Unknown	T lymphoblastic leukemia/lymphoma	2171	male	white	-1947.03	1091.03	0.887301
TARGET-10-PAUBPY-09A-01R	1837	Alive	T lymphoblastic leukemia/lymphoma	4219	male	not reported	-1706.82	1599.9	0.831334
TARGET-10-PASIZE-09B-01R	1699	Unknown	Precursor B-cell lymphoblastic leukemia	569	male	white	-1487.56	1808.96	0.794771
TARGET-10-PATLRZ-09A-01R	2025	Alive	T lymphoblastic leukemia/lymphoma	5105	male	white	-1573.87	2370.93	0.750495
TARGET-10-PATCUK-09A-01R	2244	Alive	T lymphoblastic leukemia/lymphoma	4397	male	white	-1823.07	1982.5	0.808975
TARGET-10-PASXFY-09B-01R	2176	Alive	Precursor B-cell lymphoblastic leukemia	949	female	white	-1554.22	2020.52	0.781684
TARGET-10-PASHUI-09A-02R	605	Dead	Precursor B-cell lymphoblastic leukemia	1865	male	white	-1397.49	2469.92	0.723176
TARGET-10-PANSBR-09A-01R	1688	Dead	Precursor B-cell lymphoblastic leukemia	7519	male	white	-1556.84	2082.23	0.776245
TARGET-10-PANKMB-09A-02R	4175	Alive	Precursor B-cell lymphoblastic leukemia	3000	female	white	-1429.8	2488.56	0.72456
TARGET-10-PATKGP-09A-01R	2167	Alive	T lymphoblastic leukemia/lymphoma	3861	female	white	-1670.34	1776.41	0.813554
TARGET-10-PARMIH-09A-01R	2953	Dead	T lymphoblastic leukemia/lymphoma	4537	male	not reported	-1797.43	1293.91	0.862263
TARGET-10-PARWMF-09A-01R	2668	Alive	T lymphoblastic leukemia/lymphoma	4275	male	white	-1682.88	1267.95	0.855604
TARGET-10-PAPIGX-09A-02R	644	Alive	Precursor B-cell lymphoblastic leukemia	5231	female	black or african american	-1418.94	2386.84	0.733687
TARGET-10-PASXLT-09A-01R	2419	Alive	T lymphoblastic leukemia/lymphoma	1491	male	white	-1523.72	2004.12	0.780391
TARGET-10-PAPDUF-09A-01R	3669	Alive	Precursor B-cell lymphoblastic leukemia	1217	male	white	-1437.66	2497.2	0.724481
TARGET-10-PASTDU-09A-01R	2507	Alive	T lymphoblastic leukemia/lymphoma	3236	male	not reported	-1856.24	1013.44	0.886406
TARGET-10-PATRGV-09A-01R	1679	Dead	T lymphoblastic leukemia/lymphoma	577	female	white	-1625.43	1769.23	0.810322
TARGET-10-PAPTAT-09B-01R	3262	Alive	Precursor B-cell lymphoblastic leukemia	928	male	white	-1533.11	1821.92	0.797666
TARGET-10-PASJMK-09A-01R	2646	Alive	T lymphoblastic leukemia/lymphoma	2300	female	not reported	-1533.81	1840.59	0.796072
TARGET-10-PASILP-09B-01R	1059	Dead	Precursor B-cell lymphoblastic leukemia	3627	male	white	-1520.39	2285.44	0.753591
TARGET-10-PASMNV-09A-01R	2495	Alive	T lymphoblastic leukemia/lymphoma	4662	male	white	-1921.43	1653.2	0.84426
TARGET-10-PASMHF-09A-01R	2531	Alive	T lymphoblastic leukemia/lymphoma	4410	female	white	-1709.42	1988.94	0.798487
TARGET-10-PATEAK-09A-01R	2340	Alive	T lymphoblastic leukemia/lymphoma	6551	male	asian	-1881.39	2004.62	0.812087
TARGET-10-PATFJD-09A-01R	2295	Alive	T lymphoblastic leukemia/lymphoma	920	female	white	-1849.9	1056.15	0.88305
TARGET-10-PAPIJM-09A-01R	1203	Alive	Precursor B-cell lymphoblastic leukemia	3979	male	white	-1798.28	1722.7	0.828769
TARGET-10-PATDKT-09A-01R	2305	Alive	T lymphoblastic leukemia/lymphoma	8169	male	white	-1819.59	1005.77	0.884429
TARGET-10-PAPAXK-09B-01R	3790	Alive	Precursor B-cell lymphoblastic leukemia	3491	male	white	-1581.8	1722.77	0.810565
TARGET-10-PARVHY-09A-01R	2948	Alive	T lymphoblastic leukemia/lymphoma	5718	male	white	-1571.17	1952.37	0.789414
TARGET-10-PATEYS-09A-01R	1932	Alive	T lymphoblastic leukemia/lymphoma	1912	male	black or african american	-1820.09	1950.75	0.81145
TARGET-10-PAPRFE-09A-01R	391	Dead	Precursor B-cell lymphoblastic leukemia	940	female	white	-1904.21	1236.73	0.874201
TARGET-10-PARWNW-09A-01R	2324	Unknown	T lymphoblastic leukemia/lymphoma	4366	male	white	-1907.62	1172.12	0.879006
TARGET-10-PATCZN-09A-01R	2302	Alive	T lymphoblastic leukemia/lymphoma	1806	female	white	-1842.99	2129.04	0.797909
TARGET-10-PANTSM-09A-01R	1214	Dead	Precursor B-cell lymphoblastic leukemia	2591	male	white	-1628.66	1943.05	0.795396
TARGET-10-PASWSR-09A-01R	2316	Alive	T lymphoblastic leukemia/lymphoma	1249	female	white	-1755.48	1820.16	0.817073
TARGET-10-PATZSL-09A-01R	1897	Alive	T lymphoblastic leukemia/lymphoma	3663	female	asian	-1992.03	1071.04	0.89166
TARGET-10-PARUNW-09B-01R	2790	Alive	Precursor B-cell lymphoblastic leukemia	503	female	asian	-1426.56	1845.25	0.786023
TARGET-10-PARHES-09A-01R	2940	Alive	T lymphoblastic leukemia/lymphoma	1698	male	black or african american	-1527.02	1715.84	0.806432
TARGET-10-PASYHN-09A-01R	1023	Unknown	T lymphoblastic leukemia/lymphoma	6367	male	white	-1936.7	1513.89	0.856202
TARGET-10-PATCKV-09A-01R	2406	Alive	T lymphoblastic leukemia/lymphoma	5266	male	white	-1753.74	1506.65	0.842593
TARGET-10-PARJXW-09A-01R	35	Alive	T lymphoblastic leukemia/lymphoma	5413	male	white	-1984.77	1291.66	0.876021
TARGET-10-PARXLS-09A-01R	2756	Alive	T lymphoblastic leukemia/lymphoma	1601	male	white	-1869.24	785.104	0.902245
TARGET-10-PATLGU-09A-01R	2183	Alive	T lymphoblastic leukemia/lymphoma	2578	male	asian	-1423.66	2130.49	0.759182
TARGET-10-PASYSJ-09A-01R	2126	Alive	T lymphoblastic leukemia/lymphoma	5379	male	white	-1587.31	2182.69	0.769727
TARGET-10-PARNEH-09A-01R	524	Dead	T lymphoblastic leukemia/lymphoma	1463	male	white	-1507.47	1454.54	0.826903
TARGET-10-PATMXN-09A-01R	1191	Alive	T lymphoblastic leukemia/lymphoma	5450	male	white	-1554.7	1533.18	0.824302
TARGET-10-PASKAY-09A-01R	487	Dead	Precursor B-cell lymphoblastic leukemia	585	male	black or african american	-1683.6	2383.75	0.759819
TARGET-10-PASUSV-09A-01R	2552	Alive	T lymphoblastic leukemia/lymphoma	3127	male	white	-2020.3	1642.78	0.852748
TARGET-10-PATGBY-09A-01R	2334	Alive	T lymphoblastic leukemia/lymphoma	7715	male	white	-1804.97	1341.56	0.859265
TARGET-10-PARPYJ-09A-01R	2759	Alive	T lymphoblastic leukemia/lymphoma	2719	female	white	-1722.56	1450.39	0.84457
TARGET-10-PASGFH-09A-01R	1206	Alive	T lymphoblastic leukemia/lymphoma	6488	male	black or african american	-1821.29	1384.68	0.857246
TARGET-10-PATPGE-09A-01R	2009	Alive	T lymphoblastic leukemia/lymphoma	7204	male	white	-1572.08	1904.97	0.793747
TARGET-10-PATCNI-09A-01R	2400	Alive	T lymphoblastic leukemia/lymphoma	1682	female	black or african american	-1944.33	1572.88	0.852283
TARGET-10-PATAAH-09B-01R	2161	Alive	Precursor B-cell lymphoblastic leukemia	6604	male	white	-1579.16	1609.01	0.82001
TARGET-10-PAPMVB-09A-02R	1413	Dead	Precursor B-cell lymphoblastic leukemia	699	male	white	-1482.83	1918.09	0.784518
TARGET-10-PATLNS-09A-01R	2086	Alive	T lymphoblastic leukemia/lymphoma	823	female	black or african american	-1800.15	1185.66	0.870398
TARGET-10-PASWFN-09A-01R	2395	Alive	T lymphoblastic leukemia/lymphoma	4136	male	black or african american	-868.794	2508.89	0.663182
TARGET-10-PAPRCS-09A-01R	460	Dead	Precursor B-cell lymphoblastic leukemia	5147	male	white	-1608.53	2128.71	0.776727
TARGET-10-PATKVD-09A-01R	2151	Alive	T lymphoblastic leukemia/lymphoma	904	male	white	-1644.32	2119.98	0.780826
TARGET-10-PANTTZ-09B-01R	3642	Alive	Precursor B-cell lymphoblastic leukemia	948	female	white	-1617.88	1592.86	0.824593
TARGET-10-PATENL-09A-01R	605	Dead	T lymphoblastic leukemia/lymphoma	1345	male	white	-1860.67	1897.89	0.81939
TARGET-10-PAUBLL-09A-01R	1914	Alive	T lymphoblastic leukemia/lymphoma	2617	female	black or african american	-1644.37	1756.67	0.813022
TARGET-10-PANWVW-09A-01R	3567	Alive	Precursor B-cell lymphoblastic leukemia	1077	male	white	-1569.92	2061.61	0.779354
TARGET-10-PARYAJ-09B-01R	2697	Dead	Precursor B-cell lymphoblastic leukemia	425	male	white	-1766.76	1713.32	0.826946
TARGET-10-PASNTZ-09A-01R	2486	Alive	T lymphoblastic leukemia/lymphoma	2627	male	not reported	-1687.27	1852.63	0.808463
TARGET-10-PARMKK-09A-01R	3003	Alive	T lymphoblastic leukemia/lymphoma	1222	male	black or african american	-1967.59	1884.89	0.829353
TARGET-10-PASJJR-09A-01R	2503	Alive	T lymphoblastic leukemia/lymphoma	5216	male	white	-1613.68	1900.92	0.797805
TARGET-10-PANWFB-09A-01R	2939	Alive	Precursor B-cell lymphoblastic leukemia	6297	female	asian	-1489.97	1758.01	0.799502
TARGET-10-PARARJ-09A-01R	455	Dead	Precursor B-cell lymphoblastic leukemia	1129	female	white	-1649.38	1894.64	0.801505
TARGET-10-PARTPW-09A-01R	2750	Alive	T lymphoblastic leukemia/lymphoma	5483	male	asian	-2017.23	833.722	0.908439
TARGET-10-PATHRF-09A-01R	2289	Alive	T lymphoblastic leukemia/lymphoma	1889	male	white	-1865.51	1547.27	0.848171
TARGET-10-PANUUF-09A-02R	3911	Alive	Precursor B-cell lymphoblastic leukemia	4029	female	black or african american	-1330	1941.63	0.768202
TARGET-10-PARIZN-09A-01R	673	Dead	T lymphoblastic leukemia/lymphoma	3724	male	white	-1693.59	1692.58	0.822594
TARGET-10-PATEMI-09A-01R	2172	Alive	T lymphoblastic leukemia/lymphoma	6491	female	white	-1528.38	2077.08	0.774084
TARGET-10-PAPZST-09A-01R	859	Alive	Precursor B-cell lymphoblastic leukemia	5491	female	white	-1013.77	3102.8	0.612455
TARGET-10-PAPGFP-09A-02R	945	Dead	Precursor B-cell lymphoblastic leukemia	3519	female	white	-1423.4	1445.74	0.82064
TARGET-10-PARUKW-09A-01R	2701	Alive	T lymphoblastic leukemia/lymphoma	3576	female	white	-1604.96	1897.92	0.797299
TARGET-10-PARMSP-09A-01R	584	Dead	Precursor B-cell lymphoblastic leukemia	6555	male	white	-1551.34	2044.62	0.779208
TARGET-10-PASILW-09A-01R	1664	Dead	T lymphoblastic leukemia/lymphoma	4535	female	white	-1598.55	2300.66	0.759633
TARGET-10-PARLAF-09A-01R	2939	Alive	Precursor B-cell lymphoblastic leukemia	1449	male	black or african american	-1577.57	2060.6	0.78015
TARGET-10-PASKCL-09B-01R	2539	Alive	T lymphoblastic leukemia/lymphoma	4631	male	white	-1934.53	1078.61	0.887295
TARGET-10-PAPAIZ-09A-01R	3632	Alive	Precursor B-cell lymphoblastic leukemia	2356	female	white	-1716.94	2018.58	0.796529
TARGET-10-PATYJK-09A-01R	1955	Alive	T lymphoblastic leukemia/lymphoma	4451	male	white	-1281.26	1834.17	0.773692
TARGET-10-PASTLP-09A-01R	2240	Alive	T lymphoblastic leukemia/lymphoma	3420	male	white	-1872.55	1095.11	0.881924
TARGET-10-PANXDR-09A-01R	3801	Alive	Precursor B-cell lymphoblastic leukemia	1189	male	Unknown	-1695.49	2063.27	0.790622
TARGET-10-PATEIT-09A-01R	605	Dead	T lymphoblastic leukemia/lymphoma	3485	female	white	-1969.78	1679.17	0.846016
TARGET-10-PATNAM-09A-01R	2156	Alive	T lymphoblastic leukemia/lymphoma	814	female	not reported	-1671.08	1987.5	0.795215
TARGET-10-PAPLTZ-09A-01R	2585	Dead	Precursor B-cell lymphoblastic leukemia	2030	male	white	-1674.51	1449.53	0.84084
TARGET-10-PATBRV-09A-01R	213	Dead	T lymphoblastic leukemia/lymphoma	3054	female	white	-1890.44	1684.67	0.839311
TARGET-10-PATTHR-09A-01R	2041	Alive	T lymphoblastic leukemia/lymphoma	5917	male	asian	-1535.74	2112.94	0.771428
TARGET-10-PATDGZ-09A-01R	2324	Alive	T lymphoblastic leukemia/lymphoma	937	male	white	-1639.56	1778.44	0.810745
TARGET-10-PATHWV-09A-01R	2253	Alive	T lymphoblastic leukemia/lymphoma	3127	male	white	-2060.26	1158.4	0.890386
TARGET-10-PARMWH-09A-01R	3089	Alive	T lymphoblastic leukemia/lymphoma	7513	female	not reported	-1865.64	1502.6	0.851637
TARGET-10-PANSDA-09A-02R	1141	Dead	Precursor B-cell lymphoblastic leukemia	4616	female	white	-1260.42	2002.58	0.755795
TARGET-10-PATKWU-09A-01R	2083	Alive	T lymphoblastic leukemia/lymphoma	4834	male	white	-1836.58	943.018	0.88983
TARGET-10-PARPHB-09A-01R	2960	Alive	T lymphoblastic leukemia/lymphoma	400	male	white	-1912.32	1215.25	0.876302
TARGET-10-PASSZA-09A-01R	2496	Alive	T lymphoblastic leukemia/lymphoma	5416	male	white	-1926.76	1777.51	0.834771
TARGET-10-PAPNMY-09A-01R	1967	Dead	Precursor B-cell lymphoblastic leukemia	5109	male	white	-1821.45	1989.81	0.808204
TARGET-10-PASRMM-09A-01R	2485	Alive	T lymphoblastic leukemia/lymphoma	1595	male	white	-1911.52	872.861	0.899347
TARGET-10-PATSIL-09A-01R	2030	Alive	T lymphoblastic leukemia/lymphoma	5700	male	white	-1728.67	1588.97	0.833998
TARGET-10-PATCTI-09A-01R	482	Dead	Precursor B-cell lymphoblastic leukemia	2414	male	white	-1597.34	2112.03	0.777234
TARGET-10-PATWYZ-09A-01R	1973	Alive	T lymphoblastic leukemia/lymphoma	1385	male	white	-2005.25	1363.86	0.872335
TARGET-10-PAUBCB-09A-01R	1870	Alive	T lymphoblastic leukemia/lymphoma	5623	male	white	-2053.75	1390.87	0.873873
TARGET-10-PATBNT-09A-01R	2156	Alive	T lymphoblastic leukemia/lymphoma	4938	male	white	-2037.53	909.744	0.904989
TARGET-10-PASYAJ-09A-01R	2426	Alive	T lymphoblastic leukemia/lymphoma	1113	male	black or african american	-1595.08	2591.93	0.730792
TARGET-10-PARUEU-09A-01R	2247	Unknown	T lymphoblastic leukemia/lymphoma	2036	male	white	-1645.12	1326.36	0.848211
TARGET-10-PARBVI-09A-01R	1172	Dead	Precursor B-cell lymphoblastic leukemia	4948	female	white	-1764.74	1780.1	0.821226

## Sheet: Validation cohort 
Table S1. Patients' ID and clinical characteristics.
ID	Days_to_last_follow_up	Vital_status	Immunophenotype	Age	Gender	Race	TumorPurity
TARGET-15-SJMPAL042801-09B-01R	1169	0	Unknown	1963	Male	Unknown	0.792772
TARGET-15-SJMPAL042787-09B-01R	60	1	Unknown	4941	Female	Unknown	0.82526
TARGET-15-SJMPAL043770-09B-01R	662	0	Unknown	2716	Male	Unknown	0.781493
TARGET-15-SJMPAL012421-09B-01R	1718	0	Unknown	4484	Female	Unknown	0.804841
TARGET-15-SJMPAL043505-09B-01R	1562	1	Unknown	1270	Male	Unknown	0.721342
TARGET-15-SJMPAL041120-09B-01R	880	1	Unknown	5407	Female	Unknown	0.787562
TARGET-15-SJMPAL042799-09B-01R	486	1	Unknown	4090	Male	Unknown	0.751419
TARGET-15-SJMPAL042791-09B-01R	895	0	Unknown	4824	Female	Unknown	0.707085
TARGET-15-SJMPAL012419-09B-01R	1229	0	Unknown	5973	Male	Unknown	0.806172
TARGET-15-SJMPAL040028-04B-01R	1	0	Unknown	6265	Female	Unknown	0.745785
TARGET-15-SJMPAL041117-09B-01R	599	0	Unknown	5523	Male	Unknown	0.667076
TARGET-15-SJMPAL041119-09B-01R	469	1	Unknown	1105	Male	Unknown	0.732879
TARGET-15-SJMPAL040459-09B-01R	892	0	Unknown	2569	Female	Unknown	0.699612
TARGET-15-SJMPAL042794-09B-01R	25	1	Unknown	5541	Male	Unknown	0.720641
TARGET-15-SJMPAL011914-09B-01R	2813	0	Unknown	2613	Male	Unknown	0.738741
TARGET-10-PAPDUV-04A-02R	1524	0	Unknown	1986	Female	Asian	0.776512
TARGET-15-PARWPU-09B-01R	1814	0	Unknown	2129	Male	Unknown	0.739941
TARGET-10-PAPDUV-09A-02R	1524	0	Unknown	1986	Female	Asian	0.741241
TARGET-15-SJMPAL043512-09B-01R	1097	0	Unknown	5664	Female	Unknown	0.78481
TARGET-15-PAREAT-09B-01R	1	1	Unknown	2399	Male	Unknown	0.665559
TARGET-15-SJMPAL042793-09B-01R	546	0	Unknown	1757	Female	Unknown	0.692869
TARGET-15-SJMPAL042798-09B-01R	443	1	Unknown	1751	Male	Unknown	0.661988
TARGET-15-SJMPAL043508-09B-01R	1806	1	Unknown	3505	Female	Unknown	0.784682
TARGET-15-SJMPAL040037-09B-01R	963	0	Unknown	5594	Male	Unknown	0.605181
TARGET-10-PAPEJN-09A-01R	342	1	Unknown	1129	Male	Unknown	0.797534
TARGET-10-PANZPJ-04A-01R	932	1	Unknown	4756	Male	Unknown	0.649874
TARGET-15-SJMPAL040038-09B-01R	1167	0	Unknown	948	Female	Unknown	0.83208
TARGET-15-SJMPAL016342-09B-01R	295	1	Unknown	335	Male	Unknown	0.716261
TARGET-15-SJMPAL042946-04B-01R	320	1	Unknown	5588	Female	Unknown	0.709942
TARGET-10-PANSHK-09A-01R	1354	1	Unknown	837	Male	White	0.797591
TARGET-10-PARBGL-09B-01R	1443	0	B-ALL	1187	Female	White	0.777222
TARGET-15-SJMPAL040025-09B-01R	2130	0	Unknown	3319	Female	Unknown	0.773867
TARGET-10-PANZPJ-09A-02R	932	1	Unknown	4756	Male	Unknown	0.710548
TARGET-10-PARMSP-04A-01R	441	1	Unknown	6555	Male	White	0.769298
TARGET-15-SJMPAL043775-09B-01R	838	0	Unknown	699	Male	Unknown	0.640707
TARGET-10-PANYGB-09A-01R	1321	1	Unknown	2788	Female	Unknown	0.880393
TARGET-10-PANYGB-04A-01R	1321	1	Unknown	2788	Female	Unknown	0.869909
TARGET-10-PAPEJN-04A-01R	342	1	Unknown	1129	Male	Unknown	0.761952
TARGET-10-PAPHJF-04A-01R	282	1	Unknown	2511	Female	White	0.829802
TARGET-15-SJMPAL043771-09B-01R	780	0	Unknown	3542	Female	Unknown	0.579986
TARGET-10-PARMSP-09A-01R	441	1	Unknown	6555	Male	White	0.775113
TARGET-10-PAPHJF-09A-01R	282	1	Unknown	2511	Female	White	0.807442
TARGET-10-PAKSWW-04A-01R	532	1	B-ALL	5516	Male	White	0.525203
