# Supplementary material for: Identification of immune and stromal cell infiltration-related gene signature for prognosis prediction in acute lymphoblastic leukemia
Source: Aging (Albany NY). 2022 Sep 19;14(18):7470–504. doi: 10.18632/aging.204292 (PMC9550239; doi:10.18632/aging.204292)
Supplement: Supplementary Table 5 [file aging-14-204292-s005.xlsx]

## Sheet: CIBERSORTx_Job5_cell_type_sourc
Supplementary Table 5. Signature matrix file.
genesymbols	B	HSPC	NK	T	Myeloid	DC	Erythroblast
A1BG	65.9617	38.6098	1	45.7033	79.956	44.2473	1
A1BG.AS1	1	1	1	1	1	1	1
A2M	1	1	1	1	1	1	1
A2M.AS1	1	1	1	1	1	1	1
A2ML1	1	1	1	1	1	1	1
A4GALT	1	1	1	1	1	1	44.169
AAAS	1	1	1	1	1	1	31.0503
AACS	1	1	1	1	1	1	1
AADACL2	1	1	1	1	1	1	1
AADACL4	1	1	1	1	1	1	1
AADAT	1	1	1	1	1	1	1
AAED1	1	40.6306	1	1	48.1002	40.5298	1
AAGAB	1	1	1	1	1	1	1
AAK1	81.1363	38.6639	257.235	257.758	117.988	58.8578	1
AAMDC	1	46.3879	1	1	1	1	19.1998
AAMP	71.6522	54.5045	65.7022	1	40.5413	64.8324	29.7631
AANAT	1	1	1	1	1	1	1
AAR2	1	1	1	1	1	1	1
AARD	1	1	1	1	1	1	1
AARS	1	1	1	1	1	1	1
AARS2	1	1	1	1	1	1	1
AARSD1	1	1	1	1	1	1	1
AASDH	1	1	1	1	1	1	1
AASDHPPT	51.0058	35.5763	1	1	1	1	1
AASS	1	1	1	1	1	1	1
AATBC	1	1	1	1	1	1	1
AATF	62.9081	31.4703	75.1617	44.1557	1	47.7605	30.3171
AATK	1	1	1	1	1	1	1
AB019440.50	1	1	1	1	1	1	1
ABALON	1	1	1	1	1	1	1
ABAT	1	1	1	1	1	1	1
ABCA1	1	1	1	1	1	1	1
ABCA10	1	1	1	1	1	1	1
ABCA12	1	1	1	1	1	1	1
ABCA13	1	1	1	1	1	1	1
ABCA2	1	1	1	1	1	1	1
ABCA3	1	1	1	1	1	1	1
ABCA4	1	1	1	1	1	1	1
ABCA5	1	1	1	1	1	1	1
ABCA6	1	1	1	1	1	1	1
ABCA7	1	1	1	1	1	1	1
ABCA8	1	1	1	1	1	1	1
ABCA9	1	1	1	1	1	1	1
ABCA9.AS1	1	1	1	1	1	1	1
ABCB1	1	1	1	1	1	1	1
ABCB10	1	1	1	1	1	1	204.425
ABCB4	1	1	1	1	1	1	1
ABCB5	1	1	1	1	1	1	1
ABCB6	1	1	1	1	1	1	1
ABCB7	38.4234	31.4887	1	1	1	1	27.5447
ABCB8	1	1	1	1	1	1	19.2207
ABCB9	1	1	1	1	1	1	1
ABCC1	1	1	1	1	1	1	1
ABCC10	1	1	1	1	1	1	1
ABCC11	1	1	1	1	1	1	1
ABCC2	1	1	1	1	1	1	1
ABCC3	1	1	1	1	1	1	1
ABCC4	1	1	1	1	1	1	1
ABCC5	1	1	1	1	1	1	28.8989
ABCC6	1	1	1	1	1	1	1
ABCC8	1	1	1	1	1	1	1
ABCC9	1	1	1	1	1	1	1
ABCD1	1	1	1	1	1	1	1
ABCD2	1	1	1	1	1	1	1
ABCD3	1	1	1	1	1	1	1
ABCD4	75.5821	44.4572	1	1	1	1	1
ABCE1	63.111	81.3829	63.4547	70.1709	1	42.9802	45.4265
ABCF1	89.0696	58.7139	113.462	79.84	55.2243	61.7387	54.5132
ABCF2	1	1	1	1	1	1	1
ABCF2.1	1	1	1	1	1	1	1
ABCF3	1	1	1	1	1	1	1
ABCG1	1	1	1	1	1	1	1
ABCG2	1	1	1	1	1	1	21.6254
ABCG8	1	1	1	1	1	1	1
ABHD1	1	1	1	1	1	1	1
ABHD10	1	1	1	1	1	1	1
ABHD11	1	1	1	1	1	1	1
ABHD12	1	1	1	1	1	30.1649	18.878
ABHD12B	1	1	1	1	1	1	1
ABHD13	1	1	1	1	1	1	1
ABHD14A	1	37.2157	49.0718	35.9104	1	1	1
ABHD14A.ACY1	1	1	1	1	1	1	1
ABHD14B	59.5788	98.0841	57.1981	57.9677	1	48.8624	1
ABHD15	1	1	1	1	1	1	1
ABHD15.AS1	1	1	1	1	1	1	1
ABHD16A	1	1	1	1	1	1	1
ABHD16B	1	1	1	1	1	1	1
ABHD17A	1	37.6368	215.501	56.1984	42.4089	42.4634	1
ABHD17B	146.292	32.4499	1	1	1	1	1
ABHD17C	1	1	1	1	1	1	1
ABHD18	1	1	1	1	1	1	1
ABHD2	1	1	1	1	38.5536	1	25.8099
ABHD3	178.448	1	47.6557	1	1	1	1
ABHD4	1	1	1	1	1	1	1
ABHD5	1	1	1	1	52.657	1	153.011
ABHD6	1	1	1	1	1	1	1
ABHD8	1	1	1	1	1	1	1
ABI1	97.6323	60.0432	79.399	55.0641	55.0726	43.8722	17.5308
ABI2	1	45.2038	1	1	1	1	1
ABI3	1	1	127.268	1	1	75.9285	1
ABI3BP	1	1	1	1	1	1	1
ABL1	1	1	1	1	1	1	1
ABL2	1	1	1	1	1	1	1
ABLIM1	1	1	50.9015	89.6747	1	1	1
ABLIM2	1	1	1	1	1	1	1
ABLIM3	1	1	1	1	1	1	1
ABO	1	1	1	1	1	1	1
ABR	1	1	1	1	1	1	1
ABRACL	275.461	159.326	186.522	163.269	152.709	169.333	1
ABRAXAS1	1	66.6372	1	1	1	1	1
ABRAXAS2	1	1	1	1	1	1	1
ABT1	41.4848	43.9462	71.2742	43.0695	1	35.6253	1
ABTB1	38.4716	1	52.4528	44.5257	42.3758	1	1
ABTB2	1	1	1	1	1	1	1
AC000003.2	1	1	1	1	1	1	1
AC000032.1	1	1	1	1	1	1	1
AC000036.4	1	1	1	1	1	1	1
AC000068.1	1	1	1	1	1	1	1
AC000068.10	1	1	1	1	1	1	1
AC000068.2	1	1	1	1	1	1	1
AC000068.3	1	1	1	1	1	1	1
AC000068.5	1	1	1	1	1	1	1
AC000068.9	1	1	1	1	1	1	1
AC000093.1	1	1	1	1	1	1	1
AC000403.1	1	1	1	1	1	1	1
AC001226.1	1	1	1	1	1	1	1
AC001226.2	1	1	1	1	1	1	1
AC002070.1	1	1	1	1	1	1	1
AC002074.1	1	1	1	1	1	1	1
AC002091.1	1	1	1	1	1	1	1
AC002091.2	1	1	1	1	1	1	1
AC002094.2	1	1	1	1	1	1	1
AC002115.1	1	1	1	1	1	1	1
AC002116.2	1	1	1	1	1	1	1
AC002116.7	1	1	1	1	1	1	1
AC002117.1	1	1	1	1	1	1	1
AC002128.2	1	1	1	1	1	1	1
AC002306.1	1	1	1	1	1	1	1
AC002310.1	1	1	1	1	1	1	1
AC002310.12	1	1	1	1	1	1	1
AC002310.2	1	1	1	1	1	1	1
AC002310.7	1	1	1	1	1	1	1
AC002347.1	1	1	1	1	1	1	1
AC002375.1	1	1	1	1	1	1	1
AC002383.1	1	1	1	1	1	1	1
AC002384.1	1	1	1	1	1	1	1
AC002398.1	1	1	1	1	1	1	1
AC002398.11	1	1	1	1	1	1	1
AC002398.5	1	1	1	1	1	1	1
AC002401.1	1	1	1	1	1	1	1
AC002401.4	1	1	1	1	1	1	1
AC002429.2	1	1	1	1	1	1	1
AC002429.5	1	1	1	1	1	1	1
AC002451.1	1	1	1	1	1	1	1
AC002451.3	1	1	1	1	1	1	1
AC002454.1	68.8335	74.7032	1	1	1	1	1
AC002456.1	1	1	1	1	1	1	1
AC002456.2	1	1	1	1	1	1	1
AC002464.1	1	1	1	1	1	1	1
AC002467.1	1	1	1	1	1	1	1
AC002467.7	1	1	1	1	1	1	1
AC002470.1	1	1	1	1	1	1	1
AC002472.13	1	1	1	1	1	1	1
AC002480.3	1	1	1	1	1	1	1
AC002480.4	1	1	1	1	1	1	1
AC002550.1	1	1	1	1	1	1	1
AC002550.2	1	1	1	1	1	1	1
AC002550.5	1	1	1	1	1	1	1
AC002553.1	1	1	1	1	1	1	1
AC002553.2	1	1	1	1	1	1	1
AC002558.2	1	1	1	1	1	1	1
AC003002.3	1	1	1	1	1	1	1
AC003005.2	1	1	1	1	1	1	1
AC003035.1	1	1	1	1	1	1	1
AC003043.2	1	1	1	1	1	1	1
AC003051.1	1	1	1	1	1	1	1
AC003075.4	1	1	1	1	1	1	1
AC003090.1	1	1	1	1	1	1	1
AC003092.1	1	1	1	1	1	1	1
AC003101.1	1	1	1	1	1	1	1
AC003101.2	1	1	1	1	1	1	1
AC003102.1	1	1	1	1	1	1	1
AC003102.3	1	1	1	1	1	1	1
AC003665.1	1	1	1	1	1	1	1
AC003681.1	1	1	1	1	1	1	1
AC003682.1	1	1	1	1	1	1	1
AC003956.1	1	1	1	1	1	1	1
AC003965.1	1	1	1	1	1	1	1
AC003991.1	1	1	1	1	1	1	1
AC003991.2	1	1	1	1	1	1	1
AC004017.1	1	1	1	1	1	1	1
AC004034.1	1	1	1	1	1	1	1
AC004039.1	1	1	1	1	1	1	1
AC004067.1	1	1	1	1	1	1	1
AC004067.5	1	1	1	1	1	1	1
AC004069.1	1	1	1	1	1	1	1
AC004069.2	1	1	1	1	1	1	1
AC004076.1	1	1	1	1	1	1	1
AC004076.2	1	1	1	1	1	1	1
AC004076.9	1	1	1	1	1	1	1
AC004130.1	1	1	1	1	1	1	1
AC004148.2	1	1	1	1	1	1	1
AC004156.1	1	1	1	1	1	1	1
AC004156.3	1	1	1	1	1	1	1
AC004158.1	1	1	1	1	1	1	1
AC004158.2	1	1	1	1	1	1	1
AC004223.2	1	1	1	1	1	1	1
AC004223.4	1	1	1	1	1	1	1
AC004232.2	1	1	1	1	1	1	1
AC004233.3	1	1	1	1	1	1	1
AC004233.4	1	1	1	1	1	1	1
AC004241.1	1	1	1	1	1	1	1
AC004241.2	1	1	1	1	1	1	1
AC004253.1	1	1	1	1	1	1	1
AC004257.1	1	1	1	1	1	1	1
AC004257.3	1	1	1	1	1	1	1
AC004263.1	1	1	1	1	1	1	1
AC004264.1	1	1	1	1	1	1	1
AC004381.1	1	1	1	1	1	1	1
AC004381.6	1	1	1	1	1	1	1
AC004408.1	1	1	1	1	1	1	1
AC004447.2	1	1	1	1	1	1	1
AC004463.6	1	1	1	1	1	1	1
AC004466.1	1	1	1	1	1	1	1
AC004470.1	1	1	1	1	1	1	1
AC004477.3	1	1	1	1	1	1	1
AC004485.3	1	1	1	1	1	1	1
AC004490.1	1	1	1	1	1	1	1
AC004492.1	1	1	1	1	1	1	1
AC004494.1	1	1	1	1	1	1	1
AC004510.3	1	1	1	1	1	1	1
AC004520.1	1	1	1	1	1	1	1
AC004528.1	1	1	1	1	1	1	1
AC004528.2	1	1	1	1	1	1	1
AC004528.4	1	1	1	1	1	1	1
AC004540.1	1	1	1	1	1	1	1
AC004540.2	1	1	1	1	1	1	1
AC004540.4	1	1	1	1	1	1	1
AC004540.5	1	1	1	1	1	1	1
AC004542.2	1	1	1	1	1	1	1
AC004556.1	1	1	1	1	70.2337	95.9175	27.5729
AC004584.1	1	1	1	1	1	1	1
AC004585.1	1	1	1	1	1	1	1
AC004593.3	1	1	1	1	1	1	1
AC004687.1	152.482	106.41	188.312	78.1757	148.72	160.341	43.4884
AC004704.1	1	1	1	1	1	1	1
AC004706.1	1	1	1	1	1	1	1
AC004754.1	1	1	1	1	1	1	1
AC004771.1	1	1	1	1	1	1	1
AC004771.2	1	1	1	1	1	1	1
AC004771.3	1	1	1	1	1	1	1
AC004771.4	1	1	1	1	1	1	1
AC004771.5	1	1	1	1	1	1	1
AC004775.1	1	1	1	1	1	1	1
AC004801.6	1	1	1	1	1	1	1
AC004803.1	1	1	1	1	1	1	1
AC004812.2	1	1	1	1	1	1	1
AC004816.1	1	1	1	1	1	1	1
AC004816.2	1	1	1	1	1	1	1
AC004817.3	1	1	1	1	1	1	1
AC004824.2	1	1	1	1	1	1	1
AC004825.2	1	1	1	1	1	1	1
AC004832.1	1	1	1	1	1	1	1
AC004832.3	1	1	1	1	1	1	1
AC004832.6	1	1	1	1	1	1	1
AC004834.1	1	1	1	1	1	1	1
AC004837.2	1	1	1	1	1	1	1
AC004839.1	1	1	1	1	1	1	1
AC004840.9	1	1	1	1	1	1	1
AC004846.1	1	1	1	1	1	1	1
AC004846.2	1	1	1	1	1	1	1
AC004852.2	1	1	1	1	1	1	1
AC004854.2	1	1	1	1	1	1	1
AC004854.4	1	1	1	1	1	1	1
AC004865.2	1	1	1	1	1	1	1
AC004877.1	1	1	1	1	1	1	1
AC004878.2	1	1	1	1	1	1	1
AC004878.8	1	1	1	1	1	1	1
AC004884.2	1	1	1	1	1	1	1
AC004889.1	1	1	1	1	1	1	1
AC004893.11	1	1	1	1	1	1	1
AC004895.1	1	1	1	1	1	1	1
AC004895.4	1	1	1	1	1	1	1
AC004908.1	1	1	1	1	1	1	1
AC004908.3	1	1	1	1	1	1	1
AC004918.1	1	1	1	1	1	1	1
AC004921.1	1	1	1	1	1	1	1
AC004922.1	1	1	1	1	1	1	1
AC004923.4	1	1	1	1	1	1	1
AC004941.1	1	1	1	1	1	1	1
AC004941.3	1	1	1	1	1	1	1
AC004943.1	1	1	1	1	1	1	1
AC004943.2	1	1	1	1	1	1	1
AC004943.3	1	1	1	1	1	1	1
AC004947.1	1	1	1	1	1	1	1
AC004948.1	1	1	1	1	1	1	1
AC004951.1	1	1	1	1	1	1	1
AC004951.6	1	1	1	1	1	1	1
AC004969.1	1	1	1	1	1	1	1
AC004982.1	1	1	1	1	1	1	1
AC004982.2	1	1	1	1	1	1	1
AC004990.1	1	1	1	1	1	1	1
AC005003.1	1	1	1	1	1	1	1
AC005005.3	1	1	1	1	1	1	1
AC005014.2	1	1	1	1	1	1	1
AC005034.3	1	1	1	1	1	1	1
AC005034.4	1	1	1	1	1	1	1
AC005037.1	1	1	1	1	1	1	1
AC005037.3	1	1	1	1	1	1	1
AC005041.1	1	1	1	1	1	1	1
AC005046.1	1	1	1	1	1	1	1
AC005070.3	1	1	1	1	1	1	1
AC005076.1	1	1	1	1	1	1	1
AC005076.5	1	1	1	1	1	1	1
AC005082.1	1	1	1	1	1	1	1
AC005082.12	1	1	1	1	1	1	1
AC005086.1	1	1	1	1	1	1	1
AC005091.1	1	1	1	1	1	1	1
AC005096.1	1	1	1	1	1	1	1
AC005154.4	1	1	1	1	1	1	1
AC005154.6	1	1	1	1	1	1	1
AC005162.3	1	1	1	1	1	1	1
AC005165.1	1	1	1	1	1	1	1
AC005197.1	1	1	1	1	1	1	1
AC005220.1	1	1	1	1	1	1	1
AC005220.3	1	1	1	1	1	1	1
AC005224.1	1	1	1	1	1	1	1
AC005224.2	1	1	1	1	1	1	1
AC005224.3	1	1	1	1	1	1	1
AC005224.4	1	1	1	1	1	1	1
AC005225.2	1	1	1	1	1	1	1
AC005225.3	1	1	1	1	1	1	1
AC005229.4	1	1	1	1	1	1	1
AC005244.2	1	1	1	1	1	1	1
AC005253.1	1	1	1	1	1	1	1
AC005253.2	1	1	1	1	1	1	1
AC005253.4	1	1	1	1	1	1	1
AC005258.1	1	1	1	1	1	1	1
AC005261.1	1	1	1	1	1	1	1
AC005261.2	1	1	1	1	1	1	1
AC005261.3	1	1	1	1	1	1	1
AC005264.1	1	1	1	1	1	1	1
AC005264.2	1	1	1	1	1	1	1
AC005277.2	1	1	1	1	1	1	1
AC005280.2	1	1	1	1	1	1	1
AC005288.1	1	1	1	1	1	1	1
AC005304.1	1	1	1	1	1	1	1
AC005304.2	1	1	1	1	1	1	1
AC005304.3	1	1	1	1	1	1	1
AC005306.3	1	1	1	1	1	1	1
AC005307.1	1	1	1	1	1	1	1
AC005324.1	1	1	1	1	1	1	1
AC005324.3	1	1	1	1	1	1	1
AC005324.6	1	1	1	1	1	1	1
AC005329.1	1	1	1	1	1	1	1
AC005329.2	1	1	1	1	1	1	1
AC005329.3	1	1	1	1	1	1	1
AC005329.7	1	1	1	1	1	1	1
AC005332.1	1	1	1	1	1	1	1
AC005332.3	1	1	1	1	1	1	1
AC005332.4	1	1	1	1	1	1	1
AC005332.5	1	1	1	1	1	1	1
AC005332.6	1	1	1	1	1	1	1
AC005332.7	1	1	1	1	1	1	1
AC005332.8	1	1	1	1	1	1	1
AC005339.1	1	1	1	1	1	1	1
AC005339.2	1	1	1	1	1	1	1
AC005342.1	1	1	1	1	1	1	1
AC005342.2	1	1	1	1	1	1	1
AC005355.1	1	1	1	1	1	1	1
AC005356.1	1	1	1	1	1	1	1
AC005358.2	1	1	1	1	1	1	1
AC005363.2	1	1	1	1	1	1	1
AC005392.2	1	1	1	1	1	1	1
AC005393.1	1	1	1	1	1	1	1
AC005394.1	1	1	1	1	1	1	1
AC005410.2	1	1	1	1	1	1	1
AC005476.2	1	1	1	1	1	1	1
AC005479.1	1	1	1	1	1	1	1
AC005479.2	1	1	1	1	1	1	1
AC005480.1	1	1	1	1	1	1	1
AC005481.1	1	1	1	1	1	1	1
AC005481.5	1	1	1	1	1	1	1
AC005498.2	1	1	1	1	1	1	1
AC005498.3	1	1	1	1	1	1	1
AC005520.1	1	1	1	1	1	1	1
AC005520.2	1	1	1	1	1	1	1
AC005520.5	1	1	1	1	1	1	1
AC005523.1	1	1	1	1	1	1	1
AC005523.2	1	1	1	1	1	1	1
AC005523.3	1	1	1	1	1	1	1
AC005534.1	1	1	1	1	1	1	1
AC005534.8	1	1	1	1	1	1	1
AC005537.1	1	1	1	1	1	1	1
AC005540.1	1	1	1	1	1	1	1
AC005540.3	1	1	1	1	1	1	1
AC005580.1	1	1	1	1	1	1	1
AC005586.1	1	1	1	1	1	1	1
AC005592.2	1	1	1	1	1	1	1
AC005594.3	1	1	1	1	1	1	1
AC005606.1	1	1	1	1	1	1	1
AC005606.2	1	1	1	1	1	1	1
AC005614.1	1	1	1	1	1	1	1
AC005614.3	1	1	1	1	1	1	1
AC005616.1	1	1	1	1	1	1	1
AC005616.2	1	1	1	1	1	1	1
AC005618.1	1	1	1	1	1	1	1
AC005618.6	1	1	1	1	1	1	1
AC005624.2	1	1	1	1	1	1	1
AC005670.1	1	1	1	1	1	1	1
AC005670.2	1	1	1	1	1	1	1
AC005674.1	1	1	1	1	1	1	1
AC005682.8	1	1	1	1	1	1	1
AC005695.2	1	1	1	1	1	1	1
AC005695.3	1	1	1	1	1	1	1
AC005696.1	1	1	1	1	1	1	1
AC005696.3	1	1	1	1	1	1	1
AC005696.4	1	1	1	1	1	1	1
AC005697.2	1	1	1	1	1	1	1
AC005699.1	1	1	1	1	1	1	1
AC005726.1	1	1	1	1	1	1	1
AC005726.4	1	1	1	1	1	1	1
AC005726.5	1	1	1	1	1	1	1
AC005730.2	1	1	1	1	1	1	1
AC005740.4	1	1	1	1	1	1	1
AC005740.6	1	1	1	1	1	1	1
AC005757.1	1	1	1	1	1	1	1
AC005757.6	1	1	1	1	1	1	1
AC005759.1	1	1	1	1	1	1	1
AC005775.1	1	1	1	1	1	1	1
AC005775.2	1	1	1	1	1	1	1
AC005776.2	1	1	1	1	1	1	1
AC005779.1	1	1	1	1	1	1	1
AC005780.1	1	1	1	1	1	1	1
AC005786.2	1	1	1	1	1	1	1
AC005786.3	1	1	1	1	1	1	1
AC005786.5	1	1	1	1	1	1	1
AC005789.11	1	1	1	1	1	1	1
AC005790.1	1	1	1	1	1	1	1
AC005808.1	1	1	1	1	1	1	1
AC005833.3	1	1	1	1	1	1	1
AC005837.1	1	1	1	1	1	1	1
AC005837.2	1	1	1	1	1	1	1
AC005838.2	1	1	1	1	1	1	1
AC005840.2	1	1	1	1	1	1	1
AC005840.4	1	1	1	1	1	1	1
AC005841.1	1	1	1	1	1	1	1
AC005842.1	1	1	1	1	1	1	1
AC005871.2	1	1	1	1	1	1	1
AC005899.1	1	1	1	1	1	1	1
AC005899.5	1	1	1	1	1	1	1
AC005899.6	1	1	1	1	1	1	1
AC005899.7	1	1	1	1	1	1	1
AC005899.8	1	1	1	1	1	1	1
AC005920.1	1	1	1	1	1	1	1
AC005920.2	1	1	1	1	1	1	1
AC005920.3	1	1	1	1	1	1	1
AC005920.4	1	1	1	1	1	1	1
AC005921.2	1	1	1	1	1	1	1
AC005943.5	1	1	1	1	1	1	1
AC005944.1	1	1	1	1	1	1	1
AC005944.2	1	1	1	1	1	1	1
AC005954.2	1	1	1	1	1	1	1
AC005954.4	1	1	1	1	1	1	1
AC005962.1	1	1	1	1	1	1	1
AC005972.1	1	1	1	1	1	1	1
AC006012.1	1	1	1	1	1	1	1
AC006017.1	1	1	1	1	1	1	1
AC006027.1	1	1	1	1	1	1	1
AC006030.1	1	1	1	1	1	1	1
AC006033.2	1	1	1	1	1	1	1
AC006042.1	1	1	1	1	1	1	1
AC006042.2	1	1	1	1	1	1	1
AC006042.4	1	1	1	1	1	1	1
AC006058.1	1	1	1	1	1	1	1
AC006059.1	1	1	1	1	1	1	1
AC006064.1	1	1	1	1	1	1	1
AC006064.2	1	1	1	1	1	1	1
AC006064.3	1	1	1	1	1	1	1
AC006064.4	1	1	1	1	1	1	1
AC006111.3	1	1	1	1	1	1	1
AC006115.1	1	1	1	1	1	1	1
AC006115.3	1	1	1	1	1	1	1
AC006116.17	1	1	1	1	1	1	1
AC006116.20	1	1	1	1	1	1	1
AC006116.8	1	1	1	1	1	1	1
AC006116.9	1	1	1	1	1	1	1
AC006126.3	1	1	1	1	1	1	1
AC006129.1	1	1	1	1	1	1	1
AC006129.2	1	1	1	1	1	1	1
AC006129.4	1	1	1	1	1	1	1
AC006146.1	1	1	1	1	1	1	1
AC006157.1	1	1	1	1	1	1	1
AC006160.1	1	1	1	1	1	1	1
AC006160.5	1	1	1	1	1	1	1
AC006207.1	1	1	1	1	1	1	1
AC006213.1	1	1	1	1	1	1	1
AC006213.2	1	1	1	1	1	1	1
AC006213.3	1	1	1	1	1	1	1
AC006238.1	1	1	1	1	1	1	1
AC006252.1	1	1	1	1	1	1	1
AC006254.1	1	1	1	1	1	1	1
AC006273.1	1	1	1	1	1	1	1
AC006277.2	1	1	1	1	1	1	1
AC006299.1	1	1	1	1	1	1	1
AC006305.1	1	1	1	1	1	1	1
AC006305.3	1	1	1	1	1	1	1
AC006329.1	1	1	1	1	1	1	1
AC006333.2	1	1	1	1	1	1	1
AC006369.1	1	1	1	1	1	1	1
AC006369.2	1	1	1	1	1	1	1
AC006372.1	1	1	1	1	1	1	1
AC006372.3	1	1	1	1	1	1	1
AC006372.4	1	1	1	1	1	1	1
AC006372.5	1	1	1	1	1	1	1
AC006435.1	1	1	1	1	1	1	1
AC006435.2	1	1	1	1	1	1	1
AC006441.1	1	1	1	1	1	1	1
AC006441.3	1	1	1	1	1	1	1
AC006449.1	1	1	1	1	1	1	1
AC006449.2	1	1	1	1	1	1	1
AC006449.3	1	1	1	1	1	1	1
AC006449.5	1	1	1	1	1	1	1
AC006449.6	1	1	1	1	1	1	1
AC006460.1	1	1	1	1	1	1	1
AC006480.2	1	1	1	1	1	1	1
AC006483.2	1	1	1	1	1	1	1
AC006486.1	1	1	1	1	1	1	1
AC006504.1	1	1	1	1	1	1	1
AC006504.5	1	1	1	1	1	1	1
AC006511.4	1	1	1	1	1	1	1
AC006518.7	1	1	1	1	1	1	1
AC006547.1	1	1	1	1	1	1	1
AC006547.13	1	1	1	1	1	1	1
AC006547.14	1	1	1	1	1	1	1
AC006547.15	1	1	1	1	1	1	1
AC006547.2	1	1	1	1	1	1	1
AC006547.3	1	1	1	1	1	1	1
AC006547.8	1	1	1	1	1	1	1
AC006942.1	1	1	1	1	1	1	1
AC006942.4	1	1	1	1	1	1	1
AC006946.16	1	1	1	1	1	1	1
AC006946.17	1	1	1	1	1	1	1
AC006946.2	1	1	1	1	1	1	1
AC006946.3	1	1	1	1	1	1	1
AC006960.3	1	1	1	1	1	1	1
AC006994.2	1	1	1	1	1	1	1
AC007009.1	1	1	1	1	1	1	1
AC007014.1	1	1	1	1	1	1	1
AC007029.1	1	1	1	1	1	1	1
AC007032.1	1	1	1	1	1	1	1
AC007036.1	1	1	1	1	1	1	1
AC007036.6	1	1	1	1	1	1	1
AC007038.1	1	1	1	1	1	1	1
AC007038.2	1	1	1	1	1	1	1
AC007038.7	1	1	1	1	1	1	1
AC007040.11	1	1	1	1	1	1	1
AC007040.2	1	1	1	1	1	1	1
AC007050.17	1	1	1	1	1	1	1
AC007064.2	1	1	1	1	1	1	1
AC007100.1	1	1	1	1	1	1	1
AC007114.1	1	1	1	1	1	1	1
AC007114.2	1	1	1	1	1	1	1
AC007131.2	1	1	1	1	1	1	1
AC007163.1	1	1	1	1	1	1	1
AC007163.3	1	1	1	1	1	1	1
AC007179.2	1	1	1	1	1	1	1
AC007192.2	1	1	1	1	1	1	1
AC007192.6	1	1	1	1	1	1	1
AC007193.1	1	1	1	1	1	1	1
AC007193.9	1	1	1	1	1	1	1
AC007216.2	1	1	1	1	1	1	1
AC007216.4	1	1	1	1	1	1	1
AC007220.1	1	1	1	1	1	1	1
AC007228.11	1	1	1	1	1	1	1
AC007228.2	1	1	1	1	1	1	1
AC007228.5	1	1	1	1	1	1	1
AC007228.9	1	1	1	1	1	1	1
AC007240.1	1	1	1	1	1	1	1
AC007246.3	1	1	1	1	1	1	1
AC007249.2	1	1	1	1	1	1	1
AC007250.1	1	1	1	1	1	1	1
AC007255.1	1	1	1	1	1	1	1
AC007262.2	1	1	1	1	1	1	1
AC007272.1	1	1	1	1	1	1	1
AC007285.1	1	1	1	1	1	1	1
AC007292.1	1	1	1	1	1	1	1
AC007292.2	1	1	1	1	1	1	1
AC007292.3	1	1	1	1	1	1	1
AC007292.4	1	1	1	1	1	1	1
AC007292.6	1	1	1	1	1	1	1
AC007298.1	1	1	1	1	1	1	1
AC007298.2	1	1	1	1	1	1	1
AC007308.1	1	1	1	1	1	1	1
AC007308.6	1	1	1	1	1	1	1
AC007319.1	1	1	1	1	1	1	1
AC007325.2	1	1	1	1	1	1	1
AC007325.4	1	1	1	1	1	1	1
AC007326.2	1	1	1	1	1	1	1
AC007326.4	1	1	1	1	1	1	1
AC007336.1	1	1	1	1	1	1	1
AC007342.4	1	1	1	1	1	1	1
AC007342.5	1	1	1	1	1	1	1
AC007349.2	1	1	1	1	1	1	1
AC007349.3	1	1	1	1	1	1	1
AC007349.4	1	1	1	1	1	1	1
AC007349.5	1	1	1	1	1	1	1
AC007364.1	1	1	1	1	1	1	1
AC007365.1	1	1	1	1	1	1	1
AC007365.3	1	1	1	1	1	1	1
AC007370.1	1	1	1	1	1	1	1
AC007370.2	1	1	1	1	1	1	1
AC007378.1	1	1	1	1	1	1	1
AC007381.1	1	1	1	1	1	1	1
AC007381.2	1	1	1	1	1	1	1
AC007381.3	1	1	1	1	1	1	1
AC007382.1	1	1	1	1	1	1	1
AC007383.2	1	1	1	1	1	1	1
AC007383.3	1	1	1	1	1	1	1
AC007383.4	1	1	1	1	1	1	1
AC007384.1	1	1	1	1	1	1	1
AC007386.2	1	1	1	1	1	1	1
AC007388.1	1	1	1	1	1	1	1
AC007389.3	1	1	1	1	1	1	1
AC007391.1	1	1	1	1	1	1	1
AC007405.1	1	1	1	1	1	1	1
AC007405.2	1	1	1	1	1	1	1
AC007405.3	1	1	1	1	1	1	1
AC007405.4	1	1	1	1	1	1	1
AC007405.6	1	1	1	1	1	1	1
AC007406.3	1	1	1	1	1	1	1
AC007422.2	1	1	1	1	1	1	1
AC007431.1	1	1	1	1	1	1	1
AC007431.2	1	1	1	1	1	1	1
AC007448.3	1	1	1	1	1	1	1
AC007463.1	1	1	1	1	1	1	1
AC007463.2	1	1	1	1	1	1	1
AC007493.2	1	1	1	1	1	1	1
AC007494.2	1	1	1	1	1	1	1
AC007495.1	1	1	1	1	1	1	1
AC007496.2	1	1	1	1	1	1	1
AC007529.2	1	1	1	1	1	1	1
AC007533.1	1	1	1	1	1	1	1
AC007541.1	1	1	1	1	1	1	1
AC007551.3	1	1	1	1	1	1	1
AC007566.1	1	1	1	1	1	1	1
AC007569.1	1	1	1	1	1	1	1
AC007570.1	1	1	1	1	1	1	1
AC007601.1	1	1	1	1	1	1	1
AC007603.1	1	1	1	1	1	1	1
AC007608.1	1	1	1	1	1	1	1
AC007608.3	1	1	1	1	1	1	1
AC007610.1	1	1	1	1	1	1	1
AC007611.1	1	1	1	1	1	1	1
AC007613.1	1	1	1	1	1	1	1
AC007614.1	1	1	1	1	1	1	1
AC007619.1	1	1	1	1	1	1	1
AC007620.2	1	1	1	1	1	1	1
AC007620.3	1	1	1	1	1	1	1
AC007622.2	1	1	1	1	1	1	1
AC007638.1	1	1	1	1	1	1	1
AC007638.2	1	1	1	1	1	1	1
AC007655.1	1	1	1	1	1	1	1
AC007663.2	1	1	1	1	1	1	1
AC007663.3	1	1	1	1	1	1	1
AC007666.1	1	1	1	1	1	1	1
AC007681.1	1	1	1	1	1	1	1
AC007686.2	1	1	1	1	1	1	1
AC007686.3	1	1	1	1	1	1	1
AC007687.1	1	1	1	1	1	1	1
AC007728.1	1	1	1	1	1	1	1
AC007728.2	1	1	1	1	1	1	1
AC007731.3	1	1	1	1	1	1	1
AC007731.4	1	1	1	1	1	1	1
AC007743.1	1	1	1	1	1	1	1
AC007773.1	1	1	1	1	1	1	1
AC007773.2	1	1	1	1	1	1	1
AC007785.3	1	1	1	1	1	1	1
AC007786.1	1	1	1	1	1	1	1
AC007823.1	1	1	1	1	1	1	1
AC007878.1	1	1	1	1	1	1	1
AC007879.2	1	1	1	1	1	1	1
AC007879.3	1	1	1	1	1	1	1
AC007880.1	1	1	1	1	1	1	1
AC007881.2	1	1	1	1	1	1	1
AC007881.3	1	1	1	1	1	1	1
AC007906.2	1	1	1	1	1	1	1
AC007938.1	1	1	1	1	1	1	1
AC007938.2	1	1	1	1	1	1	1
AC007938.3	1	1	1	1	1	1	1
AC007950.2	1	1	1	1	1	1	1
AC007952.4	59.8212	39.5235	81.4972	1	202.457	76.2696	64.2268
AC007952.5	1	1	1	1	1	1	1
AC007952.6	1	1	1	1	1	1	1
AC007952.7	1	1	1	1	1	1	1
AC007993.3	1	1	1	1	1	1	1
AC007998.2	1	1	1	1	1	1	1
AC007998.3	1	1	1	1	1	1	1
AC007998.4	1	1	1	1	1	1	1
AC008011.2	1	1	1	1	1	1	1
AC008014.1	1	1	1	1	1	1	1
AC008033.3	1	1	1	1	1	1	1
AC008035.1	1	1	1	1	1	1	1
AC008040.1	1	1	1	1	1	1	1
AC008040.5	1	1	1	1	1	1	1
AC008056.1	1	1	1	1	1	1	1
AC008060.1	60.5964	1	1	1	1	1	1
AC008060.7	1	1	1	1	1	1	1
AC008073.1	1	1	1	1	1	1	1
AC008074.1	1	1	1	1	1	1	1
AC008074.3	1	1	1	1	1	1	1
AC008079.2	1	1	1	1	1	1	1
AC008083.1	1	1	1	1	1	1	1
AC008083.2	1	1	1	1	1	1	1
AC008083.3	1	1	1	1	1	1	1
AC008088.4	1	1	1	1	1	1	1
AC008105.1	1	1	1	1	1	1	1
AC008105.3	1	1	1	1	1	1	1
AC008115.1	1	1	1	1	1	1	1
AC008115.4	1	1	1	1	1	1	1
AC008121.2	1	1	1	1	1	1	1
AC008121.3	1	1	1	1	1	1	1
AC008124.1	50.7092	63.7454	1	1	1	1	1
AC008149.1	1	1	1	1	1	1	1
AC008174.3	1	1	1	1	1	1	1
AC008264.2	1	1	1	1	1	1	1
AC008267.1	1	1	1	1	1	1	1
AC008267.5	1	1	1	1	1	1	1
AC008269.1	1	1	1	1	1	1	1
AC008277.1	1	1	1	1	1	1	1
AC008280.3	1	1	1	1	1	1	1
AC008378.1	1	1	1	1	1	1	1
AC008392.1	1	1	1	1	1	1	1
AC008393.1	1	1	1	1	1	1	1
AC008394.1	1	1	1	1	1	1	1
AC008397.1	1	1	1	1	1	1	1
AC008403.3	1	1	1	1	1	1	1
AC008415.1	1	1	1	1	1	1	1
AC008429.1	1	1	1	1	1	1	1
AC008429.3	1	1	1	1	1	1	1
AC008434.1	1	1	1	1	1	1	1
AC008438.1	1	1	1	1	1	1	1
AC008440.1	1	1	1	1	1	1	1
AC008440.2	1	1	1	1	1	1	1
AC008440.5	1	1	1	1	1	1	1
AC008443.1	1	1	1	1	1	1	1
AC008443.3	1	1	1	1	1	1	1
AC008443.5	1	1	1	1	1	1	1
AC008443.6	1	1	1	1	1	1	1
AC008467.1	1	1	1	1	1	1	1
AC008494.3	1	1	1	1	1	1	1
AC008522.1	1	1	1	1	1	1	1
AC008537.2	1	1	1	1	1	1	1
AC008537.4	1	1	1	1	1	1	1
AC008543.1	1	1	1	1	1	1	1
AC008543.5	1	1	1	1	1	1	1
AC008549.2	1	1	1	1	1	1	1
AC008551.1	1	1	1	1	1	1	1
AC008555.1	1	1	1	1	1	1	1
AC008555.2	1	1	1	1	1	1	1
AC008555.5	1	1	1	40.353	1	1	1
AC008556.1	1	1	1	1	1	1	1
AC008568.1	1	1	1	1	1	1	1
AC008569.1	1	1	1	1	1	1	1
AC008608.2	1	1	1	1	1	1	1
AC008609.1	1	1	1	1	1	1	1
AC008610.1	1	1	1	1	1	1	1
AC008622.2	1	1	1	1	1	1	1
AC008629.1	1	1	1	1	1	1	1
AC008637.1	1	1	1	1	1	1	1
AC008641.1	1	1	1	1	1	1	1
AC008649.2	1	1	1	1	1	1	1
AC008655.2	1	1	1	1	1	1	1
AC008662.1	1	1	1	1	1	1	1
AC008667.1	1	1	1	1	1	1	1
AC008676.1	1	1	1	1	1	1	1
AC008686.1	1	1	1	1	1	1	1
AC008691.1	1	1	1	1	1	1	1
AC008731.1	1	1	1	1	1	1	1
AC008735.2	1	1	1	1	1	1	1
AC008735.3	1	1	1	1	1	1	1
AC008735.4	1	1	1	1	1	1	1
AC008736.1	1	1	1	1	1	1	1
AC008738.2	1	1	1	1	1	1	1
AC008738.3	1	1	1	1	1	1	1
AC008741.2	1	1	1	1	1	1	1
AC008746.12	1	1	1	1	1	1	1
AC008747.1	1	1	1	1	1	1	1
AC008750.2	1	1	1	1	1	1	1
AC008750.4	1	1	1	1	1	1	1
AC008750.7	1	1	1	1	1	1	1
AC008750.8	1	1	1	1	1	1	1
AC008752.1	1	1	1	1	1	1	1
AC008752.2	1	1	1	1	1	1	1
AC008753.2	1	1	1	1	1	1	1
AC008753.3	1	1	1	1	1	1	1
AC008753.6	1	1	1	1	1	1	1
AC008758.2	1	1	1	1	1	1	1
AC008758.4	1	1	1	1	1	1	1
AC008758.6	1	1	1	1	1	1	1
AC008759.2	1	1	1	1	1	1	1
AC008759.3	1	1	1	1	1	1	1
AC008760.1	1	1	1	1	1	1	1
AC008763.1	1	1	1	1	1	1	1
AC008763.2	1	1	1	1	1	1	1
AC008763.3	1	1	1	1	1	1	1
AC008764.2	1	1	1	1	1	1	1
AC008764.3	1	1	1	1	1	1	1
AC008764.6	1	1	1	1	1	1	1
AC008764.8	1	1	1	1	1	1	1
AC008770.1	1	1	1	1	1	1	1
AC008770.2	1	1	1	1	1	1	1
AC008771.1	1	1	1	1	1	1	1
AC008781.1	1	1	1	1	1	1	1
AC008781.2	1	1	1	1	1	1	1
AC008840.1	1	1	1	1	1	1	1
AC008875.1	1	1	1	1	1	1	1
AC008878.3	1	1	1	1	1	1	1
AC008892.1	1	1	1	1	1	1	1
AC008894.2	1	1	1	1	1	1	1
AC008897.2	1	1	1	1	1	1	1
AC008897.3	1	1	1	1	1	1	1
AC008906.1	1	1	1	1	1	1	1
AC008906.2	1	1	1	1	1	1	1
AC008914.1	1	1	1	1	1	1	1
AC008915.2	1	1	1	1	1	1	1
AC008937.2	1	1	1	1	1	1	1
AC008937.3	1	1	1	1	1	1	1
AC008945.1	1	1	1	1	1	1	1
AC008946.1	1	1	1	1	1	1	1
AC008957.1	1	1	1	1	1	1	1
AC008964.1	1	1	1	1	1	1	1
AC008966.1	1	1	1	1	1	1	1
AC008966.2	1	1	1	1	1	1	1
AC008972.1	1	1	1	1	1	1	1
AC008972.2	1	1	1	1	1	1	1
AC009005.1	1	1	1	1	1	1	1
AC009005.2	1	1	1	1	1	1	1
AC009021.1	1	1	1	1	1	1	1
AC009021.2	1	1	1	1	1	1	1
AC009034.1	1	1	1	1	1	1	1
AC009041.1	1	1	1	1	1	1	1
AC009041.2	1	1	1	1	1	1	1
AC009053.2	1	1	1	1	1	1	1
AC009060.1	1	1	1	1	1	1	1
AC009061.2	1	1	1	1	1	1	1
AC009063.2	1	1	1	1	1	1	1
AC009065.1	1	1	1	1	1	1	1
AC009065.3	1	1	1	1	1	1	1
AC009065.4	1	1	1	1	1	1	1
AC009065.7	1	1	1	1	1	1	1
AC009065.8	1	1	1	1	1	1	1
AC009075.1	1	1	1	1	1	1	1
AC009088.1	1	1	1	1	1	1	1
AC009088.2	1	1	1	1	1	1	1
AC009090.2	1	1	1	1	1	1	1
AC009090.3	1	1	1	1	1	1	1
AC009093.1	1	1	1	1	1	1	1
AC009093.2	1	1	1	1	1	1	1
AC009093.4	1	1	1	1	1	1	1
AC009093.5	1	1	1	1	1	1	1
AC009093.6	1	1	1	1	1	1	1
AC009095.1	1	1	1	1	1	1	1
AC009095.4	1	1	1	1	1	1	1
AC009097.3	1	1	1	1	1	1	1
AC009107.2	1	1	1	1	1	1	1
AC009108.3	1	1	1	1	1	1	1
AC009113.1	1	1	1	1	1	1	1
AC009118.2	1	1	1	1	1	1	1
AC009118.3	1	1	1	1	1	1	1
AC009119.1	1	1	1	1	1	1	1
AC009119.2	1	1	1	1	1	1	1
AC009120.10	1	1	1	1	1	1	1
AC009120.3	1	1	1	1	1	1	1
AC009120.4	1	1	1	1	1	1	1
AC009120.5	1	1	1	1	1	1	1
AC009120.6	1	1	1	1	1	1	1
AC009121.1	1	1	1	1	1	1	1
AC009121.2	1	1	1	1	1	1	1
AC009123.1	1	1	1	1	1	1	1
AC009126.1	1	1	1	1	1	1	1
AC009133.1	1	1	1	1	1	1	1
AC009133.12	1	1	1	1	1	1	1
AC009133.14	1	1	1	1	1	1	1
AC009133.17	1	1	1	1	1	1	1
AC009133.2	1	1	1	1	1	1	1
AC009133.3	1	1	1	1	1	1	1
AC009133.4	1	1	1	1	1	1	1
AC009148.1	1	1	1	1	1	1	1
AC009154.1	1	1	1	1	1	1	1
AC009154.2	1	1	1	1	1	1	1
AC009159.1	1	1	1	1	1	1	1
AC009159.3	1	1	1	1	1	1	1
AC009163.4	1	1	1	1	1	1	1
AC009163.7	1	1	1	1	1	1	1
AC009171.2	1	1	1	1	1	1	1
AC009185.1	1	1	1	1	1	1	1
AC009226.1	1	1	1	1	1	1	1
AC009228.1	1	1	1	1	1	1	1
AC009237.14	1	1	1	1	1	1	1
AC009237.15	1	1	1	1	1	1	1
AC009242.1	1	1	1	1	1	1	1
AC009264.1	1	1	1	1	1	1	1
AC009269.2	1	1	1	1	1	1	1
AC009271.1	1	1	1	1	1	1	1
AC009275.1	1	1	1	1	1	1	1
AC009276.1	1	1	1	1	1	1	1
AC009276.4	1	1	1	1	1	1	1
AC009283.1	1	1	1	1	1	1	1
AC009292.1	1	1	1	1	1	1	1
AC009299.2	1	1	1	1	1	1	1
AC009299.3	1	1	1	1	1	1	1
AC009303.2	1	1	1	1	1	1	1
AC009309.1	1	1	1	1	1	1	1
AC009318.1	1	1	1	1	1	1	1
AC009318.2	1	1	1	1	1	1	1
AC009318.3	1	1	1	1	1	1	1
AC009318.4	1	1	1	1	1	1	1
AC009365.1	1	1	1	1	1	1	1
AC009403.1	1	1	1	1	1	1	1
AC009403.2	1	1	1	1	1	1	1
AC009404.1	1	1	1	1	1	1	1
AC009404.2	1	1	1	1	1	1	1
AC009414.2	1	1	1	1	1	1	1
AC009473.1	1	1	1	1	1	1	1
AC009480.1	1	1	1	1	1	1	1
AC009495.2	1	1	1	1	1	1	1
AC009495.3	1	1	1	1	1	1	1
AC009499.1	1	1	1	1	1	1	1
AC009501.1	1	1	1	1	1	1	1
AC009501.4	1	1	1	1	1	1	1
AC009502.1	1	1	1	1	1	1	1
AC009505.1	1	1	1	1	1	1	1
AC009506.1	1	1	1	1	1	1	1
AC009509.1	1	1	1	1	1	1	1
AC009509.2	1	1	1	1	1	1	1
AC009509.4	1	1	1	1	1	1	1
AC009511.2	1	1	1	1	1	1	1
AC009542.1	1	1	1	1	1	1	1
AC009542.2	1	1	1	1	1	1	1
AC009549.1	1	1	1	1	1	1	1
AC009560.1	1	1	1	1	1	1	1
AC009570.1	1	1	1	1	1	1	1
AC009630.1	1	1	1	1	1	1	1
AC009630.2	1	1	1	1	1	1	1
AC009630.3	1	1	1	1	1	1	1
AC009652.1	1	1	1	1	1	1	1
AC009652.2	1	1	1	1	1	1	1
AC009654.1	1	1	1	1	1	1	1
AC009686.1	1	1	1	1	1	1	1
AC009686.2	1	1	1	1	1	1	1
AC009690.1	1	1	1	1	1	1	1
AC009690.2	1	1	1	1	1	1	1
AC009779.2	1	1	1	1	1	1	1
AC009779.3	1	1	1	1	1	1	1
AC009802.1	1	1	1	1	1	1	1
AC009812.1	1	1	1	1	1	1	1
AC009812.3	1	1	1	1	1	1	1
AC009812.4	1	1	1	1	1	1	1
AC009831.1	1	1	1	1	1	1	1
AC009902.2	1	1	1	1	1	1	1
AC009902.3	1	1	1	1	1	1	1
AC009908.1	1	1	1	1	1	1	1
AC009948.1	1	1	1	1	1	1	1
AC009948.3	1	1	1	1	1	1	1
AC009948.4	1	1	1	1	1	1	1
AC009948.5	1	1	1	1	1	1	1
AC009950.1	1	1	1	1	1	1	1
AC009950.2	1	1	1	1	1	1	1
AC009951.2	1	1	1	1	1	1	1
AC009955.3	1	1	1	1	1	1	1
AC009961.1	1	1	1	1	1	1	1
AC009961.3	1	1	1	1	1	1	1
AC009962.1	1	1	1	1	1	1	1
AC009974.1	1	1	1	1	1	1	1
AC009975.1	1	1	1	1	1	1	1
AC009975.2	1	1	1	1	1	1	1
AC010082.1	1	1	1	1	1	1	1
AC010082.2	1	1	1	1	1	1	1
AC010084.1	1	1	1	1	1	1	1
AC010096.1	1	1	1	1	1	1	1
AC010127.1	1	1	1	1	1	1	1
AC010127.3	1	1	1	1	1	1	1
AC010132.4	1	1	1	1	1	1	1
AC010136.1	1	1	1	1	1	1	1
AC010163.1	1	1	1	1	1	1	1
AC010168.1	1	1	1	1	1	1	1
AC010173.1	1	1	1	1	1	1	1
AC010175.1	1	1	1	1	1	1	1
AC010186.1	1	1	1	1	1	1	1
AC010198.1	1	1	1	1	1	1	1
AC010201.1	1	1	1	1	1	1	1
AC010201.2	1	1	1	1	1	1	1
AC010203.2	1	1	1	1	1	1	1
AC010205.1	1	1	1	1	1	1	1
AC010226.1	1	1	1	1	1	1	1
AC010226.4	1	1	1	1	1	1	1
AC010235.1	1	1	1	1	1	1	1
AC010240.3	1	1	1	1	1	1	1
AC010245.1	1	1	1	1	1	1	1
AC010245.2	1	1	1	1	1	1	1
AC010247.2	1	1	1	1	1	1	1
AC010255.1	1	1	1	1	1	1	1
AC010260.1	1	1	1	1	1	1	1
AC010266.2	1	1	1	1	1	1	1
AC010271.1	1	1	1	1	1	1	1
AC010271.2	1	1	1	1	1	1	1
AC010273.1	1	1	1	1	1	1	1
AC010275.1	1	1	1	1	1	1	1
AC010280.2	1	1	1	1	1	1	1
AC010300.1	1	1	1	1	1	1	1
AC010319.3	1	1	1	1	1	1	1
AC010319.4	1	1	1	1	1	1	1
AC010320.1	1	1	1	1	1	1	1
AC010320.2	1	1	1	1	1	1	1
AC010320.3	1	1	1	1	1	1	1
AC010320.4	1	1	1	1	1	1	1
AC010325.1	1	1	1	1	1	1	1
AC010325.2	1	1	1	1	1	1	1
AC010327.2	1	1	1	1	1	1	1
AC010327.4	1	1	1	1	1	1	1
AC010329.1	1	1	1	1	1	1	1
AC010331.1	1	1	1	1	1	1	1
AC010333.1	1	1	1	1	1	1	1
AC010335.1	1	1	1	1	1	1	1
AC010336.1	1	1	1	1	1	1	1
AC010336.2	1	1	1	1	1	1	1
AC010336.3	1	1	1	1	1	1	1
AC010336.4	1	1	1	1	1	1	1
AC010359.1	1	1	1	1	1	1	1
AC010401.1	1	1	1	1	1	1	1
AC010401.2	1	1	1	1	1	1	1
AC010422.1	1	1	1	1	1	1	1
AC010422.2	1	1	1	1	1	1	1
AC010422.3	1	1	1	1	1	1	1
AC010422.6	1	1	1	1	1	1	1
AC010441.1	1	1	1	1	1	1	1
AC010487.2	1	1	1	1	1	1	1
AC010491.1	1	1	1	1	1	1	1
AC010501.1	1	1	1	1	1	1	1
AC010503.4	1	1	1	1	1	1	1
AC010504.1	1	1	1	1	1	1	1
AC010519.1	1	1	1	1	1	1	1
AC010524.2	1	1	1	1	1	1	1
AC010525.1	1	1	1	1	1	1	1
AC010525.4	1	1	1	1	1	1	1
AC010525.7	1	1	1	1	1	1	1
AC010531.3	1	1	1	1	1	1	1
AC010531.6	1	1	1	1	1	1	1
AC010531.7	1	1	1	1	1	1	1
AC010536.1	1	1	1	1	1	1	1
AC010536.3	1	1	1	1	1	1	1
AC010538.1	1	1	1	1	1	1	1
AC010542.1	1	1	1	1	1	1	1
AC010542.2	1	1	1	1	1	1	1
AC010542.3	1	1	1	1	1	1	1
AC010542.4	1	1	1	1	1	1	1
AC010542.5	1	1	1	1	1	1	1
AC010547.1	1	1	1	1	1	1	1
AC010609.1	1	1	1	1	1	1	1
AC010616.1	1	1	1	1	1	1	1
AC010618.3	1	1	1	1	1	1	1
AC010624.2	1	1	1	1	1	1	1
AC010624.3	1	1	1	1	1	1	1
AC010632.1	1	1	1	1	1	1	1
AC010636.2	1	1	1	1	1	1	1
AC010642.1	1	1	1	1	1	1	1
AC010642.2	1	1	1	1	1	1	1
AC010643.1	1	1	1	1	1	1	1
AC010654.1	1	1	1	1	1	1	1
AC010680.1	1	1	1	1	1	1	1
AC010680.2	1	1	1	1	1	1	1
AC010680.3	1	1	1	1	1	1	1
AC010680.4	1	1	1	1	1	1	1
AC010680.5	1	1	1	1	1	1	1
AC010719.1	1	1	1	1	1	1	1
AC010729.1	1	1	1	1	1	1	1
AC010733.4	1	1	1	1	1	1	1
AC010735.2	1	1	1	1	1	1	1
AC010737.1	1	1	1	1	1	1	1
AC010745.2	1	1	1	1	1	1	1
AC010745.5	1	1	1	1	1	1	1
AC010746.1	1	1	1	1	1	1	1
AC010754.1	1	1	1	1	1	1	1
AC010761.1	1	1	1	1	1	1	1
AC010761.13	1	1	1	1	1	1	1
AC010761.2	1	1	1	1	1	1	1
AC010761.3	1	1	1	1	1	1	1
AC010761.4	1	1	1	1	1	1	1
AC010761.5	1	1	1	1	1	1	1
AC010761.8	1	1	1	1	1	1	1
AC010768.1	1	1	1	1	1	1	1
AC010768.2	1	1	1	1	1	1	1
AC010809.1	1	1	1	1	1	1	1
AC010809.2	1	1	1	1	1	1	1
AC010809.3	1	1	1	1	1	1	1
AC010834.1	1	1	1	1	1	1	1
AC010834.2	1	1	1	1	1	1	1
AC010834.3	1	1	1	1	1	1	1
AC010864.1	1	1	1	1	1	1	1
AC010883.1	1	1	1	1	1	1	1
AC010883.5	1	1	1	1	1	1	1
AC010884.1	1	1	1	1	1	1	1
AC010889.1	1	1	1	1	1	1	1
AC010894.2	1	1	1	1	1	1	1
AC010894.3	1	1	1	1	1	1	1
AC010894.4	1	1	1	1	1	1	1
AC010894.5	1	1	1	1	1	1	1
AC010904.2	1	1	1	1	1	1	1
AC010907.2	1	1	1	1	1	1	1
AC010931.2	1	1	1	1	1	1	1
AC010969.2	1	1	1	1	1	1	1
AC010973.1	1	1	1	1	1	1	1
AC010973.2	1	1	1	1	1	1	1
AC010976.1	1	1	1	1	1	1	1
AC010976.2	1	1	1	1	1	1	1
AC010978.1	1	1	1	1	1	1	1
AC010980.2	1	1	1	1	1	1	1
AC010982.1	1	1	1	1	1	1	1
AC010983.1	1	1	1	1	1	1	1
AC010997.5	1	1	1	1	1	1	1
AC010998.2	1	1	1	1	1	1	1
AC010999.2	1	1	1	1	1	1	1
AC011043.1	1	1	1	1	1	1	1
AC011092.2	1	1	1	1	1	1	1
AC011139.1	1	69.941	1	1	1	1	1
AC011287.1	1	1	1	1	1	1	1
AC011298.1	1	1	1	1	1	1	1
AC011306.1	1	1	1	1	1	1	1
AC011313.1	1	1	1	1	1	1	1
AC011337.1	1	1	1	1	1	1	1
AC011374.2	1	1	1	1	1	1	1
AC011405.1	1	1	1	1	1	1	1
AC011416.3	1	1	1	1	1	1	1
AC011443.1	1	1	1	1	1	1	1
AC011444.1	1	1	1	1	1	1	1
AC011444.2	1	1	1	1	1	1	1
AC011445.2	1	1	1	1	1	1	1
AC011446.1	1	1	1	1	1	1	1
AC011446.2	1	1	1	1	1	1	1
AC011447.3	1	1	1	1	1	1	1
AC011448.1	1	1	1	1	1	1	1
AC011450.1	1	1	1	1	1	1	1
AC011451.1	1	1	1	1	1	1	1
AC011453.1	1	1	1	1	1	1	1
AC011455.1	1	1	1	1	1	1	1
AC011462.1	1	1	1	1	1	1	1
AC011466.1	1	1	1	1	1	1	1
AC011466.2	1	1	1	1	1	1	1
AC011468.5	1	1	1	1	1	1	1
AC011471.2	1	1	1	1	1	1	1
AC011472.1	1	1	1	1	1	1	1
AC011472.4	1	1	1	1	1	1	1
AC011476.3	1	1	1	1	1	1	1
AC011479.1	1	1	1	1	1	1	1
AC011481.1	1	1	1	1	1	1	1
AC011481.2	1	1	1	1	1	1	1
AC011484.1	1	1	1	1	1	1	1
AC011491.3	1	1	1	1	1	1	1
AC011498.1	1	1	1	1	1	1	1
AC011498.2	1	1	1	1	1	1	1
AC011498.3	1	1	1	1	1	1	1
AC011498.4	1	1	1	1	1	1	1
AC011498.6	1	1	1	1	1	1	1
AC011509.1	1	1	1	1	1	1	1
AC011509.2	1	1	1	1	1	1	1
AC011511.1	1	1	1	1	1	1	1
AC011511.2	1	1	1	1	1	1	1
AC011511.3	1	1	1	1	1	1	1
AC011511.5	1	1	1	1	1	1	1
AC011524.1	1	1	1	1	1	1	1
AC011524.2	1	1	1	1	1	1	1
AC011558.5	1	1	1	1	1	1	1
AC011586.1	1	1	1	1	1	1	1
AC011603.1	1	1	1	1	1	1	1
AC011603.2	1	1	1	1	1	1	1
AC011611.3	1	1	1	1	1	1	1
AC011611.4	1	1	1	1	1	1	1
AC011632.1	1	1	1	1	1	1	1
AC011676.1	1	1	1	1	1	1	1
AC011676.2	1	1	1	1	1	1	1
AC011718.2	1	1	1	1	1	1	1
AC011731.1	1	1	1	1	1	1	1
AC011747.2	1	1	1	1	1	1	1
AC011747.4	1	1	1	1	1	1	1
AC011773.1	1	1	1	1	1	1	1
AC011773.3	1	1	1	1	1	1	1
AC011773.4	1	1	1	1	1	1	1
AC011815.1	1	1	1	1	1	1	1
AC011815.2	1	1	1	1	1	1	1
AC011816.2	1	1	1	1	1	1	1
AC011825.2	1	1	1	1	1	1	1
AC011825.4	1	1	1	1	1	1	1
AC011841.1	1	1	1	1	1	1	1
AC011893.1	1	1	1	1	1	1	1
AC011893.3	1	1	1	1	1	1	1
AC011899.2	1	1	1	1	1	1	1
AC011899.3	1	1	1	1	1	1	1
AC011921.1	1	1	1	1	1	1	1
AC011933.3	1	1	1	1	1	1	1
AC011933.4	1	1	1	1	1	1	1
AC011939.3	1	1	1	1	1	1	1
AC011944.1	1	1	1	1	1	1	1
AC011978.2	1	1	1	1	1	1	1
AC011997.1	1	1	1	1	1	1	1
AC012038.1	1	1	1	1	1	1	1
AC012065.3	1	1	1	1	1	1	1
AC012065.4	1	1	1	1	1	1	1
AC012073.1	1	1	1	1	1	1	1
AC012074.1	1	1	1	1	1	1	1
AC012085.2	1	1	1	1	1	1	1
AC012087.1	1	1	1	1	1	1	1
AC012100.2	1	1	1	1	1	1	1
AC012123.1	1	1	1	1	1	1	1
AC012150.1	1	1	1	1	1	1	1
AC012150.2	1	1	1	1	1	1	1
AC012157.1	1	1	1	1	1	1	1
AC012173.1	1	1	1	1	1	1	1
AC012184.1	1	1	1	1	1	1	1
AC012213.2	1	1	1	1	1	1	1
AC012213.3	1	1	1	1	1	1	1
AC012236.1	1	1	1	1	1	1	1
AC012254.3	1	1	1	1	1	1	1
AC012306.2	1	1	1	1	1	1	24.4347
AC012309.5	1	1	1	1	1	1	1
AC012313.1	1	1	1	1	1	1	1
AC012313.2	1	1	1	1	1	1	1
AC012313.5	1	1	1	1	1	1	1
AC012313.6	1	1	1	1	1	1	1
AC012313.7	1	1	1	1	1	1	1
AC012313.8	1	1	1	1	1	1	1
AC012313.9	1	1	1	1	1	1	1
AC012314.8	1	1	1	1	1	1	1
AC012349.1	1	1	1	1	1	1	1
AC012358.1	1	1	1	1	1	1	1
AC012358.3	1	1	1	1	1	1	1
AC012358.7	1	1	1	1	1	1	1
AC012358.8	1	1	1	1	1	1	1
AC012360.1	1	1	1	1	1	1	1
AC012360.2	1	1	1	1	1	1	1
AC012360.3	1	30.3363	1	1	1	1	1
AC012360.4	1	1	1	1	1	1	1
AC012363.1	1	1	1	1	1	1	1
AC012368.1	1	1	1	1	1	1	1
AC012368.2	1	1	1	1	1	1	1
AC012377.1	1	1	1	1	1	1	1
AC012404.1	1	1	1	1	1	1	1
AC012414.5	1	1	1	1	1	1	1
AC012435.2	1	1	1	1	1	1	1
AC012442.1	1	1	1	1	1	1	1
AC012442.6	1	1	1	1	1	1	1
AC012447.1	1	1	1	1	1	1	1
AC012464.3	1	1	1	1	1	1	1
AC012467.2	1	1	1	1	1	1	1
AC012485.3	1	1	1	1	1	1	1
AC012487.2	1	1	1	1	1	1	1
AC012507.2	1	1	1	1	1	1	1
AC012508.1	1	1	1	1	1	1	1
AC012510.1	1	1	1	1	1	1	1
AC012511.1	1	1	1	1	1	1	1
AC012557.1	1	1	1	1	1	1	1
AC012557.2	1	1	1	1	1	1	1
AC012588.1	1	1	1	1	1	1	1
AC012593.1	1	1	1	1	1	1	1
AC012594.1	1	1	1	1	1	1	1
AC012603.1	1	1	1	1	1	1	1
AC012615.1	1	1	1	1	1	1	1
AC012615.2	1	1	1	1	1	1	1
AC012615.5	1	1	1	1	1	1	1
AC012617.1	1	1	1	1	1	1	1
AC012629.2	1	1	1	1	1	1	1
AC012636.1	1	1	1	1	1	1	1
AC012640.1	1	1	1	1	1	1	1
AC012640.2	1	1	1	1	1	1	1
AC012640.4	1	1	1	1	1	1	1
AC012645.1	1	1	1	1	1	1	1
AC012645.2	1	1	1	1	1	1	1
AC012645.3	1	1	1	1	1	1	1
AC012645.4	1	1	1	1	1	1	1
AC012651.1	1	1	1	1	1	1	1
AC012668.3	1	1	1	1	1	1	1
AC013264.1	1	1	1	1	1	1	1
AC013264.2	1	1	1	1	1	1	1
AC013270.1	1	1	1	1	1	1	1
AC013271.1	1	1	1	1	1	1	1
AC013394.1	1	1	1	1	1	1	1
AC013400.1	1	1	1	1	1	1	1
AC013403.2	1	1	1	1	1	1	1
AC013436.1	1	1	1	1	1	1	1
AC013449.1	1	1	1	1	1	1	1
AC013468.1	1	1	1	1	1	1	1
AC013470.2	1	1	1	1	1	1	1
AC013472.3	1	1	1	1	1	1	1
AC013553.4	1	1	1	1	1	1	1
AC013565.3	1	1	1	1	1	1	1
AC013652.1	1	1	1	1	1	1	1
AC013714.1	1	1	1	1	1	1	1
AC013726.1	1	1	1	1	1	1	1
AC013731.1	1	1	1	1	1	1	1
AC015468.3	1	1	1	1	1	1	1
AC015660.4	1	1	1	1	1	1	1
AC015674.1	1	1	1	1	1	1	1
AC015689.1	1	1	1	1	1	1	1
AC015691.13	1	1	1	1	1	1	1
AC015712.1	1	1	1	1	1	1	1
AC015712.2	1	1	1	1	1	1	1
AC015726.1	1	1	1	1	1	1	1
AC015727.1	1	1	1	1	1	1	1
AC015795.1	1	1	1	1	1	1	1
AC015802.4	1	1	1	1	1	1	1
AC015802.6	1	1	1	1	1	1	1
AC015813.1	1	1	1	1	1	1	1
AC015813.2	1	1	1	1	1	1	1
AC015813.3	1	1	1	1	1	1	1
AC015818.2	1	1	1	1	1	1	1
AC015819.1	1	1	1	1	1	1	1
AC015819.2	1	1	1	1	1	1	1
AC015845.2	1	1	1	1	1	1	1
AC015849.1	1	1	1	1	1	1	1
AC015849.19	1	1	1	1	1	1	1
AC015849.2	1	1	1	1	1	1	1
AC015849.3	1	1	1	1	1	1	1
AC015849.5	1	1	1	1	1	1	1
AC015853.2	1	1	1	1	1	1	1
AC015908.2	1	1	1	1	1	1	1
AC015908.4	1	1	1	1	1	1	1
AC015909.2	1	1	1	1	1	1	1
AC015911.6	1	1	1	1	1	1	1
AC015912.3	1	1	1	1	1	1	1
AC015917.2	1	1	1	1	1	1	1
AC015921.1	1	1	1	1	1	1	1
AC015922.4	1	1	1	1	1	1	1
AC015922.6	1	1	1	1	1	1	1
AC015936.1	1	1	1	1	1	1	1
AC015936.3	1	1	1	1	1	1	1
AC015961.2	1	1	1	1	1	1	1
AC015967.1	1	1	1	1	1	1	1
AC015969.1	1	1	1	1	1	1	1
AC015971.1	1	1	1	1	1	1	1
AC015982.1	1	1	1	1	1	1	1
AC015987.1	1	1	1	1	1	1	1
AC015987.2	1	1	1	1	1	1	1
AC016027.1	1	1	1	1	1	1	1
AC016065.1	1	1	1	1	1	1	1
AC016168.1	1	1	1	1	1	1	1
AC016205.1	1	1	1	1	1	1	1
AC016245.1	1	1	1	1	1	1	1
AC016257.1	1	1	1	1	1	1	1
AC016355.1	1	1	1	1	1	1	1
AC016394.1	1	1	1	1	1	1	1
AC016394.2	1	1	1	1	1	1	1
AC016405.2	1	1	1	1	1	1	1
AC016405.3	1	1	1	1	1	1	1
AC016493.1	1	1	1	1	1	1	1
AC016573.1	1	1	1	1	1	1	1
AC016575.1	1	1	1	1	1	1	1
AC016586.1	1	1	1	1	1	1	1
AC016588.2	1	1	1	1	1	1	1
AC016590.1	1	1	1	1	1	1	1
AC016590.3	1	1	1	1	1	1	1
AC016596.1	1	1	1	1	1	1	1
AC016629.2	1	1	1	1	1	1	1
AC016629.3	1	1	1	1	1	1	1
AC016629.8	1	1	1	1	1	1	1
AC016683.1	1	1	1	1	1	1	1
AC016683.5	1	1	1	1	1	1	1
AC016700.3	1	1	1	1	1	1	1
AC016700.5	1	1	1	1	1	1	1
AC016705.2	1	1	1	1	1	1	1
AC016708.1	1	1	1	1	1	1	1
AC016717.2	1	1	1	1	1	1	1
AC016722.1	1	1	1	1	1	1	1
AC016722.2	1	1	1	1	1	1	1
AC016722.3	1	1	1	1	1	1	1
AC016722.4	1	1	1	1	1	1	1
AC016727.1	1	1	1	1	1	1	1
AC016735.1	1	1	1	1	1	1	1
AC016737.1	1	1	1	1	1	1	1
AC016737.2	1	1	1	1	1	1	1
AC016738.1	1	1	1	1	1	1	1
AC016745.1	1	1	1	1	1	1	1
AC016745.2	1	1	1	1	1	1	1
AC016745.3	1	1	1	1	1	1	1
AC016757.3	1	1	1	1	1	1	1
AC016773.1	1	1	1	1	1	1	1
AC016831.1	1	1	1	1	1	1	1
AC016831.5	1	1	1	44.107	1	1	1
AC016831.7	1	1	52.7026	1	1	1	1
AC016866.1	1	1	1	1	1	1	1
AC016866.2	1	1	1	1	1	1	1
AC016876.1	1	1	1	1	1	1	1
AC016876.3	1	1	1	1	1	1	1
AC016877.1	1	1	1	1	1	1	1
AC016888.1	1	1	1	1	1	1	1
AC016907.2	1	1	1	1	1	1	1
AC016907.3	1	1	1	1	1	1	1
AC016924.1	1	1	1	1	1	1	1
AC016957.2	1	1	1	1	1	1	1
AC017002.1	1	1	1	1	1	1	1
AC017002.2	1	1	1	1	1	1	1
AC017002.3	1	1	1	1	1	1	1
AC017071.1	1	1	1	1	1	1	1
AC017076.1	1	1	1	1	1	1	1
AC017076.5	1	1	1	1	1	1	1
AC017083.1	1	1	1	1	1	1	1
AC017083.2	1	1	1	1	1	1	1
AC017083.3	1	1	1	1	1	1	1
AC017100.1	1	1	1	1	1	1	1
AC017104.2	1	1	1	1	1	1	1
AC017104.3	1	1	1	1	1	1	1
AC018359.1	1	1	1	1	1	1	1
AC018362.1	1	1	1	1	1	1	1
AC018362.2	1	1	1	1	1	1	1
AC018410.1	1	1	1	1	1	1	1
AC018413.1	1	1	1	1	1	1	1
AC018442.2	1	1	1	1	1	1	1
AC018462.1	1	1	1	1	1	1	1
AC018462.2	1	1	1	1	1	1	1
AC018521.2	1	1	1	1	1	1	1
AC018521.4	1	1	1	1	1	1	1
AC018521.7	1	1	1	1	1	1	1
AC018523.2	1	1	1	1	1	1	1
AC018529.1	1	1	1	1	1	1	1
AC018529.2	1	1	1	1	1	1	1
AC018553.1	1	1	1	1	1	1	1
AC018553.2	1	1	1	1	1	1	1
AC018557.1	1	1	1	1	1	1	1
AC018557.2	1	1	1	1	1	1	1
AC018630.2	1	1	1	1	1	1	1
AC018638.6	1	1	1	1	1	1	1
AC018638.7	1	1	1	1	1	1	1
AC018645.2	1	1	1	1	1	1	1
AC018647.1	1	1	1	1	1	1	1
AC018647.2	1	1	1	1	1	1	1
AC018648.1	1	1	1	1	1	1	1
AC018653.3	1	1	1	1	1	1	1
AC018682.1	1	1	1	1	1	1	1
AC018682.2	1	1	1	1	1	1	1
AC018690.1	1	1	1	1	1	1	1
AC018693.1	1	1	1	1	1	1	1
AC018695.2	1	1	1	1	1	1	1
AC018742.1	1	1	1	1	1	1	1
AC018754.1	1	1	1	1	1	1	1
AC018755.1	1	1	1	1	1	1	1
AC018761.2	1	1	1	1	1	1	1
AC018761.3	1	1	1	1	1	1	1
AC018766.4	1	1	1	1	1	1	1
AC018766.5	1	1	1	1	1	1	1
AC018781.1	1	1	1	1	1	1	1
AC018797.2	1	1	1	1	1	1	1
AC018809.2	1	1	1	1	1	1	1
AC018816.1	1	1	1	1	1	1	1
AC018816.3	1	1	1	1	1	1	1
AC018845.3	1	1	1	1	1	1	1
AC018878.1	1	1	1	1	1	1	1
AC018904.1	1	1	1	1	1	1	1
AC019068.1	1	1	1	1	1	1	1
AC019069.1	1	1	1	1	1	1	1
AC019077.1	1	1	1	1	1	1	1
AC019080.4	1	1	1	1	1	1	1
AC019118.2	1	1	1	1	1	1	1
AC019129.2	1	1	1	1	1	1	1
AC019131.2	1	1	1	1	1	1	1
AC019163.1	1	1	1	1	1	1	1
AC019171.1	1	1	1	1	1	1	1
AC019197.1	1	1	1	1	1	1	1
AC019205.1	1	1	1	1	1	1	1
AC019254.1	1	1	1	1	1	1	1
AC019257.1	1	1	1	1	1	1	1
AC019257.2	1	1	1	1	1	1	1
AC019257.8	1	1	1	1	1	1	1
AC019349.1	1	1	1	1	1	1	1
AC020558.1	1	1	1	1	1	1	1
AC020571.1	1	1	1	1	1	1	1
AC020571.3	1	1	1	1	1	1	1
AC020594.1	1	1	1	1	1	1	1
AC020636.1	1	1	1	1	1	1	1
AC020651.1	1	1	1	1	1	1	1
AC020656.1	1	1	1	1	2654.41	2140.43	1
AC020656.2	1	1	1	1	1	1	1
AC020658.2	1	1	1	1	1	1	1
AC020659.1	1	1	1	1	1	1	1
AC020661.1	1	1	1	1	1	1	1
AC020661.3	1	1	1	1	1	1	1
AC020663.2	1	1	1	1	1	1	1
AC020703.1	1	1	1	1	1	1	1
AC020741.1	1	1	1	1	1	1	1
AC020743.1	1	1	1	1	1	1	1
AC020743.2	1	1	1	1	1	1	1
AC020743.3	1	1	1	1	1	1	1
AC020763.1	1	1	1	1	1	1	1
AC020765.2	1	1	1	1	1	1	1
AC020900.1	1	1	1	1	1	1	1
AC020907.3	1	1	1	1	1	1	1
AC020907.4	1	1	1	1	1	1	1
AC020908.3	1	1	1	1	1	1	1
AC020909.2	1	1	1	1	1	1	1
AC020909.3	1	1	1	1	1	1	1
AC020910.4	1	1	1	1	1	1	1
AC020911.1	1	1	1	1	1	1	1
AC020911.2	1	1	1	1	1	1	1
AC020913.1	1	1	1	1	1	1	1
AC020913.2	1	1	1	1	1	1	1
AC020915.1	1	1	1	1	1	1	1
AC020915.3	1	1	1	1	1	1	1
AC020915.5	1	1	1	1	1	1	1
AC020916.1	1	67.7845	1	1	1	1	1
AC020916.2	1	1	1	1	1	1	1
AC020917.2	1	1	1	1	1	1	1
AC020917.3	1	1	1	1	1	1	1
AC020922.1	1	1	1	1	1	1	1
AC020922.2	1	1	1	1	1	1	1
AC020922.4	1	1	1	1	1	1	1
AC020928.1	1	1	1	1	1	1	1
AC020928.2	1	1	1	1	1	1	1
AC020928.3	1	1	1	1	1	1	1
AC020934.2	1	1	1	1	1	1	1
AC020978.2	1	1	1	1	1	1	1
AC020978.5	1	1	1	1	1	1	1
AC021016.3	1	1	1	1	1	1	1
AC021028.1	1	1	1	1	1	1	1
AC021054.1	1	1	1	1	1	1	1
AC021072.1	1	1	1	1	1	1	1
AC021074.3	1	1	1	1	1	1	1
AC021086.1	1	1	1	1	1	1	1
AC021087.1	1	1	1	1	1	1	1
AC021092.1	1	1	1	1	1	1	1
AC021097.1	1	1	1	1	1	1	1
AC021127.1	1	1	1	1	1	1	1
AC021151.1	1	1	1	1	1	1	1
AC021188.1	1	1	1	1	1	1	1
AC021188.4	1	1	1	1	1	1	1
AC021205.3	1	1	1	1	1	1	1
AC021224.1	1	1	1	1	1	1	1
AC021242.3	1	1	1	1	1	1	1
AC021321.1	1	1	1	1	1	1	1
AC021422.1	1	1	1	1	1	1	1
AC021483.2	1	1	1	1	1	1	1
AC021491.1	1	1	1	1	1	1	1
AC021491.4	1	1	1	1	1	1	1
AC021504.1	1	1	1	1	1	1	1
AC021546.1	1	1	1	1	1	1	1
AC021594.2	1	1	1	1	1	1	1
AC021678.2	1	1	1	1	1	1	1
AC021683.1	1	1	1	1	1	1	1
AC021683.2	1	1	1	1	1	1	1
AC021683.3	1	1	1	1	1	1	1
AC021713.1	1	1	1	1	1	1	1
AC021739.2	1	1	1	1	1	1	1
AC021739.3	1	1	1	1	1	1	1
AC021739.4	1	1	1	1	1	1	1
AC021752.1	1	1	1	1	1	1	1
AC021755.3	1	1	1	1	1	1	1
AC021851.1	1	1	1	1	1	1	1
AC021860.1	1	1	1	1	1	1	1
AC021915.2	1	1	1	1	1	1	1
AC021979.2	1	1	1	1	1	1	1
AC022001.3	1	1	1	1	1	1	1
AC022007.1	1	1	1	1	1	1	1
AC022007.5	1	1	1	1	1	1	1
AC022021.1	1	1	1	1	1	1	1
AC022034.2	1	1	1	1	1	1	1
AC022075.1	1	1	1	1	1	1	1
AC022075.3	1	1	1	1	1	1	1
AC022079.2	1	1	1	1	1	1	1
AC022087.1	1	1	1	1	1	1	1
AC022092.1	1	1	1	1	1	1	1
AC022098.1	1	1	1	1	1	1	1
AC022098.2	1	1	1	1	1	1	1
AC022098.3	1	1	1	1	1	1	1
AC022098.4	1	1	1	1	1	1	1
AC022113.1	1	1	1	1	1	1	1
AC022113.2	1	1	1	1	1	1	1
AC022140.1	1	1	1	1	1	1	1
AC022144.1	1	1	1	1	1	1	1
AC022146.2	1	1	1	1	1	1	1
AC022148.1	1	1	1	1	1	1	1
AC022148.2	1	1	1	1	1	1	1
AC022150.1	1	1	1	1	1	1	1
AC022154.1	1	1	1	1	1	1	1
AC022154.7	1	1	1	1	1	1	1
AC022167.1	1	1	1	1	1	1	1
AC022167.2	1	1	1	1	1	1	1
AC022167.3	1	1	1	1	1	1	1
AC022167.4	1	1	1	1	1	1	1
AC022167.5	1	1	1	1	1	1	1
AC022182.1	1	1	1	1	1	1	1
AC022182.2	1	1	1	1	1	1	1
AC022182.3	1	1	1	1	1	1	1
AC022201.2	1	1	1	1	1	1	1
AC022211.2	1	1	1	1	1	1	1
AC022217.3	1	1	1	1	1	1	1
AC022239.1	1	1	1	1	1	1	1
AC022240.1	1	1	1	1	1	1	1
AC022274.1	1	1	1	1	1	1	1
AC022296.3	1	1	1	1	1	1	1
AC022306.2	1	1	1	1	1	1	1
AC022311.1	1	1	1	1	1	1	1
AC022364.1	1	1	1	1	1	1	1
AC022382.1	1	1	1	1	1	1	1
AC022390.1	1	1	1	1	1	1	1
AC022395.1	1	1	1	1	1	1	1
AC022398.1	1	1	1	1	1	1	1
AC022400.2	1	1	1	1	1	1	1
AC022400.6	1	1	1	1	1	1	1
AC022400.7	1	1	1	1	1	1	1
AC022498.1	1	1	1	1	1	1	1
AC022509.4	1	1	1	1	1	1	1
AC022517.1	1	1	1	1	1	1	1
AC022532.1	1	1	1	1	1	1	1
AC022540.1	1	1	1	1	1	1	1
AC022558.2	1	1	1	1	1	1	1
AC022558.3	1	1	1	1	1	1	1
AC022568.1	1	1	1	1	1	1	1
AC022613.1	1	1	1	1	1	1	1
AC022613.2	1	1	1	1	1	1	1
AC022679.1	1	1	1	1	1	1	1
AC022706.1	1	1	1	1	1	1	1
AC022710.1	1	1	1	1	1	1	1
AC022726.2	1	1	1	1	1	1	1
AC022730.4	1	1	1	1	1	1	1
AC022733.1	1	1	1	1	1	1	1
AC022733.2	1	1	1	1	1	1	1
AC022762.2	1	1	1	1	1	1	1
AC022778.1	1	1	1	1	1	1	1
AC022784.1	1	1	1	1	1	1	1
AC022784.3	1	1	1	1	1	1	1
AC022784.7	1	1	1	1	1	1	1
AC022784.8	1	1	1	1	1	1	1
AC022858.1	1	1	1	1	1	1	1
AC022874.1	1	1	1	1	1	1	1
AC022893.1	1	1	1	1	1	1	1
AC022916.1	1	1	1	1	1	1	1
AC022929.2	1	1	1	1	1	1	1
AC022960.1	1	1	1	1	1	1	1
AC022973.2	1	1	1	1	1	1	1
AC022973.3	1	1	1	1	1	1	1
AC022973.4	1	1	1	1	1	1	1
AC023024.1	1	1	1	1	1	1	1
AC023034.1	1	1	1	1	1	1	1
AC023043.1	1	1	1	1	1	1	1
AC023055.1	1	1	1	1	1	1	1
AC023157.3	1	1	1	1	1	1	1
AC023202.1	1	1	1	1	1	1	1
AC023300.2	1	1	1	1	1	1	1
AC023302.1	1	1	1	1	1	1	1
AC023347.1	1	1	1	1	1	1	1
AC023355.1	1	1	1	1	1	1	1
AC023389.1	1	1	1	1	1	1	1
AC023481.1	1	1	1	1	1	1	1
AC023490.1	1	1	1	1	1	1	1
AC023491.2	1	1	1	1	1	1	1
AC023509.2	1	1	1	1	1	1	1
AC023509.3	1	1	1	1	1	1	1
AC023509.4	1	1	1	1	1	1	1
AC023510.1	1	1	1	1	1	1	1
AC023590.1	1	1	1	1	1	1	1
AC023632.1	1	1	1	1	1	1	1
AC023632.2	1	1	1	1	1	1	1
AC023790.2	1	1	1	1	1	1	1
AC023794.3	1	1	1	1	1	1	1
AC023794.6	1	1	1	1	1	1	1
AC023813.3	1	1	1	1	1	1	1
AC023825.2	1	1	1	1	1	1	1
AC023830.2	1	1	1	1	1	1	1
AC023855.1	1	1	1	1	1	1	1
AC023906.3	1	1	1	1	1	1	1
AC023906.4	1	1	1	1	1	1	1
AC023906.5	1	1	1	1	1	1	1
AC023908.3	1	1	1	1	1	1	1
AC023946.1	1	1	1	1	1	1	1
AC023983.2	1	1	1	1	1	1	1
AC024028.1	1	1	1	1	1	1	1
AC024060.1	1	1	1	1	1	1	1
AC024075.3	1	1	1	1	1	1	1
AC024084.1	1	1	1	1	1	1	1
AC024145.1	1	1	1	1	1	1	1
AC024243.1	1	1	1	1	1	1	1
AC024257.3	1	1	1	1	1	1	1
AC024257.4	1	1	1	1	1	1	1
AC024257.5	1	1	1	1	1	1	1
AC024267.1	1	1	1	1	1	1	1
AC024267.3	1	1	1	1	1	1	1
AC024267.4	1	1	1	1	1	1	1
AC024267.5	1	1	1	1	1	1	1
AC024267.6	1	1	1	1	1	1	1
AC024270.4	1	1	1	1	1	1	1
AC024361.2	1	1	1	1	1	1	1
AC024475.1	1	1	1	1	1	1	1
AC024560.1	1	1	1	1	1	1	1
AC024560.2	1	1	1	1	1	1	1
AC024560.3	1	1	1	1	1	1	1
AC024575.1	1	1	1	1	1	1	1
AC024581.1	1	1	1	1	1	1	1
AC024592.12	1	1	1	1	1	1	1
AC024592.2	1	1	1	1	1	1	1
AC024592.3	1	1	1	1	1	1	1
AC024600.1	1	1	1	1	1	1	1
AC024610.2	1	1	1	1	1	1	1
AC024704.2	1	1	1	1	1	1	1
AC024884.2	1	1	1	1	1	1	1
AC024896.1	1	1	1	1	1	1	1
AC024908.1	1	1	1	1	1	1	1
AC024909.2	1	1	1	1	1	1	1
AC024933.1	1	1	1	1	1	1	1
AC024940.1	1	1	1	1	1	1	1
AC025031.2	1	1	1	1	1	1	1
AC025031.4	1	1	1	1	1	1	1
AC025034.1	1	1	1	1	1	1	1
AC025040.1	1	1	1	1	1	1	1
AC025043.1	1	1	1	1	1	1	1
AC025048.4	1	1	1	1	1	1	1
AC025154.2	1	1	1	1	1	1	1
AC025159.1	43.5097	41.6784	1	1	1	1	23.295
AC025162.1	1	1	1	1	1	1	1
AC025164.1	1	1	1	1	1	1	1
AC025165.2	1	1	1	1	1	1	1
AC025165.4	1	1	1	1	1	1	1
AC025165.5	1	1	1	1	1	1	1
AC025166.1	1	1	1	1	1	1	1
AC025171.1	1	1	1	1	1	1	1
AC025171.2	1	1	1	1	1	1	1
AC025171.3	1	1	1	1	1	1	1
AC025171.4	1	1	1	1	1	1	1
AC025171.5	1	1	1	1	1	1	1
AC025175.1	1	1	1	1	1	1	1
AC025176.1	1	1	1	1	1	1	1
AC025178.1	1	1	1	1	1	1	1
AC025181.2	1	1	1	1	1	1	1
AC025188.1	1	1	1	1	1	1	1
AC025211.1	1	1	1	1	1	1	1
AC025219.1	1	1	1	1	1	1	1
AC025253.1	1	1	1	1	1	1	1
AC025257.1	1	1	1	1	1	1	1
AC025259.1	1	1	1	1	1	1	1
AC025259.3	1	1	1	1	1	1	1
AC025262.1	1	1	1	1	1	1	1
AC025263.1	1	1	1	1	1	1	1
AC025265.1	1	1	1	1	1	1	1
AC025283.2	1	1	1	1	1	1	1
AC025283.3	1	1	1	1	1	1	1
AC025287.2	1	1	1	1	1	1	1
AC025287.3	1	1	1	1	1	1	1
AC025287.4	1	1	1	1	1	1	1
AC025335.1	1	1	1	1	1	1	1
AC025370.1	1	1	1	1	1	1	1
AC025419.1	1	1	1	1	1	1	1
AC025423.1	1	1	1	1	1	1	1
AC025423.4	1	1	1	1	1	1	1
AC025430.1	1	1	1	1	1	1	1
AC025437.1	1	1	1	1	1	1	1
AC025437.2	1	1	1	1	1	1	1
AC025437.3	1	1	1	1	1	1	1
AC025437.4	1	1	1	1	1	1	1
AC025437.5	1	1	1	1	1	1	1
AC025442.1	1	1	1	1	1	1	1
AC025442.3	1	1	1	1	1	1	1
AC025470.2	1	1	1	1	1	1	1
AC025539.1	1	1	1	1	1	1	1
AC025569.1	1	1	1	1	1	1	1
AC025575.2	1	1	1	1	1	1	1
AC025580.1	1	1	1	1	1	1	1
AC025580.2	1	1	1	1	1	1	1
AC025580.3	1	1	1	1	1	1	1
AC025682.1	1	1	1	1	1	1	1
AC025754.2	1	1	1	1	1	1	1
AC025887.2	1	1	1	1	1	1	1
AC025917.1	1	1	1	1	1	1	1
AC026150.1	1	1	1	1	1	1	1
AC026150.3	1	1	1	1	1	1	1
AC026150.5	1	1	1	1	1	1	1
AC026191.1	1	1	1	1	1	1	1
AC026202.1	1	1	1	1	1	1	1
AC026202.2	1	1	1	1	1	1	1
AC026202.3	1	1	1	1	1	1	1
AC026250.1	1	1	1	1	1	1	1
AC026254.2	1	1	1	1	1	1	1
AC026304.1	1	1	1	1	1	1	1
AC026333.3	1	1	1	1	1	1	1
AC026333.4	1	1	1	1	1	1	1
AC026347.1	1	1	1	1	1	1	1
AC026355.1	1	1	1	1	1	1	1
AC026367.1	1	1	1	1	1	1	1
AC026367.2	1	1	1	1	1	1	1
AC026367.3	1	1	1	1	1	1	1
AC026369.1	1	1	1	1	1	1	1
AC026369.3	1	1	1	1	1	1	1
AC026401.1	1	1	1	1	1	1	1
AC026401.3	1	1	1	1	1	1	1
AC026412.3	1	1	1	1	1	1	1
AC026427.1	1	1	1	1	1	1	1
AC026458.2	1	1	1	1	1	1	1
AC026461.3	1	1	1	1	1	1	1
AC026471.1	1	1	1	1	1	1	1
AC026471.2	1	1	1	1	1	1	1
AC026471.3	1	1	1	1	1	1	1
AC026471.4	1	1	1	1	1	1	1
AC026471.6	1	1	1	1	1	1	1
AC026691.1	1	1	1	1	1	1	1
AC026704.1	1	1	1	1	1	1	1
AC026725.1	1	1	1	1	1	1	1
AC026726.1	1	1	1	1	1	1	1
AC026740.1	1	1	1	1	1	1	1
AC026741.1	1	1	1	1	1	1	1
AC026785.2	1	1	1	1	1	1	1
AC026786.2	1	1	1	1	1	1	1
AC026801.2	1	1	1	1	1	1	1
AC026803.2	1	1	1	1	1	1	1
AC026806.2	1	1	1	1	1	1	1
AC026904.2	1	1	1	1	1	1	1
AC026954.2	1	1	1	1	1	1	1
AC026979.1	1	1	1	1	1	1	1
AC026979.2	1	1	56.6742	89.1739	1	1	1
AC026979.3	1	1	1	1	1	1	1
AC026992.1	1	1	1	1	1	1	1
AC026992.2	1	1	1	1	1	1	1
AC027018.1	1	1	1	1	1	1	1
AC027020.1	1	1	1	1	1	1	1
AC027020.2	1	1	1	1	1	1	1
AC027031.2	1	1	1	1	1	1	1
AC027045.3	1	1	1	1	1	1	1
AC027097.1	1	1	1	1	1	1	1
AC027097.2	1	1	1	1	1	1	1
AC027130.1	1	1	1	1	1	1	1
AC027228.1	1	1	1	1	1	1	1
AC027237.2	1	1	1	1	1	1	1
AC027237.3	1	1	1	1	1	1	1
AC027271.1	1	1	1	1	1	1	1
AC027277.1	1	1	1	1	1	1	1
AC027288.3	1	1	1	1	1	1	1
AC027290.1	1	1	1	1	1	1	1
AC027306.1	1	1	1	1	1	1	1
AC027307.1	1	1	1	1	1	1	1
AC027307.2	1	1	1	1	1	1	1
AC027307.3	1	1	1	1	1	1	1
AC027319.1	1	1	1	1	1	1	1
AC027449.1	1	1	1	1	1	1	1
AC027575.2	1	1	1	1	1	1	1
AC027601.1	1	1	1	1	1	1	1
AC027601.3	1	1	1	1	1	1	1
AC027601.4	1	1	1	1	1	1	1
AC027607.1	1	1	1	1	1	1	1
AC027644.3	1	1	1	1	1	1	1
AC027644.4	1	1	1	1	1	1	1
AC027682.1	1	1	1	1	1	1	1
AC027682.2	1	1	1	1	1	1	1
AC027682.3	1	1	1	1	1	1	1
AC027682.4	1	1	1	1	1	1	1
AC027682.6	1	1	1	1	1	1	1
AC027702.1	1	1	1	1	1	1	1
AC027763.2	1	1	1	1	1	1	1
AC027796.3	1	1	1	1	1	1	1
AC027796.4	1	1	1	1	1	1	1
AC027801.1	1	1	1	1	1	1	1
AC032011.1	1	1	1	1	1	1	1
AC032044.1	1	1	1	1	1	1	1
AC034102.4	1	1	1	1	1	1	1
AC034102.5	1	1	1	1	1	1	1
AC034102.6	1	1	1	1	1	1	1
AC034102.8	1	1	1	1	1	1	1
AC034111.1	1	1	1	1	1	1	1
AC034114.2	1	1	1	1	1	1	1
AC034195.1	1	1	1	1	1	1	1
AC034198.2	1	1	1	1	1	1	1
AC034199.1	1	1	1	1	1	1	1
AC034229.1	1	1	1	1	1	1	1
AC034229.4	1	1	1	1	1	1	1
AC034231.1	1	1	1	1	1	1	1
AC034236.2	1	1	1	1	1	1	1
AC034236.3	1	1	1	1	1	1	1
AC034243.1	1	1	1	1	1	1	1
AC035140.1	1	1	1	1	1	1	1
AC036103.1	1	1	1	1	1	1	1
AC036108.2	1	1	1	1	1	1	1
AC036108.3	1	1	1	1	1	1	1
AC036108.4	1	1	1	1	1	1	1
AC036176.1	1	1	1	1	1	1	1
AC036214.3	1	1	1	1	1	1	1
AC036222.1	1	1	1	1	1	1	1
AC037459.2	1	1	1	1	1	1	1
AC037459.3	1	1	1	1	1	1	1
AC037487.1	1	1	1	1	1	1	1
AC037487.2	1	1	1	1	1	1	1
AC040162.1	1	1	1	1	1	1	1
AC040162.3	1	1	1	1	1	1	1
AC040169.1	1	1	1	1	1	1	1
AC040173.1	1	1	1	1	1	1	1
AC040934.1	1	1	1	1	1	1	1
AC040970.1	1	1	1	1	1	1	1
AC040977.1	1	1	1	1	1	1	1
AC044802.1	1	1	1	1	1	1	1
AC044802.2	1	1	1	1	1	1	1
AC044810.3	1	1	1	1	1	1	1
AC044839.1	1	1	1	1	1	1	1
AC044849.1	1	1	53.0885	53.7474	1	1	1
AC046130.1	1	1	1	1	1	1	1
AC046130.2	1	1	1	1	1	1	1
AC046136.1	1	1	1	1	1	1	1
AC046143.1	1	1	1	1	1	1	1
AC046143.2	1	1	1	1	1	1	1
AC046143.3	1	1	1	1	1	1	1
AC046158.1	1	1	1	1	1	1	1
AC048341.1	1	1	1	1	1	1	1
AC048341.2	1	1	1	1	1	1	1
AC048382.1	1	1	1	1	1	1	1
AC048382.5	1	1	1	1	1	1	1
AC048382.6	1	1	1	1	1	1	1
AC051619.5	1	1	1	1	1	1	1
AC053503.2	1	1	1	1	1	1	1
AC053503.5	1	1	1	1	1	1	1
AC053513.1	1	1	1	1	1	1	1
AC053527.1	1	1	1	1	1	1	1
AC055713.1	1	1	1	1	1	1	1
AC055717.1	1	1	1	1	1	1	1
AC055764.2	1	1	1	1	1	1	1
AC055811.3	1	1	1	1	1	1	1
AC055822.1	1	1	1	1	1	1	1
AC055855.1	1	1	1	1	1	1	1
AC055874.1	1	1	1	1	1	1	1
AC055876.5	1	1	1	1	1	1	1
AC058791.1	1	1	1	48.0132	1	1	1
AC060766.4	1	1	1	1	1	1	1
AC060766.6	1	1	1	1	1	1	1
AC060780.1	71.7059	1	1	1	1	1	1
AC060814.3	1	1	1	1	1	1	1
AC060834.2	1	1	1	1	1	1	1
AC061975.7	1	1	1	1	1	1	1
AC061992.1	1	1	1	1	1	1	1
AC061992.2	1	1	1	1	1	1	1
AC062004.1	1	1	1	1	1	1	1
AC062017.1	1	1	1	1	1	1	1
AC062028.1	1	1	1	1	1	1	1
AC062029.1	1	1	1	1	1	1	1
AC063943.1	1	1	1	1	1	1	1
AC064801.1	1	1	1	1	1	1	1
AC064805.1	1	1	1	1	1	1	1
AC064805.2	1	1	1	1	1	1	1
AC064807.1	1	1	1	1	1	1	1
AC064807.2	1	1	1	1	1	1	1
AC064807.4	1	1	1	1	1	1	1
AC064834.1	1	1	1	1	1	1	1
AC064834.2	1	1	1	1	1	1	1
AC064834.3	1	1	1	1	1	1	1
AC064836.2	1	1	1	1	1	1	1
AC064836.3	1	1	1	1	1	1	1
AC067735.1	1	1	1	1	1	1	1
AC067747.1	1	1	1	1	1	1	1
AC067750.1	1	1	1	1	1	1	1
AC067817.2	1	1	1	1	1	1	1
AC067838.1	1	1	1	1	1	1	1
AC067852.2	1	1	1	1	1	1	1
AC067863.1	1	1	1	1	1	1	1
AC067930.1	1	1	1	1	1	1	1
AC067930.2	1	1	1	1	1	1	1
AC067930.3	1	1	1	1	1	1	1
AC067930.4	1	1	1	1	1	1	1
AC067930.5	1	1	1	1	1	1	1
AC067959.1	1	1	1	1	1	1	1
AC068025.1	1	1	1	1	1	1	1
AC068025.2	1	1	1	1	1	1	1
AC068039.4	1	1	1	1	1	1	1
AC068051.1	1	1	1	1	1	1	1
AC068189.1	1	1	1	1	1	1	1
AC068196.1	1	1	1	1	1	1	1
AC068228.1	1	1	1	1	1	1	1
AC068234.2	1	1	1	1	1	1	1
AC068282.1	1	1	1	1	1	1	1
AC068282.3	1	1	1	1	1	1	1
AC068338.2	1	1	1	1	1	1	1
AC068338.3	1	1	1	1	1	1	1
AC068389.1	1	1	1	1	1	1	1
AC068389.2	1	1	1	1	1	1	1
AC068389.4	1	1	1	1	1	1	1
AC068413.1	1	1	1	1	1	1	1
AC068418.1	1	1	1	1	1	1	1
AC068446.2	1	1	1	1	1	1	1
AC068473.1	1	1	1	1	1	1	1
AC068473.2	1	1	1	1	1	1	1
AC068473.5	1	1	1	1	1	1	1
AC068491.3	1	1	1	1	1	1	1
AC068499.10	1	1	1	1	1	1	1
AC068580.3	1	1	1	1	1	1	1
AC068580.4	1	1	1	1	1	1	1
AC068620.1	1	1	1	1	1	1	1
AC068620.2	1	1	1	1	1	1	1
AC068631.1	1	1	1	1	1	1	1
AC068722.2	1	1	1	1	1	1	1
AC068724.1	1	1	1	1	1	1	1
AC068724.3	1	1	1	1	1	1	1
AC068756.1	1	1	1	1	1	1	1
AC068759.1	1	1	1	1	1	1	1
AC068768.1	1	1	1	1	1	1	1
AC068768.2	1	1	1	1	1	1	1
AC068775.1	1	1	1	1	1	1	1
AC068789.1	1	1	1	1	1	1	1
AC068790.8	1	1	1	1	1	1	1
AC068790.9	1	1	1	1	1	1	1
AC068831.1	1	1	1	1	1	1	1
[truncated: 25,812 more rows]
