# Supplementary material for: Identification of immune and stromal cell infiltration-related gene signature for prognosis prediction in acute lymphoblastic leukemia
Source: Aging (Albany NY). 2022 Sep 19;14(18):7470–504. doi: 10.18632/aging.204292 (PMC9550239; doi:10.18632/aging.204292)
Supplement: Supplementary Table 6 [file aging-14-204292-s006.xlsx]

## Sheet: GSE13576 
Supplementary Table 6. Patients' ID and clinicopathologic characteristics of external validation datasets.
ID	Prognosis	Sample sourse	Diagnostic	Country	LILRA1	NRGN	VPREB3	MT-ND6	EMP2	IGHM	FFAR1	Risk score
GSM342363	no relapse	BM	B-ALL	Italy	4.45663	5.26069	11.7897	8.52643	7.78396	12.5516	6.23155	0.00866964
GSM342360	no relapse	BM	B-ALL	Italy	3.66314	7.25762	11.5506	7.8079	8.22851	11.8941	5.08501	0.00804117
GSM342468	no relapse	BM	B-ALL	Italy	4.56901	6.37459	10.6788	7.59298	5.50527	11.6156	3.79244	0.00800011
GSM342362	no relapse	BM	B-ALL	Italy	3.69662	6.65016	11.4286	7.04923	8.17152	12.1805	4.83774	0.0079411
GSM342347	no relapse	BM	B-ALL	Italy	4.17852	4.52466	11.8313	5.4361	6.92739	12.1179	4.83235	0.00784537
GSM342432	no relapse	BM	B-ALL	Italy	3.44005	5.70054	9.94863	8.44421	9.51657	10.3638	4.71331	0.00783991
GSM342408	early relapse	BM	B-ALL	Italy	3.79434	4.00697	12.5022	6.86697	9.1918	12.1845	3.72472	0.00781996
GSM342474	no relapse	BM	B-ALL	Italy	4.2933	5.16687	10.7086	9.09503	6.43585	10.8127	3.63863	0.00776394
GSM342356	late relapse	BM	B-ALL	Italy	4.14288	5.21496	10.2678	7.78161	6.12493	12.0035	4.87495	0.00768106
GSM342359	no relapse	BM	B-ALL	Italy	3.63273	6.17098	11.7578	6.21635	7.70738	12.2948	4.69587	0.00767001
GSM342383	no relapse	BM	B-ALL	Italy	3.65687	4.43778	10.3471	8.1485	8.06058	10.7593	5.4673	0.00763088
GSM342415	no relapse	BM	B-ALL	Italy	4.226	5.00749	9.64806	6.14349	5.20485	10.9143	5.75391	0.00759753
GSM342322	late relapse	BM	B-ALL	Italy	4.62442	4.66322	9.01454	7.48642	4.27636	10.352	4.29467	0.00753789
GSM342402	early relapse	BM	B-ALL	Italy	3.64052	6.62231	11.1889	6.77189	6.68396	13.2021	5.19261	0.00753592
GSM342358	no relapse	BM	B-ALL	Italy	3.44003	7.16602	12.1818	8.1645	7.73169	12.2786	3.96813	0.00752604
GSM342499	no relapse	BM	B-ALL	Italy	4.10715	5.37707	7.60333	7.44186	5.38943	9.20476	5.62801	0.00751373
GSM342349	no relapse	BM	B-ALL	Italy	3.86932	4.77965	11.5998	5.76069	6.94539	11.4139	4.45209	0.0074965
GSM342510	no relapse	BM	B-ALL	Italy	3.47194	5.8827	10.8245	8.32027	8.16486	11.3557	4.10034	0.00748658
GSM342357	no relapse	BM	B-ALL	Italy	3.76669	5.95231	11.5867	8.15415	6.58609	12.0271	4.48989	0.00747215
GSM342416	no relapse	BM	B-ALL	Italy	3.98555	5.06474	10.3874	6.27824	6.0685	12.101	4.87625	0.00747165
GSM342354	early relapse	BM	B-ALL	Italy	3.55833	4.2795	11.0527	7.18127	8.71439	10.9449	3.72527	0.00744985
GSM342507	no relapse	BM	B-ALL	Italy	3.45812	5.07733	10.7369	7.72307	8.06466	11.4363	4.97706	0.00744761
GSM342368	no relapse	BM	B-ALL	Italy	3.94673	4.56818	10.4157	6.22983	6.33636	11.6597	4.93413	0.00743785
GSM342344	no relapse	BM	B-ALL	Italy	3.40272	5.32485	11.8327	7.26578	8.69453	6.42343	3.76351	0.00742709
GSM342454	no relapse	BM	B-ALL	Italy	3.9035	4.3902	7.92655	8.19827	7.18841	10.2899	4.01567	0.00742388
GSM342491	early relapse	BM	B-ALL	Italy	3.51915	6.69938	9.62262	8.53417	7.36162	10.6814	4.02616	0.00740762
GSM342455	no relapse	BM	B-ALL	Italy	3.92961	5.26657	10.2529	7.97585	6.44802	11.9099	3.85832	0.00740731
GSM342430	no relapse	BM	B-ALL	Italy	3.93241	4.60053	8.87066	7.4062	6.52497	11.5313	4.59186	0.00740633
GSM342465	no relapse	BM	B-ALL	Italy	4.06816	4.85083	9.96252	7.74709	5.86509	12.0533	4.18358	0.00738563
GSM342451	early relapse	BM	B-ALL	Italy	3.82213	4.36597	7.97256	8.38914	7.03545	10.7043	4.61647	0.00737628
GSM342325	early relapse	BM	B-ALL	Italy	4.18134	5.09674	7.81704	7.65919	4.46906	11.4328	5.83701	0.00735649
GSM342456	no relapse	BM	B-ALL	Italy	3.45871	5.57938	12.2765	7.10839	7.61192	12.1501	4.38489	0.00734933
GSM342427	no relapse	BM	B-ALL	Italy	3.59041	5.082	11.7892	6.57943	7.47774	11.1489	4.17078	0.0073449
GSM342434	no relapse	BM	B-ALL	Italy	3.68126	4.85861	10.6632	8.62433	7.30949	10.0356	3.90239	0.00731835
GSM342450	no relapse	BM	B-ALL	Italy	3.81611	4.72001	11.4924	8.80341	6.8373	10.1782	3.6201	0.00730184
GSM342343	no relapse	BM	B-ALL	Italy	4.01584	4.34748	9.27058	7.45609	5.96855	11.4442	4.41396	0.00730133
GSM342352	no relapse	BM	B-ALL	Italy	3.69789	5.07675	11.6411	8.67521	6.79333	11.0523	4.17336	0.00729039
GSM342355	no relapse	BM	B-ALL	Italy	4.15038	4.15122	8.99418	7.36025	5.16961	12.5557	4.98977	0.0072866
GSM342376	no relapse	BM	B-ALL	Italy	3.59119	5.62778	11.037	7.48638	6.80501	13.109	4.48391	0.00728404
GSM342484	early relapse	BM	B-ALL	Italy	3.69361	5.22327	10.9943	8.48809	6.23489	11.608	5.1771	0.00728315
GSM342431	no relapse	BM	B-ALL	Italy	4.10601	4.72349	9.82042	6.46409	5.39242	11.2626	4.22669	0.00728077
GSM342466	no relapse	BM	B-ALL	Italy	3.52349	4.6921	6.88733	6.24873	7.32799	11.8725	5.5508	0.00727154
GSM342449	no relapse	BM	B-ALL	Italy	3.73678	5.33285	10.8874	8.64032	6.41388	11.0185	4.27601	0.00726813
GSM342442	no relapse	BM	B-ALL	Italy	3.74802	4.68255	10.3971	9.22583	6.76588	11.4965	4.10867	0.00725511
GSM342483	no relapse	BM	B-ALL	Italy	4.14014	4.61376	10.6093	8.45021	4.72891	11.4536	4.91187	0.00724727
GSM342509	no relapse	BM	B-ALL	Italy	3.51668	5.03512	9.14964	8.59913	7.55598	10.7842	4.22995	0.00724605
GSM342448	no relapse	BM	B-ALL	Italy	3.88242	4.80519	9.884	7.86772	6.39797	9.74014	3.70098	0.00724534
GSM342447	no relapse	BM	B-ALL	Italy	4.08536	4.96524	7.83633	7.15063	5.36212	7.16767	4.26993	0.00724301
GSM342501	no relapse	BM	B-ALL	Italy	3.51762	4.75568	10.3217	10.3158	6.85374	9.3473	5.63865	0.0072408
GSM342381	no relapse	BM	B-ALL	Italy	3.68789	8.27576	8.88105	7.36315	5.23319	10.9873	4.069	0.00724073
GSM342492	no relapse	BM	B-ALL	Italy	3.71734	4.89175	11.2923	9.5344	6.60216	10.7701	4.08188	0.00722113
GSM342428	no relapse	BM	B-ALL	Italy	3.65197	5.86048	6.95107	6.99039	7.00372	7.92699	3.54787	0.00721269
GSM342370	no relapse	BM	B-ALL	Italy	3.66415	5.31034	12.3931	7.9988	6.6084	11.426	3.85163	0.00720739
GSM342461	no relapse	BM	B-ALL	Italy	3.6527	4.69538	9.03588	9.95791	6.88132	10.4897	4.46239	0.00720593
GSM342351	no relapse	BM	B-ALL	Italy	3.80518	5.46565	12.1974	7.20878	5.93982	11.5505	3.85653	0.00720075
GSM342444	early relapse	BM	B-ALL	Italy	3.62976	5.74638	8.93617	8.80632	6.54904	10.1037	4.22967	0.00719939
GSM342335	no relapse	BM	B-ALL	Italy	3.76088	3.97843	11.3293	6.18223	6.72802	11.7811	4.35773	0.00719915
GSM342506	no relapse	BM	B-ALL	Italy	3.69995	4.5378	8.49274	7.4059	7.06395	11.285	3.76004	0.00716842
GSM342436	no relapse	BM	B-ALL	Italy	3.95197	4.3325	10.7249	8.25967	5.95095	10.3952	3.62771	0.00714986
GSM342345	no relapse	BM	B-ALL	Italy	3.51397	4.61851	11.7428	7.84668	7.27844	11.8749	4.10661	0.00714654
GSM342473	no relapse	BM	B-ALL	Italy	3.78415	4.5477	10.4834	8.93485	6.42441	11.3419	3.80284	0.00714615
GSM342361	no relapse	BM	B-ALL	Italy	3.14617	6.63518	12.0949	8.76148	8.00458	11.6377	3.45748	0.007139
GSM342367	no relapse	BM	B-ALL	Italy	3.6162	5.96177	9.14689	8.08515	6.19212	11.5824	4.25557	0.00713012
GSM342365	no relapse	BM	B-ALL	Italy	3.68561	5.43947	10.8554	6.80602	6.30653	12.1141	3.80051	0.00713009
GSM342515	no relapse	BM	B-ALL	Italy	3.86829	5.53959	7.98645	6.90275	4.88129	10.549	5.31569	0.00711422
GSM342390	no relapse	BM	B-ALL	Italy	3.65006	4.59549	10.7243	7.21187	6.45098	11.3492	4.57015	0.0071132
GSM342475	no relapse	BM	B-ALL	Italy	3.71708	4.33563	10.6497	9.11195	6.34446	9.55287	4.48152	0.0071131
GSM342382	early relapse	BM	B-ALL	Italy	3.87431	4.47256	9.06553	8.89637	5.44407	11.2447	4.99649	0.00711038
GSM342443	no relapse	BM	B-ALL	Italy	3.63295	4.63502	11.1465	8.51192	6.76443	10.5932	3.91639	0.00710667
GSM342396	no relapse	BM	B-ALL	Italy	3.48655	5.05241	9.92417	7.55245	7.0063	12.1024	4.37081	0.00710578
GSM342353	no relapse	BM	B-ALL	Italy	3.76025	5.52714	11.0718	6.48705	5.94007	12.3441	3.60038	0.00710417
GSM342377	no relapse	BM	B-ALL	Italy	3.91508	4.953	9.29695	7.00081	5.27487	10.7619	4.43794	0.00709547
GSM342323	early relapse	BM	B-ALL	Italy	4.12265	4.87607	9.03606	7.14436	4.64378	10.6554	4.01289	0.00708394
GSM342378	no relapse	BM	B-ALL	Italy	3.93651	5.27584	8.26005	7.18789	4.61716	12.2796	5.21424	0.00708147
GSM342338	late relapse	BM	B-ALL	Italy	3.79113	4.56984	11.2271	6.57036	5.89933	12.2972	4.17078	0.00707482
GSM342399	early relapse	BM	B-ALL	Italy	4.14298	5.30497	7.8037	7.49333	3.83406	12.4131	4.9551	0.00706379
GSM342412	no relapse	BM	B-ALL	Italy	3.73789	4.77074	11.7912	8.07927	5.77364	11.9569	4.37579	0.00705696
GSM342350	no relapse	BM	B-ALL	Italy	3.81952	4.28497	11.6726	7.97743	5.93884	6.42185	3.98168	0.00704932
GSM342439	no relapse	BM	B-ALL	Italy	3.83323	4.75667	10.7923	7.85103	5.54093	10.9753	4.12061	0.00704042
GSM342470	no relapse	BM	B-ALL	Italy	3.97983	5.09722	10.5423	6.51254	4.71357	11.8667	4.25576	0.0070399
GSM342462	no relapse	BM	B-ALL	Italy	3.72212	5.63049	9.97898	8.05519	5.64155	10.3395	3.98941	0.00703275
GSM342337	no relapse	BM	B-ALL	Italy	3.66581	5.1106	9.14406	7.95607	5.58461	10.9286	5.19549	0.00703194
GSM342414	no relapse	BM	B-ALL	Italy	3.64694	3.48625	11.9615	7.26278	6.88626	12.0522	3.95074	0.0070141
GSM342458	no relapse	BM	B-ALL	Italy	4.19186	3.75826	10.3935	7.27289	4.7161	11.9909	3.68288	0.00701062
GSM342385	late relapse	BM	B-ALL	Italy	3.48782	5.90274	10.5016	6.6929	6.08662	12.4496	4.44764	0.00700338
GSM342512	no relapse	BM	B-ALL	Italy	3.84714	4.8235	8.96736	7.60448	5.47154	12.1282	4.0329	0.00700249
GSM342374	no relapse	BM	B-ALL	Italy	3.65487	4.80674	10.4711	5.95995	6.19354	10.3041	3.91262	0.00697899
GSM342348	no relapse	BM	B-ALL	Italy	3.59973	4.96979	10.8975	7.28407	5.53633	10.9377	5.20537	0.00696028
GSM342330	no relapse	BM	B-ALL	Italy	4.01942	4.84435	10.8512	6.73258	4.32116	11.7768	4.20587	0.00694632
GSM342469	no relapse	BM	B-ALL	Italy	3.58757	5.18013	8.40444	7.65073	5.71527	9.74781	4.85656	0.00692685
GSM342384	no relapse	BM	B-ALL	Italy	3.65409	3.95315	7.80131	8.21544	5.57591	11.936	5.67213	0.00690071
GSM342446	no relapse	BM	B-ALL	Italy	3.55087	4.35898	10.7037	7.73892	6.51751	10.4476	3.75028	0.0068817
GSM342319	early relapse	BM	B-ALL	Italy	3.89741	5.41131	6.19357	7.01319	4.4741	10.8836	4.47432	0.00687813
GSM342513	no relapse	BM	B-ALL	Italy	3.83919	4.69219	8.34576	7.27385	4.69347	11.6122	4.87447	0.00687133
GSM342331	early relapse	BM	B-ALL	Italy	4.12228	5.02163	9.90269	7.43841	3.68039	11.6835	3.96881	0.00686912
GSM342440	no relapse	BM	B-ALL	Italy	3.53226	4.98978	10.9122	7.76169	5.99074	11.3929	4.103	0.00686547
GSM342467	early relapse	BM	B-ALL	Italy	3.65197	4.68124	11.4623	6.98411	5.74758	11.2041	3.82711	0.00685844
GSM342409	early relapse	BM	B-ALL	Italy	3.77336	3.96414	11.3581	8.05994	5.54493	12.04	3.91549	0.00685612
GSM342505	no relapse	BM	B-ALL	Italy	3.38392	4.23572	8.69227	8.76046	7.2573	5.5851	3.84611	0.00684166
GSM342327	early relapse	BM	B-ALL	Italy	3.89957	6.45186	10.8523	6.40018	3.60984	12.2378	4.01241	0.00682725
GSM342418	no relapse	BM	B-ALL	Italy	3.73876	6.07692	11.9972	6.0033	4.46358	11.2652	3.76021	0.00680712
GSM342410	no relapse	BM	B-ALL	Italy	3.48207	4.67973	11.5639	7.53925	6.00745	11.539	4.26832	0.00680696
GSM342342	no relapse	BM	B-ALL	Italy	3.68131	4.88721	10.336	5.92478	5.11118	12.3011	4.40327	0.00680666
GSM342457	no relapse	BM	B-ALL	Italy	3.45196	5.34079	9.39586	6.61856	5.92149	11.8536	4.26299	0.00679726
GSM342445	no relapse	BM	B-ALL	Italy	3.55087	5.06633	10.7267	8.83001	5.83497	9.09225	3.6856	0.00679506
GSM342472	no relapse	BM	B-ALL	Italy	3.56656	4.65221	11.6694	6.68637	6.04345	10.9218	3.42126	0.00678673
GSM342380	early relapse	BM	B-ALL	Italy	3.58362	4.31256	9.37705	7.71673	5.52724	11.4308	4.89623	0.00678418
GSM342401	no relapse	BM	B-ALL	Italy	3.49514	4.94957	10.158	7.16486	5.95518	11.5732	4.01701	0.00678255
GSM342481	no relapse	BM	B-ALL	Italy	4.01378	4.19136	10.8635	8.58386	4.1375	8.76776	4.043	0.00678202
GSM342498	no relapse	BM	B-ALL	Italy	3.81978	5.10785	8.16858	7.58088	4.42098	10.3455	4.4368	0.00677295
GSM342333	no relapse	BM	B-ALL	Italy	3.48199	4.31587	10.7287	7.31452	6.1254	11.1794	4.27111	0.00676987
GSM342435	no relapse	BM	B-ALL	Italy	3.22912	4.61957	11.7951	8.8153	7.05931	10.9108	3.80028	0.00674536
GSM342471	no relapse	BM	B-ALL	Italy	3.64272	5.62457	9.80581	7.99526	4.55649	10.9493	4.59916	0.00674473
GSM342397	no relapse	BM	B-ALL	Italy	3.41516	4.45743	11.3996	7.10975	6.0343	11.2271	4.55716	0.0067436
GSM342406	no relapse	BM	B-ALL	Italy	3.42389	4.98482	10.9318	8.05985	5.3614	12.0147	5.26083	0.0067428
GSM342486	no relapse	BM	B-ALL	Italy	3.62077	4.94731	8.10621	5.84053	5.48905	10.6719	3.96731	0.0067419
GSM342391	no relapse	BM	B-ALL	Italy	3.74277	5.70545	9.89887	7.73602	4.34231	11.2598	4.06733	0.00673876
GSM342398	no relapse	BM	B-ALL	Italy	4.00642	4.2935	10.5778	7.44329	4.05988	11.6565	3.77908	0.00673041
GSM342395	no relapse	BM	B-ALL	Italy	3.7376	4.95033	11.1495	9.09323	4.68504	11.932	3.85072	0.00672226
GSM342332	no relapse	BM	B-ALL	Italy	3.95105	5.1197	5.08421	7.27898	4.26896	10.6613	3.71057	0.00672082
GSM342420	no relapse	BM	B-ALL	Italy	3.81272	4.99964	10.4924	9.00159	4.5961	11.4173	3.44175	0.00671801
GSM342487	no relapse	BM	B-ALL	Italy	3.67267	4.18231	11.9134	8.06933	4.99402	10.4928	4.49222	0.00671753
GSM342386	no relapse	BM	B-ALL	Italy	3.45859	5.64213	9.60781	7.25617	5.09604	12.151	4.83464	0.00671604
GSM342514	no relapse	BM	B-ALL	Italy	3.56317	4.55976	9.99315	7.63425	5.63634	10.6069	3.98842	0.00671235
GSM342387	no relapse	BM	B-ALL	Italy	3.65805	6.39541	10.8607	6.85841	4.16615	11.9736	4.05481	0.00671078
GSM342324	no relapse	BM	B-ALL	Italy	3.9143	4.17128	11.1637	7.92307	4.36008	12.3366	3.78517	0.00670859
GSM342339	no relapse	BM	B-ALL	Italy	3.47594	4.38602	10.3718	8.08959	5.84895	12.3658	4.29936	0.00670578
GSM342508	no relapse	BM	B-ALL	Italy	3.51444	4.962	7.24125	8.31618	5.25649	10.921	4.98248	0.00670087
GSM342485	no relapse	BM	B-ALL	Italy	3.49145	4.44572	8.96049	8.46523	5.76027	10.9423	4.43165	0.00669608
GSM342340	no relapse	BM	B-ALL	Italy	3.57237	4.14786	9.98571	7.23879	5.47854	12.1241	4.49035	0.00669415
GSM342480	no relapse	BM	B-ALL	Italy	3.81526	5.23211	10.6108	8.15685	4.149	11.5029	3.88031	0.00669341
GSM342460	no relapse	BM	B-ALL	Italy	3.59041	5.41711	10.5973	8.41256	4.89233	10.0729	4.07576	0.00669184
GSM342479	no relapse	BM	B-ALL	Italy	3.65687	4.82322	10.063	8.43389	4.82904	10.8831	4.32423	0.00669109
GSM342494	no relapse	BM	B-ALL	Italy	3.35967	4.74121	11.082	9.5573	6.16762	9.10213	4.05067	0.00668971
GSM342502	no relapse	BM	B-ALL	Italy	3.69753	5.03751	9.8006	7.48579	4.25543	11.6489	4.79574	0.00667096
GSM342400	no relapse	BM	B-ALL	Italy	3.82213	4.59473	9.30723	8.29224	4.32338	11.6214	4.10627	0.00666497
GSM342417	no relapse	BM	B-ALL	Italy	3.58843	4.33019	10.8768	6.25261	5.5405	10.9076	3.7524	0.00666268
GSM342464	no relapse	BM	B-ALL	Italy	3.6818	5.18627	9.57161	8.82326	4.52984	10.5247	4.08534	0.00664995
GSM342493	no relapse	BM	B-ALL	Italy	3.35034	5.07852	9.76271	9.42618	5.15517	11.0785	5.59785	0.00664963
GSM342496	no relapse	BM	B-ALL	Italy	3.57556	4.34578	9.93026	7.53196	5.25015	11.4527	4.35645	0.00664614
GSM342403	no relapse	BM	B-ALL	Italy	3.75854	4.23139	10.4215	8.08244	4.71784	12.5114	3.90712	0.00664517
GSM342497	no relapse	BM	B-ALL	Italy	3.79461	4.37507	9.42199	8.2067	4.54215	8.40919	3.93477	0.0066312
GSM342482	no relapse	BM	B-ALL	Italy	3.48418	4.85365	10.2607	8.56312	5.30248	9.67736	4.30662	0.00663034
GSM342423	no relapse	BM	B-ALL	Italy	3.51614	4.40252	10.4969	7.14754	5.51352	11.4862	4.02562	0.00662307
GSM342375	no relapse	BM	B-ALL	Italy	3.71278	5.14851	11.7086	7.43755	4.35593	10.4247	3.74117	0.00662069
GSM342326	early relapse	BM	B-ALL	Italy	3.82523	4.75233	7.82439	5.49578	4.39731	11.2484	3.69902	0.00661161
GSM342452	no relapse	BM	B-ALL	Italy	3.51335	4.36306	10.1824	7.43155	5.46929	12.3412	4.06246	0.00660612
GSM342394	no relapse	BM	B-ALL	Italy	3.65197	5.8238	9.02789	8.07467	4.10759	12.2076	4.22851	0.00660581
GSM342373	no relapse	BM	B-ALL	Italy	3.71329	4.75148	11.5216	8.55762	4.17715	11.6277	4.28588	0.00659865
GSM342320	no relapse	BM	B-ALL	Italy	3.87639	4.27997	11.5769	7.36907	4.17409	11.6885	3.46763	0.00659539
GSM342372	no relapse	BM	B-ALL	Italy	3.64514	4.93036	11.6811	6.68237	4.63874	11.9446	3.7588	0.00659381
GSM342478	no relapse	BM	B-ALL	Italy	3.6043	4.7207	10.1807	8.98165	4.50823	10.1074	4.51866	0.00656584
GSM342459	no relapse	BM	B-ALL	Italy	3.55472	4.47378	10.3655	8.16778	5.10396	11.16	3.96364	0.0065617
GSM342433	no relapse	BM	B-ALL	Italy	3.59177	4.68043	9.97673	8.29216	4.91184	10.6489	3.83049	0.00655414
GSM342366	late relapse	BM	B-ALL	Italy	3.56451	5.24167	10.2535	8.31931	4.60834	11.2136	4.00537	0.00655341
GSM342392	no relapse	BM	B-ALL	Italy	3.54427	3.80196	9.7133	7.699	5.16145	11.9825	4.56748	0.00654133
GSM342364	no relapse	BM	B-ALL	Italy	3.62554	4.13625	10.1338	8.12607	4.72742	12.014	4.27876	0.00653406
GSM342379	no relapse	BM	B-ALL	Italy	3.66966	4.45074	7.64249	7.34282	4.63914	10.8498	4.12075	0.00652605
GSM342334	early relapse	BM	B-ALL	Italy	3.42325	4.24249	12.1744	6.48125	5.80311	11.424	3.37168	0.00651749
GSM342369	no relapse	BM	B-ALL	Italy	3.50438	4.26893	11.2315	7.45369	5.20915	11.3041	3.87786	0.00650857
GSM342504	no relapse	BM	B-ALL	Italy	3.51283	4.86892	9.22987	8.17564	4.92947	10.8778	3.88208	0.00649228
GSM342328	no relapse	BM	B-ALL	Italy	3.70302	4.38499	7.31313	6.21452	4.12544	12.3993	4.68584	0.00648782
GSM342453	no relapse	BM	B-ALL	Italy	3.55224	4.30088	9.37066	7.64513	4.93599	10.8294	4.09546	0.00648686
GSM342407	no relapse	BM	B-ALL	Italy	3.42828	3.83373	12.5354	7.09702	5.75966	12.283	3.50797	0.0064863
GSM342389	no relapse	BM	B-ALL	Italy	3.65197	3.82235	9.92915	7.8032	4.68308	11.6595	4.16279	0.00648605
GSM342489	no relapse	BM	B-ALL	Italy	3.4725	4.49936	9.94932	9.30242	5.15981	10.2866	3.92697	0.00648138
GSM342419	no relapse	BM	B-ALL	Italy	3.56832	5.23014	6.60617	9.29819	4.27423	11.3242	4.52886	0.00647496
GSM342388	no relapse	BM	B-ALL	Italy	3.48266	3.92386	9.23504	6.90938	4.68303	12.0336	5.29108	0.00645113
GSM342404	early relapse	BM	B-ALL	Italy	3.72204	4.28013	11.9141	7.06205	4.10503	11.29	3.68928	0.00644444
GSM342405	no relapse	BM	B-ALL	Italy	3.61094	4.23036	11.5822	8.10295	4.63372	11.1509	3.50092	0.00642833
GSM342511	no relapse	BM	B-ALL	Italy	3.32648	4.09104	10.9618	8.62259	5.59557	10.9671	4.09779	0.00642164
GSM342441	early relapse	BM	B-ALL	Italy	3.26323	3.78667	11.6964	8.75837	6.09349	11.538	3.75363	0.00641135
GSM342463	no relapse	BM	B-ALL	Italy	3.40148	4.47256	8.70883	8.50285	5.28832	11.1033	3.75772	0.00638688
GSM342477	late relapse	BM	B-ALL	Italy	3.54613	4.32056	10.9537	7.79328	4.69508	10.8991	3.42469	0.00636239
GSM342411	no relapse	BM	B-ALL	Italy	3.4734	4.94718	10.0901	6.83432	4.56043	11.4096	3.77314	0.00636171
GSM342421	late relapse	BM	B-ALL	Italy	3.30013	5.74578	11.661	7.11923	4.66017	10.2926	3.75143	0.00633537
GSM342437	no relapse	BM	B-ALL	Italy	3.5669	4.47897	11.4128	8.58853	4.20253	10.4573	3.76077	0.00633497
GSM342476	no relapse	BM	B-ALL	Italy	3.35969	4.84099	11.7795	9.09826	4.7525	11.6089	3.89258	0.00633434
GSM342425	no relapse	BM	B-ALL	Italy	3.47819	4.29875	8.55452	7.64513	4.95331	10.8195	3.57754	0.00632688
GSM342341	no relapse	BM	B-ALL	Italy	3.42158	3.83737	10.4938	6.69931	4.92249	12.5594	4.26848	0.00632395
GSM342371	early relapse	BM	B-ALL	Italy	3.43539	4.67214	10.7832	6.6159	4.6096	11.1387	3.87938	0.00632121
GSM342424	no relapse	BM	B-ALL	Italy	3.45456	4.69437	9.06443	5.53638	4.45237	11.1159	4.11771	0.00629776
GSM342422	no relapse	BM	B-ALL	Italy	3.31482	4.66988	9.01382	7.98525	4.84477	11.4621	4.33877	0.00628727
GSM342413	no relapse	BM	B-ALL	Italy	3.28764	4.48826	11.5182	7.48067	5.13386	12.3378	3.81837	0.00628646
GSM342490	no relapse	BM	B-ALL	Italy	3.46888	4.24821	5.88402	9.39679	4.74939	9.11634	4.0522	0.00627315
GSM342329	early relapse	BM	B-ALL	Italy	3.56349	4.96038	7.84873	6.63815	4.22287	11.4631	3.31232	0.00626842
GSM342503	no relapse	BM	B-ALL	Italy	3.37262	4.10034	10.1132	9.6352	5.06569	10.8123	3.61076	0.00625906
GSM342488	no relapse	BM	B-ALL	Italy	3.41839	4.46898	10.6548	8.33871	4.41133	11.3756	3.93721	0.00623831
GSM342429	no relapse	BM	B-ALL	Italy	3.32599	5.11552	6.63939	8.29291	4.80785	9.1	3.67196	0.00621144
GSM342500	no relapse	BM	B-ALL	Italy	3.43906	4.44816	10.6924	9.162	4.17025	10.8665	3.98525	0.00620496
GSM342321	no relapse	BM	B-ALL	Italy	3.50724	4.64484	10.8212	7.67353	3.88126	12.3104	3.76087	0.00619998
GSM342393	no relapse	BM	B-ALL	Italy	3.5153	3.71673	12.322	9.14071	4.24459	11.4091	3.59173	0.00618627
GSM342346	no relapse	BM	B-ALL	Italy	3.53166	3.42472	11.9842	6.81502	4.32783	11.8656	3.70678	0.00618407
GSM342336	no relapse	BM	B-ALL	Italy	3.31671	4.63051	11.4441	5.14894	4.38822	11.0029	3.88451	0.00613586
GSM342495	late relapse	BM	B-ALL	Italy	3.32101	4.60143	10.912	7.63774	4.19749	11.523	4.03919	0.00611157
GSM342426	early relapse	BM	B-ALL	Italy	3.28202	4.38781	8.00043	8.31669	4.56891	10.5548	4.09695	0.00608937
GSM342438	no relapse	BM	B-ALL	Italy	3.20658	4.98764	9.55428	9.26417	4.37609	11.6239	3.89603	0.0060511

## Sheet: GSE50999 
Table S6. Patients' ID and clinicopathologic characteristics external validation datasets.
ID	Prognosis	Age (years)	Gender	Sample sourse	Diagnostic	Country	LILRA1	NRGN	VPREB3	MT-ND6	EMP2	IGHM	FFAR1	Risk score
GSM1234418	Relapse	9.7	Male	BM	T-ALL	Brazil	41.4149	115.296	203.736	437.113	900.966	176.836	196.041	0.278978
GSM1556808	Relapse	2.9	Female	BM	T-ALL	Brazil	140.568	143.202	177.771	371.564	701.99	270.88	143.174	0.285921
GSM1234432	No Relapse	10.9	Male	BM	T-ALL	Brazil	80.3839	125.911	158.627	350.372	599.857	215.454	108.117	0.289253
GSM1234426	Relapse	8.7	Female	BM	T-ALL	Brazil	120.921	160.484	228.864	543.965	1067.23	208.622	208.462	0.303371
GSM1234430	No Relapse	12	Female	BM	T-ALL	Brazil	145.534	151.504	201.784	498.302	1066.66	268.305	155.485	0.324528
GSM1234415	No Relapse	8.6	Male	BM	T-ALL	Brazil	108.897	149.871	216.521	466.509	756.185	362.476	144.546	0.32641
GSM1556813	No Relapse	3.5	Female	BM	T-ALL	Brazil	87.3888	115.565	164.01	432.064	865.516	248.489	131.813	0.336955
GSM1234425	No Relapse	6.8	Male	BM	T-ALL	Brazil	81.1342	107.968	170.314	392.267	954.919	220.406	154.115	0.356796
GSM1234422	No Relapse	15.2	Male	BM	T-ALL	Brazil	185.23	159.815	223.472	448.608	782.753	208.907	160.296	0.357672
GSM1556805	No Relapse	16.2	Male	BM	T-ALL	Brazil	146.236	189.159	216.028	618.902	532.098	236.084	208.005	0.358472
GSM1234421	No Relapse	6.7	Male	BM	T-ALL	Brazil	57.9748	103.308	235.224	444.057	752.805	253.458	183.1	0.360425
GSM1556809	No Relapse	15.6	Female	BM	T-ALL	Brazil	391.088	124.52	158.523	330.848	893.468	299.229	128.109	0.368508
GSM1556814	No Relapse	17.6	Male	BM	T-ALL	Brazil	1207.92	179.57	192.121	356.739	791.643	325.497	152.22	0.37472
GSM1234423	No Relapse	13.5	Male	BM	T-ALL	Brazil	304.037	154.689	169.51	337.227	996.518	589.932	149.209	0.375853
GSM1556812	No Relapse	12.5	Male	BM	T-ALL	Brazil	66.8288	128.044	159.064	336.766	804.515	349.786	157.041	0.376068
GSM1234417	No Relapse	7.9	Female	BM	T-ALL	Brazil	38.7842	126.773	168.36	295.739	785.216	188.389	161.657	0.377916
GSM1234434	No Relapse	12	Male	BM	T-ALL	Brazil	361.176	165.147	195.297	389.163	975.146	255.04	148.475	0.384714
GSM1556803	No Relapse	1.7	Male	BM	T-ALL	Brazil	113.364	115.166	139.824	445.147	876.125	466.068	102.603	0.393188
GSM1234435	No Relapse	11.5	Male	BM	T-ALL	Brazil	114.494	132.143	131.983	532.067	928.911	286.688	116.934	0.403582
GSM1556815	No Relapse	3.9	Male	BM	T-ALL	Brazil	509.287	146.211	190.49	253.231	944.809	253.912	121.717	0.422192
GSM1556818	No Relapse	4.9	Male	BM	T-ALL	Brazil	161.742	160.281	191.804	311.234	1068.03	290.982	123.099	0.43207
GSM1556804	No Relapse	11.1	Male	BM	T-ALL	Brazil	443.61	217.357	181.856	272.083	948.162	245.283	133.958	0.441816
GSM1234424	No Relapse	4.5	Female	BM	T-ALL	Brazil	142.154	174.998	155.555	1040.53	1291.85	301.859	217.097	0.452555
GSM1556807	No Relapse	3.5	Male	BM	T-ALL	Brazil	285.177	102.907	136.97	1016.98	1054.91	665.351	103.013	0.459914
GSM1234419	No Relapse	4.9	Male	BM	T-ALL	Brazil	330.652	119.425	179.206	1318.27	957.837	269.818	188.776	0.464051
GSM1234420	No Relapse	6	Male	BM	T-ALL	Brazil	217.894	137.441	224.139	868.824	1125.94	278.275	181.175	0.481571
GSM1234437	Relapse	14.5	Male	BM	T-ALL	Brazil	107.638	177.963	178.513	1200.05	847.714	295.402	173.271	0.49522
GSM1556806	No Relapse	13.7	Male	BM	T-ALL	Brazil	189.901	150.609	156.767	1502.86	721.686	315.296	137.624	0.497967
GSM1556811	Relapse	22.6	Male	BM	T-ALL	Brazil	51.1432	118.06	211.805	1238.29	968.796	140.769	192.933	0.499569
GSM1556817	No Relapse	15.6	Female	BM	T-ALL	Brazil	224.64	111.012	259.227	1699.8	749.589	127.198	247.155	0.505493
GSM1556810	No Relapse	2.6	Female	BM	T-ALL	Brazil	87.1312	209.94	190.972	705.56	1192.6	321.272	152.705	0.520367
GSM1556799	Relapse	5.5	Male	BM	T-ALL	Brazil	42.558	95.9606	131.528	1280.88	777.643	331.907	117.523	0.549602
GSM1556802	Relapse	15.1	Male	BM	T-ALL	Brazil	36.5375	136.405	172.772	1512.04	1071.78	409.434	156.456	0.578655
GSM1556800	No Relapse	13.3	Male	BM	T-ALL	Brazil	78.4111	123.165	163.667	1063.76	1534.12	383.418	91.1895	0.61784
GSM1234429	No Relapse	9.3	Female	BM	T-ALL	Brazil	222.762	155.841	256.003	1494.36	759.911	167.863	215.397	0.63326
GSM1556801	No Relapse	5.6	Male	BM	T-ALL	Brazil	54.6105	120.085	243.431	909.904	999.219	197.155	242.381	0.656466
GSM1234433	No Relapse	5.4	Male	BM	T-ALL	Brazil	100.146	194.755	211.896	598.018	669.354	178.685	161.666	0.690343
GSM1234427	Relapse	9.2	Male	BM	T-ALL	Brazil	133.53	199.702	263.373	610.771	617.159	144.808	264.76	0.692272
GSM1556816	Relapse	12.4	Male	BM	T-ALL	Brazil	127.206	192.449	245.454	507.484	862.431	242.16	206.983	0.751417
GSM1234438	No Relapse	4.3	Male	BM	T-ALL	Brazil	463.984	138.999	250.875	789.264	786.069	331.284	145.602	0.776488
GSM1556819	No Relapse	3.1	Male	BM	T-ALL	Brazil	235.397	140.141	194.923	571.6	784.27	373.157	165.143	0.807202
GSM1234436	No Relapse	2	Female	BM	T-ALL	Brazil	160.868	110.993	129.776	577.156	837.227	313.781	153.944	0.835074
GSM1234428	No Relapse	16.1	Male	BM	T-ALL	Brazil	466.908	112.136	137.225	1097.13	1001.27	272.473	155.943	1.55722
